# Supplementary material for: Rhenium and technetium bi- and tricarbonyl complexes in a new strategy for biomolecule incorporation using click chemistry
Source: Royal Society of Chemistry journal article supplement (doi:10.1039/c4dt00684d), 2014-01-01
Supplement: c4dt00684d1.pdf [file c4dt00684d1.pdf]

# Rhenium and Technetium Bi and Tricarbonyl Complexes in a New Strategy for Biomolecule Incorporation using Click Chemistry

Thomas R. Hayes, Benjamin B. Kasten, Charles L. Barnes, Paul D. Benny

## Supporting Information

|                                                      |         |
|------------------------------------------------------|---------|
| Experimental                                         | S2-S4   |
| <sup>99m</sup> Tc Synthesis                          | S5-S8   |
| Tables of Crystallographic Data for Complex <b>2</b> | S9-S16  |
| Tables of Crystallographic Data for Complex <b>3</b> | S17-S28 |
| Tables of Crystallographic Data for Complex <b>5</b> | S29-S36 |
| Tables of Crystallographic Data for Complex <b>6</b> | S37-S45 |
| Tables of Crystallographic Data for Complex <b>7</b> | S46-S56 |
| References                                           | S57     |

## Experimental

All reagents and organic solvents of reagent grade or better were used as purchased from Aldrich, Acros, or Fluka without further purification. Rhenium starting material *fac*-[Re<sup>I</sup>(OH)<sub>2</sub>(CO)<sub>3</sub>](SO<sub>3</sub>CF<sub>3</sub>) was prepared by literature methods from Re<sub>2</sub>(CO)<sub>10</sub> purchased from Strem.<sup>1</sup> <sup>99m</sup>Tc was obtained in the form of Na[<sup>99m</sup>TcO<sub>4</sub>]<sup>-</sup> from Cardinal Health (Spokane, WA) and the *fac*-[<sup>99m</sup>Tc<sup>I</sup>(OH)<sub>2</sub>(CO)<sub>3</sub>]<sup>+</sup> complex was prepared using a commercially available Isolink<sup>®</sup> kit from Covidien. Radiochemical percent yields were determined from the radio-HPLC chromatograms by dividing the radioactive area of the peak of interest by the total radioactive area of all species present in the chromatogram. The preparation of compounds **1** and **4** was performed as previously reported.<sup>2, 3</sup> <sup>1</sup>H and <sup>13</sup>C NMR spectra were recorded on a Varian 300 MHz instrument at 25 °C in CD<sub>3</sub>OD or CDCl<sub>3</sub>. Elemental analyses were performed by Intertek Pharmaceutical Services (Whitehouse, NJ). FT-IR spectra were obtained on a Thermo Nicolet 6700 FT-IR with an ATR cell and analyzed with OMNIC 7.1 software. Mass spectra were obtained on a Thermo-Finnigan LCQ Advantage ESI-MS.

Separation and identification of compounds were conducted on a Perkin Elmer Series 200 High Performance Liquid Chromatography (HPLC) system equipped with a UV/VIS Series 200 detector and a Radiomatic 610TR detector. Utilizing a Varian Pursuit XRs 5 μm particle and 250 x 4.6 mm C-18 column, the compounds were separated with a reverse phase gradient system beginning with 70% 0.1% trifluoroacetic acid (TFA) and 30% methanol eluent gradually shifting to 100% methanol. HPLC analysis was performed using 0-3.0 min (70% TFA, 30% MeOH), 3.0-9.0 min (50% TFA, 50% MeOH), 9.0-18.5 min (50% to 100% MeOH linear gradient), 18.5-28.0 min (100% MeOH) at a flow rate of 1.0 mL/min.

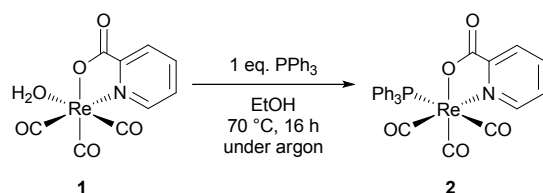

### *fac*-[Re<sup>I</sup>(CO)<sub>3</sub>(pic)(PPh<sub>3</sub>)], **2**.

Triphenylphosphine (6.4 mg, 2.44x10<sup>-5</sup> mol) and **1** (10 mg, 2.44x10<sup>-5</sup> mol) were added to a 5 mL sealable vial followed by the addition of absolute EtOH (2 mL). The vial was sealed, sparged with argon and heated at 70 °C overnight. The solvent was removed in vacuo to yield a yellow residue that was purified by silica column chromatography with 1.5% methanol in dichloromethane. The product eluted as a faint yellow solution (R<sub>f</sub> 0.2) that was dried by rotary evaporation to yield 8.4 mg (53%) of **2** as a tannish-yellow solid. X-ray quality crystals were obtained by slow evaporation from a dichloromethane/MeOH (2:1) solution containing **2**. <sup>1</sup>H NMR [300 MHz δ (ppm), CDCl<sub>3</sub>] 7.24-7.40 (m, 16H), 7.56 (d, 1H), 7.62 (dt, 1H), 8.50 (d, 1H). <sup>13</sup>C NMR [75 MHz, δ (ppm), CDCl<sub>3</sub>] 171.2, 151.7, 150.7, 138.6, 133.8, 130.7, 129.5, 128.9, 127.5. <sup>31</sup>P NMR [121.5 MHz δ (ppm), CDCl<sub>3</sub>] 20.38. MS (+ESI): 656.0 m/z; 656.1 m/z calcd for [M + H]<sup>+</sup>. IR (neat powder, cm<sup>-1</sup>): 2015.0, 1902.8, 1665.5, 1329.4, 759.7, 695.5, 520.0.

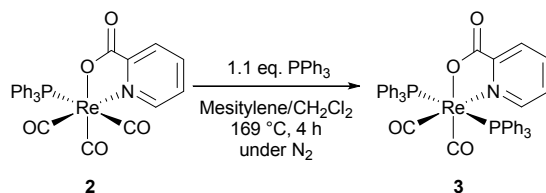

### *cis-trans*-[Re<sup>I</sup>(CO)<sub>2</sub>(pic)(PPh<sub>3</sub>)<sub>2</sub>], **3**.

**2** (30 mg, 4.6x10<sup>-5</sup> mol) dissolved in CH<sub>2</sub>Cl<sub>2</sub> (300 μL) and triphenylphosphine (13.2 mg, 5.0x10<sup>-5</sup> mol) were combined in 2 mL mesitylene sparged with N<sub>2</sub>. The reaction was refluxed at 169 °C with stirring for 4 h under N<sub>2</sub>, during which a tannish-yellow precipitate formed. After cooling the reaction mixture, the precipitate was collected by filtration and rinsed with ice-cold EtOH to yield 37.4 mg (92%) of pure **3**. X-ray quality crystals were obtained by slow diffusion of hexanes into a chloroform solution containing **3**. <sup>1</sup>H NMR [300 MHz δ (ppm), CDCl<sub>3</sub>] 6.71 (ddd, 1H), 7.10 (ddd, 1H), 7.19-7.34 (m, 19H), 7.37-7.45 (m, 12H), 7.91 (ddd, 1H). <sup>13</sup>C NMR [75 MHz δ (ppm), CDCl<sub>3</sub>] 170.8, 150.6, 135.9, 133.8 (t, J<sub>CP</sub> = 5.7 Hz), 132.3 (t, J<sub>CP</sub> = 22.4 Hz), 129.7, 128.4 (t, J<sub>CP</sub> = 4.7 Hz), 126.6 (d, J<sub>CP</sub> = 7.0 Hz). <sup>31</sup>P NMR [121.5 MHz δ (ppm), CDCl<sub>3</sub>] 24.99. MS (+ESI): 890.0 m/z; 890.2 m/z calcd for [M]<sup>+</sup>. IR (neat powder, cm<sup>-1</sup>): 1926.4, 1832.7, 1649.7, 1431.4, 1330.5, 1086.9, 690.4, 499.7.

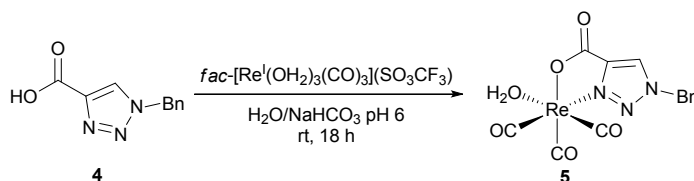

### *fac*-[Re<sup>I</sup>(OH<sub>2</sub>)(CO)<sub>3</sub>](**4**), **5**.

**4** (41 mg, 0.20 mmol) was dissolved in deionized water (5 ml) and adjusted to pH 6 with sodium bicarbonate. A 0.1 M solution of *fac*-[Re<sup>I</sup>(OH<sub>2</sub>)<sub>3</sub>(CO)<sub>3</sub>](SO<sub>3</sub>CF<sub>3</sub>) (2 ml, 0.20 mmol) was added and the solution was stirred at room temperature for 18 h. The resulting precipitate was then collected by filtration, washed with H<sub>2</sub>O and dried in vacuo to yield **5** (48.2 mg, 49% yield) as a white powder. X-ray quality crystals were obtained by slow evaporation from a solution of **5** dissolved in acetone and water. Anal. calcd for C<sub>13</sub>H<sub>10</sub>N<sub>3</sub>O<sub>6</sub>Re: C, 31.84%; H, 2.06%; N, 8.57%. Found: C, 31.91%; H, 1.69%; N, 8.02%. <sup>1</sup>H NMR [300 MHz δ (ppm), CD<sub>3</sub>OD] 8.56 (s, 1H), 8.49 (s, 1H), 7.43-7.45 (m, 5H), 5.75 (d, 2H, J=4.4 Hz). <sup>13</sup>C NMR [75 MHz δ (ppm), CD<sub>3</sub>OD] 197.5, 196.2, 193.8, 169.8, 144.0, 135.2, 130.4, 130.3, 129.7, 128.2, 56.7. MS (+ESI): 513.6 m/z; 514.0 m/z calcd for [M + Na]<sup>+</sup>. IR (neat powder, cm<sup>-1</sup>): 2031.4, 1896.8, 1881.8, 1573.4, 1313.4, 1080.0, 723.7.

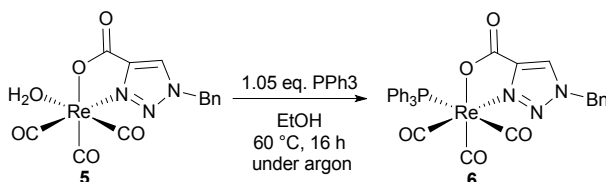

### *fac*-[Re<sup>I</sup>(CO)<sub>3</sub>(**4**)(PPh<sub>3</sub>)], **6**.

**5** (100 mg, 0.204 mmol) was dissolved in 10 mL absolute EtOH sparged with argon. Triphenylphosphine (56.2 mg, 0.214 mmol) was then added and the reaction was stirred at 60 °C in a sealed vial for 16 h. After 16 h, the solution was concentrated to dryness and 3 mL of MeOH was added. The mixture was then cooled to 0 °C, filtered and washed with cold MeOH to give 136.2 mg (91%) of **6** as a white solid. X-ray quality crystals were obtained by slow evaporation from a chloroform/EtOH solution containing **6**. Anal. calcd for C<sub>31</sub>H<sub>23</sub>N<sub>3</sub>O<sub>5</sub>PRE: C, 50.68%; H, 3.16%; N, 5.72%. Found: C, 50.77%; H, 2.34%; N,

5.47%.  $^1\text{H}$  NMR [300 MHz,  $\delta$  (ppm),  $\text{CDCl}_3$ ] 7.61 (s, 1H), 7.44-7.30 (m, 14H), 7.22-7.16 (m, 6H), 5.42 (ABq, 2H,  $J_{\text{AB}} = 14.2$  Hz).  $^{13}\text{C}$  NMR [75 MHz  $\delta$  (ppm),  $\text{CDCl}_3$ ] 166.2, 143.0, 134.1, 134.0, 132.6, 130.8, 130.0, 129.7, 129.5, 128.7, 125.5, 56.0.  $^{31}\text{P}$  NMR [121.5 MHz  $\delta$  (ppm),  $\text{CDCl}_3$ ] 19.76. MS (+ESI): 758.0 m/z; 758.1 m/z calcd for  $[\text{M} + \text{Na}]^+$ . IR (neat powder,  $\text{cm}^{-1}$ ): 3064.6, 2028.1, 1926.5, 1894.6, 1651.9, 1558.5, 1434.4, 1278.7, 1098.0, 695.0.

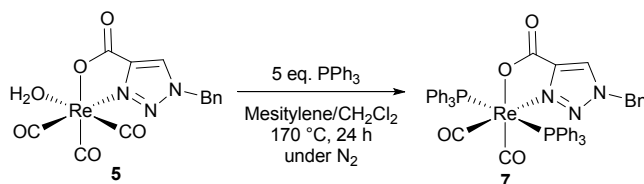

### *cis-trans*- $[\text{Re}^{\text{I}}(\text{CO})_2(\text{PPh}_3)_2(\mathbf{4})]$ , **7**.

Triphenylphosphine (66.8 mg, 0.255 mmol) was dissolved in 2 mL of mesitylene sparged with  $\text{N}_2$  with stirring. **5** (25 mg, 0.051 mmol) dissolved in 1 mL  $\text{CH}_2\text{Cl}_2$  was then added and the reaction was refluxed at 170 °C under  $\text{N}_2$  for 24 h. The reaction mixture was then cooled, filtered and the precipitate was washed with ice cold EtOH and dried in vacuo to give **7** (34.1 mg, 69.0 % yield) as a white solid. X-ray quality crystals were obtained by slow diffusion of hexanes into a chloroform solution containing **7**. Anal. calcd for  $\text{C}_{48}\text{H}_{38}\text{N}_3\text{O}_4\text{P}_2\text{Re}$ : C, 59.50%; H, 3.95%; N, 4.34%. Found: C, 59.85%; H, 3.36%; N, 4.08%.  $^1\text{H}$  NMR [300 MHz,  $\delta$  (ppm),  $\text{CDCl}_3$ ] 7.21-7.48 (m, 15H), 7.28-7.19 (m, 20H), 6.64 (s, 1H), 5.06 (s, 1H).  $^{13}\text{C}$  NMR [75 MHz,  $\delta$  (ppm),  $\text{CDCl}_3$ ] 165.7, 142.9, 134.1 (t,  $J_{\text{CP}} = 5.7$  Hz), 133.0 (t,  $J_{\text{CP}} = 22.3$  Hz), 132.3, 130.1, 129.7 (t,  $J_{\text{CP}} = 4.7$  Hz), 128.3 (d,  $J_{\text{CP}} = 4.7$  Hz), 123.7, 55.6.  $^{31}\text{P}$  NMR [121.5 MHz  $\delta$  (ppm),  $\text{CDCl}_3$ ] 23.96. MS (+ESI): 970.2 m/z; 970.2 m/z calcd for  $[\text{M} + \text{H}]^+$ . IR (neat powder,  $\text{cm}^{-1}$ ): 3060.9, 2029.4, 1945.3, 1898.9, 1866.9, 1644.6, 1557.9, 1433.2, 1278.7, 1095.7, 692.0.

## X-ray Crystallography Procedures

### Complexes **2**, **3**, **5**, **6** and **7**

For all structures intensity data were obtained on a Bruker SMART CCD Area Detector system using the  $\omega$  scan technique with Mo  $K\alpha$  radiation from a graphite monochromator. For **2**, **3** and **5** data were collected at -100 °C; for **6** and **7** data were collected at -173 °C. Intensities were corrected for Lorentz and polarization effects. Equivalent reflections were merged, and absorption corrections were made using the multi-scan method.<sup>4</sup> Space group, lattice parameters and other relevant information are given in supporting information tables S3 through S34. The structures were solved by direct methods with full-matrix least-squares refinement, using the SHELX package<sup>5-7</sup> with the aid of the program X-SEED.<sup>8</sup> All non-hydrogen atoms were refined with anisotropic thermal parameters. The hydrogen atoms were placed at calculated positions and included in the refinement using a riding model, with fixed isotropic  $U$ . For **3**, the final difference map showed some residual density in the vicinity of solvent chloroform, while the final map for **7** contained peaks as high as 0.7  $\text{e}/\text{\AA}^{-3}$  perhaps due to unresolved twinning in the data. Final difference maps for **2**, **5**, and **6** contained no features of chemical significance.

## <sup>99m</sup>Tc synthesis

### *fac*-[<sup>99m</sup>Tc<sup>I</sup>(OH<sub>2</sub>)(CO)<sub>3</sub>(pic)], **1a**

A 10<sup>-2</sup> M solution of picolinic acid in EtOH (100 μL) was added to 10 mM NaHCO<sub>3</sub> (800 μL) in a sealable vial and sparged with N<sub>2</sub> for 5 min. A solution of *fac*-[<sup>99m</sup>Tc<sup>I</sup>(OH<sub>2</sub>)<sub>3</sub>(CO)<sub>3</sub>]<sup>+</sup> (100 μL, 549 μCi) prepared from a Isolink<sup>®</sup> kit from Covidien was then injected and the solution was heated to 90 °C for 30 min. The solution was then cooled and analyzed by radio-HPLC to give **2a** in >98% yield. Peak purified samples for log *P* analysis were obtained by RP-HPLC.

### *fac*-[<sup>99m</sup>Tc<sup>I</sup>(CO)<sub>3</sub>(pic)(PPh<sub>3</sub>)], **2a**

EtOH (800 μL) was added to a 10<sup>-2</sup> M solution of triphenylphosphine in EtOH (100 μL) in a sealable vial. The reaction solution was then sparged with N<sub>2</sub> for 5 min. A solution of **1a** (100 μL, 46 μCi) was then added and the reaction was heated to 60 °C for 1 h. The solution was then cooled and analyzed by radio-HPLC to give **2a** in 93% yield. Peak purified solutions for stability and log *P* analysis were obtained by RP-HPLC.

### *cis-trans*-[<sup>99m</sup>Tc<sup>I</sup>(CO)<sub>2</sub>(pic)(PPh<sub>3</sub>)<sub>2</sub>], **3a**

EtOH (800 μL) was added to a 10<sup>-2</sup> M solution of triphenylphosphine in EtOH (100 μL) in a sealable vial. The reaction solution was then sparged with N<sub>2</sub> for 5 min. A solution of **1a** (100 μL, 55 μCi) was then added and the reaction was heated to 90 °C for 1 h. The solution was then cooled and analyzed by radio-HPLC to give **3a** in >99% yield. Peak purified solutions for stability and log *P* analysis were obtained by RP-HPLC.

### *fac*-[<sup>99m</sup>Tc<sup>I</sup>(OH<sub>2</sub>)(CO)<sub>3</sub>(**4**)], **5a**.

A 5x10<sup>-2</sup> solution of **4** in EtOH was added to 10 mM NaHCO<sub>3</sub> (800 μL) in a sealable vial. The vial was sparged with N<sub>2</sub> for 5 min and a solution of *fac*-[<sup>99m</sup>Tc<sup>I</sup>(OH<sub>2</sub>)<sub>3</sub>(CO)<sub>3</sub>]<sup>+</sup> (100 μL, 663 μCi) was added and the reaction solution was heated at 50 °C for 1 h. The solution was then cooled and analyzed by radio-HPLC to give **5a** in 98% yield. Peak purified samples for log *P* analysis were obtained by RP-HPLC.

### *fac*-[<sup>99m</sup>Tc<sup>I</sup>(CO)<sub>3</sub>(**4**)(PPh<sub>3</sub>)], **6a**

EtOH (800 μL) was added to a 10<sup>-2</sup> M solution of triphenylphosphine in EtOH (100 μL) in a sealable vial. The reaction solution was then sparged with N<sub>2</sub> for 5 min. A solution of **5a** (100 μL, 46 μCi) was then added and the reaction was heated to 60 °C for 1 h. The solution was then cooled and analyzed by radio-HPLC to give **2a** in 81% yield. Peak purified solutions for stability and log *P* analysis were obtained by RP-HPLC.

### *cis-trans*-[<sup>99m</sup>Tc<sup>I</sup>(CO)<sub>2</sub>(**4**)(PPh<sub>3</sub>)<sub>2</sub>], **7a**

EtOH (800 μL) was added to a 10<sup>-2</sup> M solution of triphenylphosphine in EtOH (100 μL) in a sealable vial. The reaction solution was then sparged with N<sub>2</sub> for 5 min. A solution of **5a** (100 μL, 56 μCi) was then added and the reaction was heated to 90 °C for 1 h. The solution was then cooled and analyzed by radio-HPLC to give **3a** in >99% yield. Peak purified solutions for stability and log *P* analysis were obtained by RP-HPLC.

### **Log *P* Determination**

Equal volumes of 10 mM pH 7.4 phosphate buffered saline (PBS) and 1-octanol (500  $\mu$ L each) were vortexed (30 sec) in centrifuge tubes and allowed to stand (2 h) at room temperature. RP-HPLC purified solutions of the complexes were dried under a stream of N<sub>2</sub> and re-dissolved in either 10 mM pH 7.4 PBS (**1a** and **5a**) or 1-octanol (**2a**, **3a**, **6a**, **7a**). Aliquots of solutions containing the reconstituted complexes (0.1  $\mu$ Ci in 3-8  $\mu$ L) were added to triplicate sets of tubes after an equal volume of the corresponding aqueous or organic phase was removed. The tubes were vortexed (1 min) and centrifuged (2,000  $\times$  g, 5 min). Aliquots (50  $\mu$ L) from each layer were removed and counted with a  $\gamma$ -counter to determine the ratio of radioactivity present in the octanol layer compared to the aqueous layer.

### **Stability Studies of <sup>99m</sup>Tc complexes**

Purified solutions of **2a**, **3a**, **6a**, or **7a** (500  $\mu$ L, approximately 5  $\mu$ Ci) were mixed 1:1 with either 2 mM histidine or 2 mM cysteine in 10 mM pH 7.4 phosphate buffer to give a final concentration of 1 mM amino acid in N<sub>2</sub> sparged sealable vials. The solutions were then placed in a 37 °C water bath and samples were taken at 4 and 18 h.

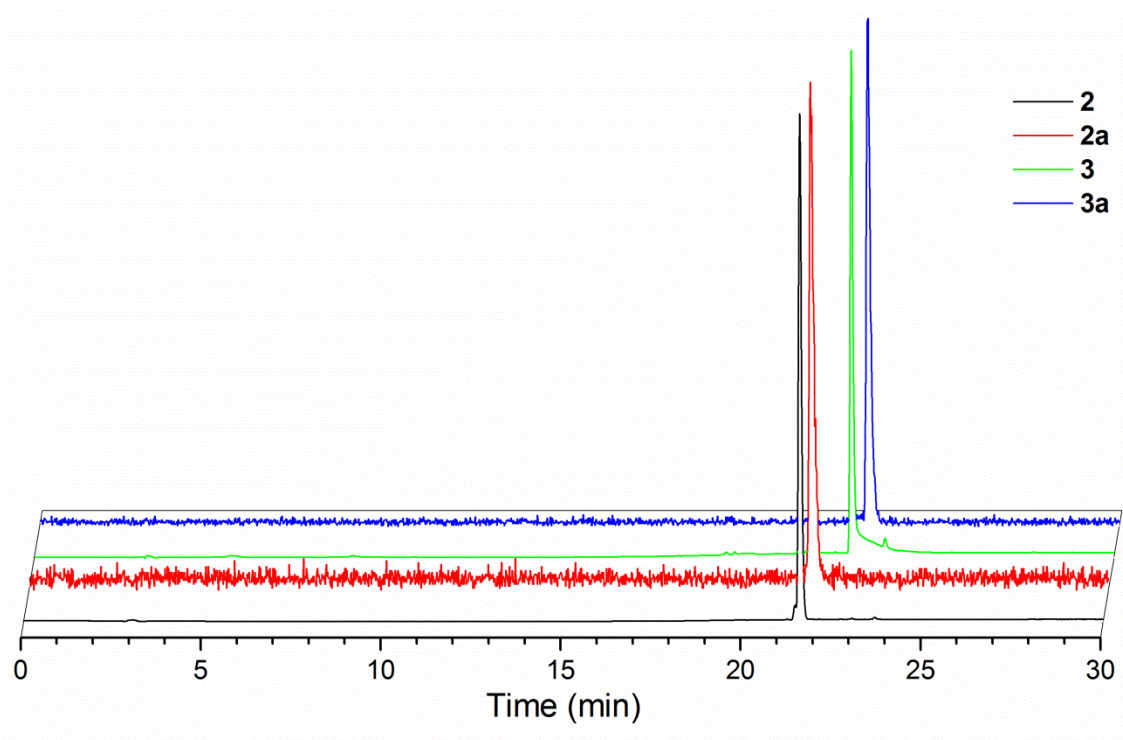

Figure S1. Normalized and offset UV and radio- HPLC chromatograms of complexes **2** ( $t_R = 21.6$  min), **2a** ( $t_R = 21.7$  min), **3** ( $t_R = 22.7$  min) and **3a** ( $t_R = 23.0$  min).

Table S1. Log *P* analysis of <sup>99m</sup>Tc complexes between ocatanol and pH 7.4 PBS.

| Complex   | Log <i>P</i> |
|-----------|--------------|
| <b>1a</b> | 0.82 ± 0.06  |
| <b>2a</b> | 1.06 ± 0.09  |
| <b>3a</b> | 1.23 ± 0.03  |
| <b>5a</b> | 1.06 ± 0.01  |
| <b>6a</b> | 1.13 ± 0.11  |
| <b>7a</b> | 1.44 ± 0.06  |

Table S2. Stability of <sup>99m</sup>Tc complexes to amino acid challenges. 1 mM cysteine or histidine, 10 mM pH 7.4 phosphate buffer, 37 °C.

| Complex   | Amino Acid | 4 h | 18 h |
|-----------|------------|-----|------|
| <b>2a</b> | Cysteine   | 99% | 99%  |
|           | Histidine  | 99% | 99%  |
| <b>3a</b> | Cysteine   | 99% | 99%  |
|           | Histidine  | 99% | 99%  |
| <b>6a</b> | Cysteine   | 99% | 5%   |
|           | Histidine  | 99% | 95%  |
| <b>7a</b> | Cysteine   | 99% | 99%  |
|           | Histidine  | 99% | 99%  |



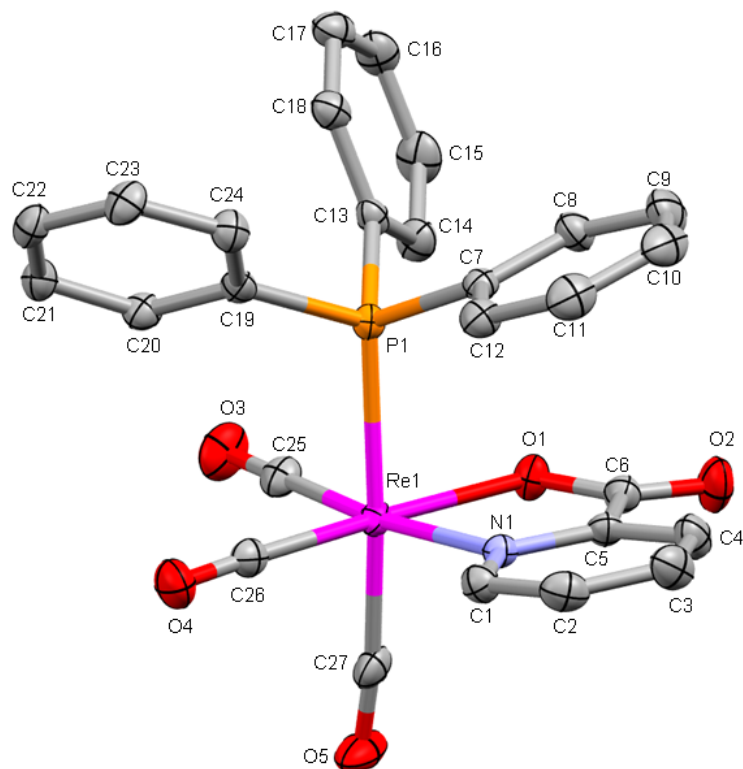

Table S3. Crystal data and structure refinement for **2**.

|                                                     |                                                                 |                              |
|-----------------------------------------------------|-----------------------------------------------------------------|------------------------------|
| Empirical formula                                   | C <sub>27</sub> H <sub>19</sub> NO <sub>5</sub> PRE             |                              |
| Formula weight                                      | 654.60                                                          |                              |
| Temperature                                         | 173(2) K                                                        |                              |
| Wavelength                                          | 0.71073 Å                                                       |                              |
| Crystal system, space group                         | Monoclinic, <i>P</i> 2 <sub>1</sub> / <i>c</i>                  |                              |
| Unit cell dimensions                                | <i>a</i> = 9.9334(15) Å                                         | $\alpha = 90^\circ$          |
|                                                     | <i>b</i> = 29.643(4) Å                                          | $\beta = 110.9850(10)^\circ$ |
|                                                     | <i>c</i> = 8.6911(13) Å                                         | $\gamma = 90^\circ$          |
| Volume                                              | 2389.4(6) Å <sup>3</sup>                                        |                              |
| Z, Calculated density                               | 4, 1.820 Mg/m <sup>3</sup>                                      |                              |
| Absorption coefficient                              | 5.192 mm <sup>-1</sup>                                          |                              |
| F(000)                                              | 1272                                                            |                              |
| Crystal size                                        | 0.40 x 0.10 x 0.10 mm                                           |                              |
| Theta range for data collection                     | 2.20 to 27.49°                                                  |                              |
| Limiting indices                                    | -12 ≤ <i>h</i> ≤ 12, -38 ≤ <i>k</i> ≤ 38, -11 ≤ <i>l</i> ≤ 11   |                              |
| Reflections collected / unique                      | 27882 / 5484 [ <i>R</i> <sub>int</sub> = 0.0377]                |                              |
| Completeness to theta = 27.49                       | 99.8%                                                           |                              |
| Absorption correction                               | Semi-empirical from equivalents                                 |                              |
| Max. and min. transmission                          | 0.62 and 0.38                                                   |                              |
| Refinement method                                   | Full-matrix least-squares on <i>F</i> <sup>2</sup>              |                              |
| Data / restraints / parameters                      | 5484 / 0 / 316                                                  |                              |
| Goodness-of-fit on <i>F</i> <sup>2</sup>            | 1.025                                                           |                              |
| Final <i>R</i> indices [ <i>I</i> > 2σ( <i>I</i> )] | <i>R</i> <sub>1</sub> = 0.0199, <i>wR</i> <sub>2</sub> = 0.0414 |                              |
| <i>R</i> indices (all data)                         | <i>R</i> <sub>1</sub> = 0.0242, <i>wR</i> <sub>2</sub> = 0.0429 |                              |
| Largest diff. peak and hole                         | 0.653 and -0.568 e.Å <sup>-3</sup>                              |                              |

Table S4. Atomic coordinates ( $\times 10^4$ ) and equivalent isotropic displacement parameters ( $\text{\AA}^2 \times 10^3$ ) for **2**. U(eq) is defined as one third of the trace of the orthogonalized  $U_{ij}$  tensor.

|       | x       | y       | z        | U(eq) |
|-------|---------|---------|----------|-------|
| Re(1) | 5741(1) | 806(1)  | 7084(1)  | 17(1) |
| P(1)  | 4047(1) | 1245(1) | 8045(1)  | 16(1) |
| O(1)  | 6636(2) | 1443(1) | 6783(2)  | 23(1) |
| O(2)  | 8428(2) | 1935(1) | 7895(3)  | 35(1) |
| O(3)  | 3329(2) | 751(1)  | 3686(2)  | 38(1) |
| O(4)  | 4786(2) | -97(1)  | 8080(3)  | 33(1) |
| O(5)  | 7473(2) | 248(1)  | 5430(3)  | 43(1) |
| N(1)  | 7451(2) | 940(1)  | 9466(2)  | 17(1) |
| C(1)  | 7786(3) | 683(1)  | 10837(3) | 23(1) |
| C(2)  | 8792(3) | 822(1)  | 12318(3) | 27(1) |
| C(3)  | 9497(3) | 1228(1) | 12415(4) | 32(1) |
| C(4)  | 9181(3) | 1485(1) | 11008(3) | 28(1) |
| C(5)  | 8157(3) | 1332(1) | 9556(3)  | 20(1) |
| C(6)  | 7740(3) | 1601(1) | 7973(3)  | 23(1) |
| C(7)  | 4933(3) | 1569(1) | 9909(3)  | 18(1) |
| C(8)  | 5233(3) | 2026(1) | 9783(3)  | 25(1) |
| C(9)  | 6043(3) | 2270(1) | 11173(4) | 35(1) |
| C(10) | 6552(3) | 2059(1) | 12697(4) | 35(1) |
| C(11) | 6257(3) | 1607(1) | 12840(3) | 31(1) |
| C(12) | 5472(3) | 1360(1) | 11450(3) | 24(1) |
| C(13) | 2902(3) | 1654(1) | 6580(3)  | 19(1) |
| C(14) | 3291(3) | 1829(1) | 5306(3)  | 26(1) |
| C(15) | 2401(3) | 2143(1) | 4216(4)  | 32(1) |
| C(16) | 1126(3) | 2281(1) | 4380(4)  | 30(1) |
| C(17) | 739(3)  | 2107(1) | 5641(3)  | 27(1) |
| C(18) | 1610(3) | 1798(1) | 6732(3)  | 23(1) |
| C(19) | 2675(3) | 895(1)  | 8387(3)  | 19(1) |
| C(20) | 1889(3) | 613(1)  | 7097(3)  | 22(1) |
| C(21) | 752(3)  | 360(1)  | 7193(3)  | 25(1) |
| C(22) | 410(3)  | 374(1)  | 8601(3)  | 25(1) |
| C(23) | 1193(3) | 643(1)  | 9903(3)  | 26(1) |
| C(24) | 2313(3) | 912(1)  | 9796(3)  | 24(1) |
| C(25) | 4237(3) | 772(1)  | 4965(3)  | 24(1) |
| C(26) | 5115(3) | 244(1)  | 7675(3)  | 22(1) |
| C(27) | 6913(3) | 462(1)  | 6120(3)  | 26(1) |

Table S5. Bond lengths [ $\text{\AA}$ ] and angles [ $^\circ$ ] for **2**.

---

|                   |            |                  |            |
|-------------------|------------|------------------|------------|
| Re(1)-C(26)       | 1.912(3)   | C(9)-C(10)       | 1.385(4)   |
| Re(1)-C(25)       | 1.914(3)   | C(9)-H(9)        | 0.95       |
| Re(1)-C(27)       | 1.947(3)   | C(10)-C(11)      | 1.388(4)   |
| Re(1)-O(1)        | 2.1439(18) | C(10)-H(10)      | 0.95       |
| Re(1)-N(1)        | 2.193(2)   | C(11)-C(12)      | 1.387(4)   |
| Re(1)-P(1)        | 2.4975(7)  | C(11)-H(11)      | 0.95       |
| P(1)-C(7)         | 1.816(3)   | C(12)-H(12)      | 0.95       |
| P(1)-C(19)        | 1.820(3)   | C(13)-C(14)      | 1.396(4)   |
| P(1)-C(13)        | 1.829(3)   | C(13)-C(18)      | 1.402(4)   |
| O(1)-C(6)         | 1.295(3)   | C(14)-C(15)      | 1.395(4)   |
| O(2)-C(6)         | 1.219(3)   | C(14)-H(14)      | 0.95       |
| O(3)-C(25)        | 1.155(3)   | C(15)-C(16)      | 1.386(4)   |
| O(4)-C(26)        | 1.154(3)   | C(15)-H(15)      | 0.95       |
| O(5)-C(27)        | 1.145(3)   | C(16)-C(17)      | 1.385(4)   |
| N(1)-C(5)         | 1.346(3)   | C(16)-H(16)      | 0.95       |
| N(1)-C(1)         | 1.351(3)   | C(17)-C(18)      | 1.379(4)   |
| C(1)-C(2)         | 1.380(4)   | C(17)-H(17)      | 0.95       |
| C(1)-H(1)         | 0.95       | C(18)-H(18)      | 0.95       |
| C(2)-C(3)         | 1.380(4)   | C(19)-C(20)      | 1.394(4)   |
| C(2)-H(2)         | 0.95       | C(19)-C(24)      | 1.394(4)   |
| C(3)-C(4)         | 1.377(4)   | C(20)-C(21)      | 1.382(4)   |
| C(3)-H(3)         | 0.95       | C(20)-H(20)      | 0.95       |
| C(4)-C(5)         | 1.384(4)   | C(21)-C(22)      | 1.383(4)   |
| C(4)-H(4)         | 0.95       | C(21)-H(21)      | 0.95       |
| C(5)-C(6)         | 1.513(4)   | C(22)-C(23)      | 1.375(4)   |
| C(7)-C(12)        | 1.397(4)   | C(22)-H(22)      | 0.95       |
| C(7)-C(8)         | 1.401(4)   | C(23)-C(24)      | 1.398(4)   |
| C(8)-C(9)         | 1.390(4)   | C(23)-H(23)      | 0.95       |
| C(8)-H(8)         | 0.95       | C(24)-H(24)      | 0.95       |
|                   |            |                  |            |
| C(26)-Re(1)-C(25) | 89.76(11)  | C(25)-Re(1)-P(1) | 87.83(8)   |
| C(26)-Re(1)-C(27) | 87.84(11)  | C(27)-Re(1)-P(1) | 174.35(8)  |
| C(25)-Re(1)-C(27) | 86.53(11)  | O(1)-Re(1)-P(1)  | 86.52(5)   |
| C(26)-Re(1)-O(1)  | 171.84(9)  | N(1)-Re(1)-P(1)  | 88.65(6)   |
| C(25)-Re(1)-O(1)  | 98.28(10)  | C(7)-P(1)-C(19)  | 107.89(12) |
| C(27)-Re(1)-O(1)  | 94.03(10)  | C(7)-P(1)-C(13)  | 104.65(12) |
| C(26)-Re(1)-N(1)  | 96.92(9)   | C(19)-P(1)-C(13) | 100.15(12) |
| C(25)-Re(1)-N(1)  | 172.57(10) | C(7)-P(1)-Re(1)  | 113.89(8)  |
| C(27)-Re(1)-N(1)  | 96.92(10)  | C(19)-P(1)-Re(1) | 113.00(9)  |
| O(1)-Re(1)-N(1)   | 74.98(7)   | C(13)-P(1)-Re(1) | 116.00(9)  |
| C(26)-Re(1)-P(1)  | 92.40(8)   | C(6)-O(1)-Re(1)  | 119.33(16) |

|                   |            |                   |            |
|-------------------|------------|-------------------|------------|
| C(5)-N(1)-C(1)    | 118.5(2)   | C(15)-C(14)-H(14) | 120.1      |
| C(5)-N(1)-Re(1)   | 114.99(16) | C(13)-C(14)-H(14) | 120.1      |
| C(1)-N(1)-Re(1)   | 126.43(18) | C(16)-C(15)-C(14) | 120.5(3)   |
| N(1)-C(1)-C(2)    | 121.5(3)   | C(16)-C(15)-H(15) | 119.7      |
| N(1)-C(1)-H(1)    | 119.3      | C(14)-C(15)-H(15) | 119.7      |
| C(2)-C(1)-H(1)    | 119.3      | C(17)-C(16)-C(15) | 119.6(3)   |
| C(1)-C(2)-C(3)    | 120.0(3)   | C(17)-C(16)-H(16) | 120.2      |
| C(1)-C(2)-H(2)    | 120        | C(15)-C(16)-H(16) | 120.2      |
| C(3)-C(2)-H(2)    | 120        | C(18)-C(17)-C(16) | 120.6(3)   |
| C(4)-C(3)-C(2)    | 118.6(3)   | C(18)-C(17)-H(17) | 119.7      |
| C(4)-C(3)-H(3)    | 120.7      | C(16)-C(17)-H(17) | 119.7      |
| C(2)-C(3)-H(3)    | 120.7      | C(17)-C(18)-C(13) | 120.5(3)   |
| C(3)-C(4)-C(5)    | 119.2(3)   | C(17)-C(18)-H(18) | 119.8      |
| C(3)-C(4)-H(4)    | 120.4      | C(13)-C(18)-H(18) | 119.8      |
| C(5)-C(4)-H(4)    | 120.4      | C(20)-C(19)-C(24) | 118.8(2)   |
| N(1)-C(5)-C(4)    | 122.3(2)   | C(20)-C(19)-P(1)  | 116.58(19) |
| N(1)-C(5)-C(6)    | 115.8(2)   | C(24)-C(19)-P(1)  | 124.6(2)   |
| C(4)-C(5)-C(6)    | 121.9(2)   | C(21)-C(20)-C(19) | 120.7(2)   |
| O(2)-C(6)-O(1)    | 125.4(3)   | C(21)-C(20)-H(20) | 119.6      |
| O(2)-C(6)-C(5)    | 120.1(2)   | C(19)-C(20)-H(20) | 119.6      |
| O(1)-C(6)-C(5)    | 114.4(2)   | C(20)-C(21)-C(22) | 120.2(3)   |
| C(12)-C(7)-C(8)   | 119.0(2)   | C(20)-C(21)-H(21) | 119.9      |
| C(12)-C(7)-P(1)   | 121.2(2)   | C(22)-C(21)-H(21) | 119.9      |
| C(8)-C(7)-P(1)    | 119.34(19) | C(23)-C(22)-C(21) | 119.9(3)   |
| C(9)-C(8)-C(7)    | 120.5(3)   | C(23)-C(22)-H(22) | 120        |
| C(9)-C(8)-H(8)    | 119.8      | C(21)-C(22)-H(22) | 120        |
| C(7)-C(8)-H(8)    | 119.8      | C(22)-C(23)-C(24) | 120.3(3)   |
| C(10)-C(9)-C(8)   | 119.8(3)   | C(22)-C(23)-H(23) | 119.9      |
| C(10)-C(9)-H(9)   | 120.1      | C(24)-C(23)-H(23) | 119.9      |
| C(8)-C(9)-H(9)    | 120.1      | C(19)-C(24)-C(23) | 120.0(3)   |
| C(9)-C(10)-C(11)  | 120.3(3)   | C(19)-C(24)-H(24) | 120        |
| C(9)-C(10)-H(10)  | 119.9      | C(23)-C(24)-H(24) | 120        |
| C(11)-C(10)-H(10) | 119.9      | O(3)-C(25)-Re(1)  | 180.0(3)   |
| C(12)-C(11)-C(10) | 120.1(3)   | O(4)-C(26)-Re(1)  | 177.4(2)   |
| C(12)-C(11)-H(11) | 119.9      | O(5)-C(27)-Re(1)  | 173.0(2)   |
| C(10)-C(11)-H(11) | 119.9      |                   |            |
| C(11)-C(12)-C(7)  | 120.3(3)   |                   |            |
| C(11)-C(12)-H(12) | 119.9      |                   |            |
| C(7)-C(12)-H(12)  | 119.9      |                   |            |
| C(14)-C(13)-C(18) | 119.0(2)   |                   |            |
| C(14)-C(13)-P(1)  | 121.2(2)   |                   |            |
| C(18)-C(13)-P(1)  | 119.8(2)   |                   |            |
| C(15)-C(14)-C(13) | 119.9(3)   |                   |            |

Table S6. Anisotropic displacement parameters ( $\text{\AA}^2 \times 10^3$ ) for **2**. The anisotropic displacement factor exponent takes the form:  $-2 \pi^2 [ h^2 a^{*2} U11 + \dots + 2 h k a^* b^* U12 ]$

|       | U11   | U22   | U33   | U23    | U13   | U12    |
|-------|-------|-------|-------|--------|-------|--------|
| Re(1) | 16(1) | 20(1) | 14(1) | -1(1)  | 5(1)  | -2(1)  |
| P(1)  | 17(1) | 18(1) | 14(1) | 1(1)   | 5(1)  | -1(1)  |
| O(1)  | 22(1) | 26(1) | 19(1) | 5(1)   | 4(1)  | -5(1)  |
| O(2)  | 30(1) | 28(1) | 42(1) | 10(1)  | 5(1)  | -10(1) |
| O(3)  | 32(1) | 57(2) | 18(1) | -3(1)  | 0(1)  | -4(1)  |
| O(4)  | 38(1) | 24(1) | 37(1) | 1(1)   | 13(1) | -5(1)  |
| O(5)  | 25(1) | 62(2) | 41(1) | -26(1) | 12(1) | 1(1)   |
| N(1)  | 17(1) | 19(1) | 15(1) | 0(1)   | 5(1)  | 2(1)   |
| C(1)  | 24(1) | 21(1) | 22(1) | 1(1)   | 8(1)  | 0(1)   |
| C(2)  | 31(2) | 30(2) | 19(1) | 3(1)   | 6(1)  | 8(1)   |
| C(3)  | 29(2) | 32(2) | 23(2) | -6(1)  | -4(1) | 4(1)   |
| C(4)  | 27(2) | 23(2) | 26(2) | -2(1)  | 1(1)  | -2(1)  |
| C(5)  | 18(1) | 19(1) | 22(1) | 3(1)   | 5(1)  | 3(1)   |
| C(6)  | 21(1) | 23(1) | 24(1) | 1(1)   | 8(1)  | -1(1)  |
| C(7)  | 17(1) | 21(1) | 16(1) | -3(1)  | 6(1)  | 1(1)   |
| C(8)  | 28(2) | 20(1) | 24(1) | -2(1)  | 6(1)  | 0(1)   |
| C(9)  | 35(2) | 26(2) | 37(2) | -11(1) | 5(1)  | -3(1)  |
| C(10) | 27(2) | 46(2) | 26(2) | -18(1) | 4(1)  | 2(1)   |
| C(11) | 30(2) | 44(2) | 18(1) | -3(1)  | 7(1)  | 3(1)   |
| C(12) | 24(1) | 28(2) | 20(1) | -1(1)  | 8(1)  | 0(1)   |
| C(13) | 21(1) | 16(1) | 17(1) | -1(1)  | 2(1)  | -1(1)  |
| C(14) | 26(2) | 24(2) | 28(2) | 7(1)   | 9(1)  | 0(1)   |
| C(15) | 36(2) | 30(2) | 26(2) | 12(1)  | 6(1)  | -3(1)  |
| C(16) | 30(2) | 25(2) | 27(2) | 5(1)   | 1(1)  | 2(1)   |
| C(17) | 26(2) | 26(2) | 25(1) | -5(1)  | 4(1)  | 6(1)   |
| C(18) | 26(1) | 23(1) | 18(1) | -1(1)  | 5(1)  | 2(1)   |
| C(19) | 19(1) | 16(1) | 20(1) | 4(1)   | 6(1)  | 2(1)   |
| C(20) | 23(1) | 26(1) | 20(1) | -2(1)  | 9(1)  | 0(1)   |
| C(21) | 22(1) | 25(2) | 25(1) | -3(1)  | 5(1)  | -3(1)  |
| C(22) | 20(1) | 27(2) | 26(1) | 4(1)   | 6(1)  | -4(1)  |
| C(23) | 25(2) | 35(2) | 22(1) | 2(1)   | 13(1) | -3(1)  |
| C(24) | 25(1) | 26(2) | 20(1) | -1(1)  | 8(1)  | -2(1)  |
| C(25) | 23(1) | 31(2) | 20(1) | -1(1)  | 11(1) | -2(1)  |
| C(26) | 20(1) | 26(2) | 17(1) | -4(1)  | 3(1)  | 1(1)   |
| C(27) | 16(1) | 36(2) | 24(1) | -4(1)  | 5(1)  | -4(1)  |

Table S7. Hydrogen coordinates ( $\times 10^4$ ) and isotropic displacement parameters ( $\text{\AA}^2 \times 10^3$ ) for **2**.

|       | x     | y    | z     | U(eq) |
|-------|-------|------|-------|-------|
| H(1)  | 7319  | 401  | 10780 | 27    |
| H(2)  | 8998  | 639  | 13270 | 33    |
| H(3)  | 10186 | 1329 | 13430 | 38    |
| H(4)  | 9659  | 1764 | 11035 | 33    |
| H(8)  | 4881  | 2171 | 8739  | 30    |
| H(9)  | 6247  | 2579 | 11079 | 42    |
| H(10) | 7106  | 2225 | 13648 | 42    |
| H(11) | 6593  | 1465 | 13890 | 37    |
| H(12) | 5300  | 1048 | 11548 | 28    |
| H(14) | 4160  | 1734 | 5182  | 31    |
| H(15) | 2670  | 2263 | 3354  | 38    |
| H(16) | 523   | 2495 | 3633  | 36    |
| H(17) | -135  | 2201 | 5755  | 33    |
| H(18) | 1334  | 1681 | 7592  | 27    |
| H(20) | 2137  | 594  | 6140  | 27    |
| H(21) | 204   | 177  | 6289  | 30    |
| H(22) | -366  | 198  | 8668  | 30    |
| H(23) | 972   | 646  | 10880 | 31    |
| H(24) | 2828  | 1105 | 10683 | 28    |

Table S8. Torsion angles [°] for **2**.

|                        |             |                         |            |
|------------------------|-------------|-------------------------|------------|
| C(26)-Re(1)-P(1)-C(7)  | 109.44(12)  | Re(1)-O(1)-C(6)-O(2)    | 172.6(2)   |
| C(25)-Re(1)-P(1)-C(7)  | -160.90(12) | Re(1)-O(1)-C(6)-C(5)    | -7.4(3)    |
| C(27)-Re(1)-P(1)-C(7)  | -158.3(9)   | N(1)-C(5)-C(6)-O(2)     | -172.2(3)  |
| O(1)-Re(1)-P(1)-C(7)   | -62.47(11)  | C(4)-C(5)-C(6)-O(2)     | 8.9(4)     |
| N(1)-Re(1)-P(1)-C(7)   | 12.56(11)   | N(1)-C(5)-C(6)-O(1)     | 7.8(3)     |
| C(26)-Re(1)-P(1)-C(19) | -14.14(12)  | C(4)-C(5)-C(6)-O(1)     | -171.1(2)  |
| C(25)-Re(1)-P(1)-C(19) | 75.53(12)   | C(19)-P(1)-C(7)-C(12)   | 50.6(2)    |
| C(27)-Re(1)-P(1)-C(19) | 78.2(9)     | C(13)-P(1)-C(7)-C(12)   | 156.6(2)   |
| O(1)-Re(1)-P(1)-C(19)  | 173.96(10)  | Re(1)-P(1)-C(7)-C(12)   | -75.7(2)   |
| N(1)-Re(1)-P(1)-C(19)  | -111.01(11) | C(19)-P(1)-C(7)-C(8)    | -137.0(2)  |
| C(26)-Re(1)-P(1)-C(13) | -128.98(12) | C(13)-P(1)-C(7)-C(8)    | -31.0(2)   |
| C(25)-Re(1)-P(1)-C(13) | -39.32(12)  | Re(1)-P(1)-C(7)-C(8)    | 96.7(2)    |
| C(27)-Re(1)-P(1)-C(13) | -36.7(9)    | C(12)-C(7)-C(8)-C(9)    | -0.6(4)    |
| O(1)-Re(1)-P(1)-C(13)  | 59.11(10)   | P(1)-C(7)-C(8)-C(9)     | -173.2(2)  |
| N(1)-Re(1)-P(1)-C(13)  | 134.14(11)  | C(7)-C(8)-C(9)-C(10)    | -0.3(4)    |
| C(26)-Re(1)-O(1)-C(6)  | 11.0(7)     | C(8)-C(9)-C(10)-C(11)   | 0.0(5)     |
| C(25)-Re(1)-O(1)-C(6)  | -179.1(2)   | C(9)-C(10)-C(11)-C(12)  | 1.2(5)     |
| C(27)-Re(1)-O(1)-C(6)  | -92.1(2)    | C(10)-C(11)-C(12)-C(7)  | -2.1(4)    |
| N(1)-Re(1)-O(1)-C(6)   | 4.02(18)    | C(8)-C(7)-C(12)-C(11)   | 1.9(4)     |
| P(1)-Re(1)-O(1)-C(6)   | 93.56(19)   | P(1)-C(7)-C(12)-C(11)   | 174.2(2)   |
| C(26)-Re(1)-N(1)-C(5)  | -178.41(19) | C(7)-P(1)-C(13)-C(14)   | 103.8(2)   |
| C(25)-Re(1)-N(1)-C(5)  | -24.4(8)    | C(19)-P(1)-C(13)-C(14)  | -144.5(2)  |
| C(27)-Re(1)-N(1)-C(5)  | 92.94(19)   | Re(1)-P(1)-C(13)-C(14)  | -22.6(2)   |
| O(1)-Re(1)-N(1)-C(5)   | 0.61(17)    | C(7)-P(1)-C(13)-C(18)   | -76.0(2)   |
| P(1)-Re(1)-N(1)-C(5)   | -86.15(17)  | C(19)-P(1)-C(13)-C(18)  | 35.6(2)    |
| C(26)-Re(1)-N(1)-C(1)  | -2.6(2)     | Re(1)-P(1)-C(13)-C(18)  | 157.57(18) |
| C(25)-Re(1)-N(1)-C(1)  | 151.4(7)    | C(18)-C(13)-C(14)-C(15) | 0.4(4)     |
| C(27)-Re(1)-N(1)-C(1)  | -91.2(2)    | P(1)-C(13)-C(14)-C(15)  | -179.5(2)  |
| O(1)-Re(1)-N(1)-C(1)   | 176.4(2)    | C(13)-C(14)-C(15)-C(16) | -0.4(4)    |
| P(1)-Re(1)-N(1)-C(1)   | 89.7(2)     | C(14)-C(15)-C(16)-C(17) | 0.2(4)     |
| C(5)-N(1)-C(1)-C(2)    | 2.1(4)      | C(15)-C(16)-C(17)-C(18) | 0.1(4)     |
| Re(1)-N(1)-C(1)-C(2)   | -173.5(2)   | C(16)-C(17)-C(18)-C(13) | -0.1(4)    |
| N(1)-C(1)-C(2)-C(3)    | -1.0(4)     | C(14)-C(13)-C(18)-C(17) | -0.1(4)    |
| C(1)-C(2)-C(3)-C(4)    | -0.5(4)     | P(1)-C(13)-C(18)-C(17)  | 179.7(2)   |
| C(2)-C(3)-C(4)-C(5)    | 0.9(4)      | C(7)-P(1)-C(19)-C(20)   | -178.8(2)  |
| C(1)-N(1)-C(5)-C(4)    | -1.7(4)     | C(13)-P(1)-C(19)-C(20)  | 72.1(2)    |
| Re(1)-N(1)-C(5)-C(4)   | 174.4(2)    | Re(1)-P(1)-C(19)-C(20)  | -51.9(2)   |
| C(1)-N(1)-C(5)-C(6)    | 179.4(2)    | C(7)-P(1)-C(19)-C(24)   | 5.1(3)     |
| Re(1)-N(1)-C(5)-C(6)   | -4.4(3)     | C(13)-P(1)-C(19)-C(24)  | -104.1(2)  |
| C(3)-C(4)-C(5)-N(1)    | 0.2(4)      | Re(1)-P(1)-C(19)-C(24)  | 131.9(2)   |
| C(3)-C(4)-C(5)-C(6)    | 179.0(3)    | C(24)-C(19)-C(20)-C(21) | 1.4(4)     |

|                         |           |                        |          |
|-------------------------|-----------|------------------------|----------|
| P(1)-C(19)-C(20)-C(21)  | -175.0(2) | P(1)-Re(1)-C(25)-O(3)  | -62(100) |
| C(19)-C(20)-C(21)-C(22) | -2.1(4)   | C(25)-Re(1)-C(26)-O(4) | 164(5)   |
| C(20)-C(21)-C(22)-C(23) | 0.6(4)    | C(27)-Re(1)-C(26)-O(4) | 77(5)    |
| C(21)-C(22)-C(23)-C(24) | 1.6(4)    | O(1)-Re(1)-C(26)-O(4)  | -26(6)   |
| C(20)-C(19)-C(24)-C(23) | 0.8(4)    | N(1)-Re(1)-C(26)-O(4)  | -20(5)   |
| P(1)-C(19)-C(24)-C(23)  | 176.9(2)  | P(1)-Re(1)-C(26)-O(4)  | -108(5)  |
| C(22)-C(23)-C(24)-C(19) | -2.3(4)   | C(26)-Re(1)-C(27)-O(5) | 71(2)    |
| C(26)-Re(1)-C(25)-O(3)  | 30(100)   | C(25)-Re(1)-C(27)-O(5) | -19(2)   |
| C(27)-Re(1)-C(25)-O(3)  | 118(100)  | O(1)-Re(1)-C(27)-O(5)  | -117(2)  |
| O(1)-Re(1)-C(25)-O(3)   | -148(100) | N(1)-Re(1)-C(27)-O(5)  | 167(2)   |
| N(1)-Re(1)-C(25)-O(3)   | -124(100) | P(1)-Re(1)-C(27)-O(5)  | -22(3)   |

---



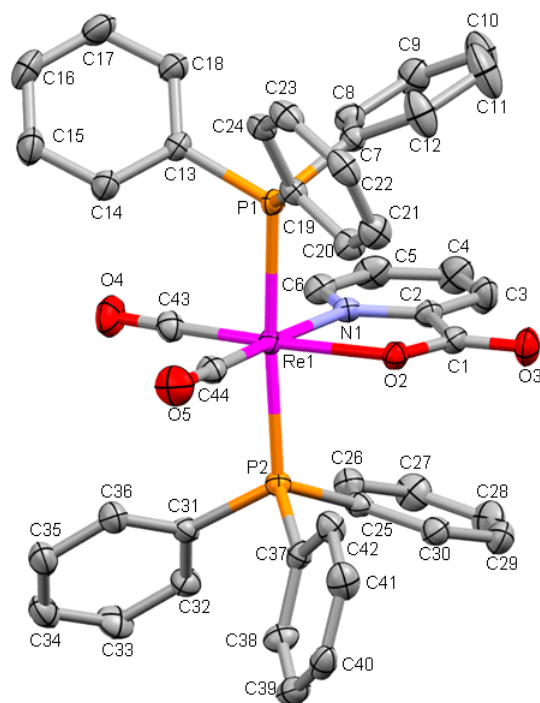

Table S9. Crystal data and structure refinement for **3**.

|                                   |                                                                                                                                                                                 |
|-----------------------------------|---------------------------------------------------------------------------------------------------------------------------------------------------------------------------------|
| Empirical formula                 | C <sub>46</sub> H <sub>36</sub> Cl <sub>6</sub> NO <sub>4</sub> P <sub>2</sub> Re                                                                                               |
| Formula weight                    | 1127.60                                                                                                                                                                         |
| Temperature                       | 173(2) K                                                                                                                                                                        |
| Wavelength                        | 0.71073 Å                                                                                                                                                                       |
| Crystal system, space group       | Triclinic, <i>P</i> -1                                                                                                                                                          |
| Unit cell dimensions              | <i>a</i> = 10.8612(3) Å, $\alpha$ = 77.9590(10) $^\circ$<br><i>b</i> = 14.6446(5) Å, $\beta$ = 82.0390(10) $^\circ$<br><i>c</i> = 15.5216(5) Å, $\gamma$ = 72.2150(10) $^\circ$ |
| Volume                            | 2291.70(12) Å <sup>3</sup>                                                                                                                                                      |
| Z, Calculated density             | 2, 1.634 Mg/m <sup>3</sup>                                                                                                                                                      |
| Absorption coefficient            | 3.115 mm <sup>-1</sup>                                                                                                                                                          |
| F(000)                            | 1116                                                                                                                                                                            |
| Crystal size                      | 0.50 x 0.30 x 0.25 mm                                                                                                                                                           |
| Theta range for data collection   | 1.82 to 27.61 $^\circ$                                                                                                                                                          |
| Limiting indices                  | -14 ≤ <i>h</i> ≤ 14, -19 ≤ <i>k</i> ≤ 19, -20 ≤ <i>l</i> ≤ 20                                                                                                                   |
| Reflections collected / unique    | 21139 / 10429 [R(int) = 0.0210]                                                                                                                                                 |
| Completeness to theta = 27.61     | 98.2 %                                                                                                                                                                          |
| Absorption correction             | Semi-empirical from equivalents                                                                                                                                                 |
| Max. and min. transmission        | 0.51 and 0.40                                                                                                                                                                   |
| Refinement method                 | Full-matrix least-squares on F <sup>2</sup>                                                                                                                                     |
| Data / restraints / parameters    | 10429 / 0 / 541                                                                                                                                                                 |
| Goodness-of-fit on F <sup>2</sup> | 1.042                                                                                                                                                                           |
| Final R indices [I > 2σ(I)]       | R <sub>1</sub> = 0.0230, wR <sub>2</sub> = 0.0555                                                                                                                               |
| R indices (all data)              | R <sub>1</sub> = 0.0259, wR <sub>2</sub> = 0.0569                                                                                                                               |
| Largest diff. peak and hole       | 0.820 and -1.267 e.Å <sup>-3</sup>                                                                                                                                              |

Table S10. Atomic coordinates ( $\times 10^4$ ) and equivalent isotropic displacement parameters ( $\text{Å}^2 \times 10^3$ ) for **3**. U(eq) is defined as one third of the trace of the orthogonalized  $U^{ij}$  tensor.

|       | x        | y       | z        | U(eq)  |
|-------|----------|---------|----------|--------|
| Re(1) | 2726(1)  | 3538(1) | 6486(1)  | 17(1)  |
| Cl(1) | 4479(2)  | 808(1)  | 10962(1) | 94(1)  |
| Cl(2) | 3420(1)  | 2877(1) | 10412(1) | 57(1)  |
| Cl(3) | 5772(1)  | 1845(1) | 9505(1)  | 72(1)  |
| Cl(4) | 1011(2)  | 152(1)  | 10851(1) | 101(1) |
| Cl(5) | -1302(1) | 1703(1) | 10454(1) | 58(1)  |
| Cl(6) | 547(1)   | 1934(1) | 11496(1) | 56(1)  |
| P(1)  | 3751(1)  | 2082(1) | 5860(1)  | 18(1)  |
| P(2)  | 1821(1)  | 4912(1) | 7237(1)  | 18(1)  |
| O(2)  | 2977(2)  | 2654(1) | 7793(1)  | 21(1)  |
| O(3)  | 2098(2)  | 1791(2) | 8931(1)  | 33(1)  |
| O(4)  | 1840(2)  | 4737(2) | 4713(1)  | 38(1)  |
| O(5)  | 5313(2)  | 4032(2) | 6059(1)  | 40(1)  |
| N(1)  | 948(2)   | 3107(2) | 6875(1)  | 19(1)  |
| C(1)  | 2069(3)  | 2293(2) | 8185(2)  | 23(1)  |
| C(2)  | 897(3)   | 2533(2) | 7679(2)  | 22(1)  |
| C(3)  | -180(3)  | 2213(2) | 8005(2)  | 34(1)  |
| C(4)  | -1248(3) | 2504(2) | 7515(2)  | 38(1)  |
| C(5)  | -1201(3) | 3096(2) | 6705(2)  | 32(1)  |
| C(6)  | -93(3)   | 3375(2) | 6399(2)  | 26(1)  |
| C(7)  | 2963(2)  | 1108(2) | 6206(2)  | 21(1)  |
| C(8)  | 1720(3)  | 1254(2) | 5946(2)  | 25(1)  |
| C(9)  | 1051(3)  | 572(2)  | 6272(2)  | 34(1)  |
| C(10) | 1599(3)  | -269(2) | 6848(2)  | 42(1)  |
| C(11) | 2823(4)  | -427(3) | 7099(3)  | 53(1)  |
| C(12) | 3501(3)  | 262(2)  | 6786(2)  | 40(1)  |
| C(13) | 3929(2)  | 2278(2) | 4654(2)  | 21(1)  |
| C(14) | 4411(3)  | 3048(2) | 4213(2)  | 28(1)  |
| C(15) | 4554(3)  | 3244(2) | 3296(2)  | 35(1)  |
| C(16) | 4204(3)  | 2689(2) | 2815(2)  | 38(1)  |
| C(17) | 3730(3)  | 1925(2) | 3237(2)  | 37(1)  |
| C(18) | 3608(3)  | 1709(2) | 4156(2)  | 28(1)  |
| C(19) | 5397(2)  | 1441(2) | 6168(2)  | 20(1)  |
| C(20) | 5690(3)  | 1405(2) | 7026(2)  | 27(1)  |
| C(21) | 6877(3)  | 827(2)  | 7321(2)  | 30(1)  |
| C(22) | 7792(3)  | 295(2)  | 6766(2)  | 29(1)  |
| C(23) | 7527(3)  | 345(2)  | 5907(2)  | 28(1)  |
| C(24) | 6335(2)  | 910(2)  | 5608(2)  | 23(1)  |

|       |          |         |          |       |
|-------|----------|---------|----------|-------|
| C(25) | 402(2)   | 4814(2) | 7987(2)  | 21(1) |
| C(26) | -804(3)  | 5001(2) | 7659(2)  | 25(1) |
| C(27) | -1849(3) | 4832(2) | 8220(2)  | 33(1) |
| C(28) | -1702(3) | 4460(2) | 9105(2)  | 35(1) |
| C(29) | -513(3)  | 4252(2) | 9438(2)  | 31(1) |
| C(30) | 536(3)   | 4432(2) | 8886(2)  | 25(1) |
| C(31) | 1341(2)  | 6120(2) | 6548(2)  | 21(1) |
| C(32) | 206(3)   | 6837(2) | 6713(2)  | 27(1) |
| C(33) | -16(3)   | 7770(2) | 6224(2)  | 33(1) |
| C(34) | 895(3)   | 8000(2) | 5573(2)  | 33(1) |
| C(35) | 2027(3)  | 7287(2) | 5392(2)  | 33(1) |
| C(36) | 2243(3)  | 6352(2) | 5868(2)  | 27(1) |
| C(37) | 2915(2)  | 5112(2) | 7938(2)  | 21(1) |
| C(38) | 2675(3)  | 6018(2) | 8185(2)  | 28(1) |
| C(39) | 3535(3)  | 6179(2) | 8676(2)  | 30(1) |
| C(40) | 4642(3)  | 5447(2) | 8924(2)  | 29(1) |
| C(41) | 4873(3)  | 4542(2) | 8699(2)  | 31(1) |
| C(42) | 4015(3)  | 4373(2) | 8205(2)  | 26(1) |
| C(43) | 2206(3)  | 4286(2) | 5385(2)  | 24(1) |
| C(44) | 4327(2)  | 3846(2) | 6230(2)  | 23(1) |
| C(45) | 4262(4)  | 1769(3) | 10058(2) | 46(1) |
| C(46) | 348(3)   | 1404(2) | 10627(2) | 39(1) |

---

Table S11. Bond lengths [Å] and angles [°] for **3**.

---

|             |            |             |          |
|-------------|------------|-------------|----------|
| Re(1)-C(43) | 1.884(3)   | C(11)-C(12) | 1.394(4) |
| Re(1)-C(44) | 1.897(3)   | C(11)-H(11) | 0.95     |
| Re(1)-O(2)  | 2.1701(16) | C(12)-H(12) | 0.95     |
| Re(1)-N(1)  | 2.181(2)   | C(13)-C(18) | 1.390(4) |
| Re(1)-P(2)  | 2.4130(6)  | C(13)-C(14) | 1.398(3) |
| Re(1)-P(1)  | 2.4182(6)  | C(14)-C(15) | 1.388(4) |
| Cl(1)-C(45) | 1.752(4)   | C(14)-H(14) | 0.95     |
| Cl(2)-C(45) | 1.759(4)   | C(15)-C(16) | 1.374(4) |
| Cl(3)-C(45) | 1.767(4)   | C(15)-H(15) | 0.95     |
| Cl(4)-C(46) | 1.731(3)   | C(16)-C(17) | 1.377(4) |
| Cl(5)-C(46) | 1.756(3)   | C(16)-H(16) | 0.95     |
| Cl(6)-C(46) | 1.756(3)   | C(17)-C(18) | 1.391(4) |
| P(1)-C(19)  | 1.825(3)   | C(17)-H(17) | 0.95     |
| P(1)-C(13)  | 1.826(2)   | C(18)-H(18) | 0.95     |
| P(1)-C(7)   | 1.831(2)   | C(19)-C(24) | 1.397(3) |
| P(2)-C(25)  | 1.822(2)   | C(19)-C(20) | 1.399(4) |
| P(2)-C(31)  | 1.829(2)   | C(20)-C(21) | 1.387(4) |
| P(2)-C(37)  | 1.840(3)   | C(20)-H(20) | 0.95     |
| O(2)-C(1)   | 1.281(3)   | C(21)-C(22) | 1.381(4) |
| O(3)-C(1)   | 1.234(3)   | C(21)-H(21) | 0.95     |
| O(4)-C(43)  | 1.161(3)   | C(22)-C(23) | 1.384(4) |
| O(5)-C(44)  | 1.167(3)   | C(22)-H(22) | 0.95     |
| N(1)-C(6)   | 1.348(3)   | C(23)-C(24) | 1.389(4) |
| N(1)-C(2)   | 1.356(3)   | C(23)-H(23) | 0.95     |
| C(1)-C(2)   | 1.500(4)   | C(24)-H(24) | 0.95     |
| C(2)-C(3)   | 1.384(4)   | C(25)-C(26) | 1.399(4) |
| C(3)-C(4)   | 1.383(4)   | C(25)-C(30) | 1.400(3) |
| C(3)-H(3)   | 0.95       | C(26)-C(27) | 1.384(4) |
| C(4)-C(5)   | 1.374(4)   | C(26)-H(26) | 0.95     |
| C(4)-H(4)   | 0.95       | C(27)-C(28) | 1.380(4) |
| C(5)-C(6)   | 1.379(4)   | C(27)-H(27) | 0.95     |
| C(5)-H(5)   | 0.95       | C(28)-C(29) | 1.381(4) |
| C(6)-H(6)   | 0.95       | C(28)-H(28) | 0.95     |
| C(7)-C(12)  | 1.388(4)   | C(29)-C(30) | 1.387(4) |
| C(7)-C(8)   | 1.404(4)   | C(29)-H(29) | 0.95     |
| C(8)-C(9)   | 1.383(4)   | C(30)-H(30) | 0.95     |
| C(8)-H(8)   | 0.95       | C(31)-C(32) | 1.386(4) |
| C(9)-C(10)  | 1.383(4)   | C(31)-C(36) | 1.399(3) |
| C(9)-H(9)   | 0.95       | C(32)-C(33) | 1.384(4) |
| C(10)-C(11) | 1.375(5)   | C(32)-H(32) | 0.95     |
| C(10)-H(10) | 0.95       | C(33)-C(34) | 1.378(4) |

|                   |            |                   |            |
|-------------------|------------|-------------------|------------|
| C(33)-H(33)       | 0.95       | C(31)-P(2)-C(37)  | 100.03(11) |
| C(34)-C(35)       | 1.386(4)   | C(25)-P(2)-Re(1)  | 113.15(8)  |
| C(34)-H(34)       | 0.95       | C(31)-P(2)-Re(1)  | 117.23(8)  |
| C(35)-C(36)       | 1.380(4)   | C(37)-P(2)-Re(1)  | 115.35(9)  |
| C(35)-H(35)       | 0.95       | C(1)-O(2)-Re(1)   | 119.15(16) |
| C(36)-H(36)       | 0.95       | C(6)-N(1)-C(2)    | 118.2(2)   |
| C(37)-C(42)       | 1.390(4)   | C(6)-N(1)-Re(1)   | 125.94(16) |
| C(37)-C(38)       | 1.397(4)   | C(2)-N(1)-Re(1)   | 115.86(16) |
| C(38)-C(39)       | 1.384(4)   | O(3)-C(1)-O(2)    | 124.7(2)   |
| C(38)-H(38)       | 0.95       | O(3)-C(1)-C(2)    | 119.9(2)   |
| C(39)-C(40)       | 1.382(4)   | O(2)-C(1)-C(2)    | 115.4(2)   |
| C(39)-H(39)       | 0.95       | N(1)-C(2)-C(3)    | 121.6(2)   |
| C(40)-C(41)       | 1.380(4)   | N(1)-C(2)-C(1)    | 115.3(2)   |
| C(40)-H(40)       | 0.95       | C(3)-C(2)-C(1)    | 123.1(2)   |
| C(41)-C(42)       | 1.391(4)   | C(4)-C(3)-C(2)    | 119.6(3)   |
| C(41)-H(41)       | 0.95       | C(4)-C(3)-H(3)    | 120.2      |
| C(42)-H(42)       | 0.95       | C(2)-C(3)-H(3)    | 120.2      |
| C(45)-H(45)       | 1          | C(5)-C(4)-C(3)    | 118.8(3)   |
| C(46)-H(46)       | 1          | C(5)-C(4)-H(4)    | 120.6      |
|                   |            | C(3)-C(4)-H(4)    | 120.6      |
| C(43)-Re(1)-C(44) | 88.96(11)  | C(4)-C(5)-C(6)    | 119.4(3)   |
| C(43)-Re(1)-O(2)  | 169.83(9)  | C(4)-C(5)-H(5)    | 120.3      |
| C(44)-Re(1)-O(2)  | 101.16(9)  | C(6)-C(5)-H(5)    | 120.3      |
| C(43)-Re(1)-N(1)  | 95.56(9)   | N(1)-C(6)-C(5)    | 122.4(2)   |
| C(44)-Re(1)-N(1)  | 175.46(9)  | N(1)-C(6)-H(6)    | 118.8      |
| O(2)-Re(1)-N(1)   | 74.33(7)   | C(5)-C(6)-H(6)    | 118.8      |
| C(43)-Re(1)-P(2)  | 92.73(8)   | C(12)-C(7)-C(8)   | 118.3(2)   |
| C(44)-Re(1)-P(2)  | 90.69(8)   | C(12)-C(7)-P(1)   | 122.1(2)   |
| O(2)-Re(1)-P(2)   | 86.16(5)   | C(8)-C(7)-P(1)    | 119.29(19) |
| N(1)-Re(1)-P(2)   | 89.55(5)   | C(9)-C(8)-C(7)    | 120.3(3)   |
| C(43)-Re(1)-P(1)  | 92.67(8)   | C(9)-C(8)-H(8)    | 119.8      |
| C(44)-Re(1)-P(1)  | 87.88(8)   | C(7)-C(8)-H(8)    | 119.8      |
| O(2)-Re(1)-P(1)   | 88.79(5)   | C(10)-C(9)-C(8)   | 120.8(3)   |
| N(1)-Re(1)-P(1)   | 91.46(6)   | C(10)-C(9)-H(9)   | 119.6      |
| P(2)-Re(1)-P(1)   | 174.39(2)  | C(8)-C(9)-H(9)    | 119.6      |
| C(19)-P(1)-C(13)  | 103.43(11) | C(11)-C(10)-C(9)  | 119.5(3)   |
| C(19)-P(1)-C(7)   | 101.05(11) | C(11)-C(10)-H(10) | 120.3      |
| C(13)-P(1)-C(7)   | 105.87(11) | C(9)-C(10)-H(10)  | 120.3      |
| C(19)-P(1)-Re(1)  | 114.81(8)  | C(10)-C(11)-C(12) | 120.4(3)   |
| C(13)-P(1)-Re(1)  | 114.84(8)  | C(10)-C(11)-H(11) | 119.8      |
| C(7)-P(1)-Re(1)   | 115.23(8)  | C(12)-C(11)-H(11) | 119.8      |
| C(25)-P(2)-C(31)  | 105.64(11) | C(7)-C(12)-C(11)  | 120.7(3)   |
| C(25)-P(2)-C(37)  | 103.75(11) | C(7)-C(12)-H(12)  | 119.7      |

|                   |            |                   |            |
|-------------------|------------|-------------------|------------|
| C(11)-C(12)-H(12) | 119.7      | C(28)-C(27)-C(26) | 120.2(3)   |
| C(18)-C(13)-C(14) | 118.7(2)   | C(28)-C(27)-H(27) | 119.9      |
| C(18)-C(13)-P(1)  | 123.71(19) | C(26)-C(27)-H(27) | 119.9      |
| C(14)-C(13)-P(1)  | 117.60(19) | C(27)-C(28)-C(29) | 120.4(3)   |
| C(15)-C(14)-C(13) | 120.5(3)   | C(27)-C(28)-H(28) | 119.8      |
| C(15)-C(14)-H(14) | 119.7      | C(29)-C(28)-H(28) | 119.8      |
| C(13)-C(14)-H(14) | 119.7      | C(28)-C(29)-C(30) | 120.0(3)   |
| C(16)-C(15)-C(14) | 120.0(3)   | C(28)-C(29)-H(29) | 120        |
| C(16)-C(15)-H(15) | 120        | C(30)-C(29)-H(29) | 120        |
| C(14)-C(15)-H(15) | 120        | C(29)-C(30)-C(25) | 120.3(3)   |
| C(15)-C(16)-C(17) | 120.3(3)   | C(29)-C(30)-H(30) | 119.8      |
| C(15)-C(16)-H(16) | 119.9      | C(25)-C(30)-H(30) | 119.8      |
| C(17)-C(16)-H(16) | 119.9      | C(32)-C(31)-C(36) | 118.7(2)   |
| C(16)-C(17)-C(18) | 120.2(3)   | C(32)-C(31)-P(2)  | 124.03(19) |
| C(16)-C(17)-H(17) | 119.9      | C(36)-C(31)-P(2)  | 116.9(2)   |
| C(18)-C(17)-H(17) | 119.9      | C(33)-C(32)-C(31) | 120.5(2)   |
| C(13)-C(18)-C(17) | 120.3(3)   | C(33)-C(32)-H(32) | 119.7      |
| C(13)-C(18)-H(18) | 119.8      | C(31)-C(32)-H(32) | 119.7      |
| C(17)-C(18)-H(18) | 119.8      | C(34)-C(33)-C(32) | 120.4(3)   |
| C(24)-C(19)-C(20) | 118.8(2)   | C(34)-C(33)-H(33) | 119.8      |
| C(24)-C(19)-P(1)  | 122.29(19) | C(32)-C(33)-H(33) | 119.8      |
| C(20)-C(19)-P(1)  | 118.60(19) | C(33)-C(34)-C(35) | 119.8(2)   |
| C(21)-C(20)-C(19) | 120.3(3)   | C(33)-C(34)-H(34) | 120.1      |
| C(21)-C(20)-H(20) | 119.8      | C(35)-C(34)-H(34) | 120.1      |
| C(19)-C(20)-H(20) | 119.8      | C(36)-C(35)-C(34) | 120.0(3)   |
| C(22)-C(21)-C(20) | 120.4(3)   | C(36)-C(35)-H(35) | 120        |
| C(22)-C(21)-H(21) | 119.8      | C(34)-C(35)-H(35) | 120        |
| C(20)-C(21)-H(21) | 119.8      | C(35)-C(36)-C(31) | 120.5(3)   |
| C(21)-C(22)-C(23) | 119.8(3)   | C(35)-C(36)-H(36) | 119.8      |
| C(21)-C(22)-H(22) | 120.1      | C(31)-C(36)-H(36) | 119.8      |
| C(23)-C(22)-H(22) | 120.1      | C(42)-C(37)-C(38) | 119.0(2)   |
| C(22)-C(23)-C(24) | 120.4(3)   | C(42)-C(37)-P(2)  | 120.5(2)   |
| C(22)-C(23)-H(23) | 119.8      | C(38)-C(37)-P(2)  | 120.5(2)   |
| C(24)-C(23)-H(23) | 119.8      | C(39)-C(38)-C(37) | 120.3(3)   |
| C(23)-C(24)-C(19) | 120.2(2)   | C(39)-C(38)-H(38) | 119.9      |
| C(23)-C(24)-H(24) | 119.9      | C(37)-C(38)-H(38) | 119.9      |
| C(19)-C(24)-H(24) | 119.9      | C(40)-C(39)-C(38) | 120.4(3)   |
| C(26)-C(25)-C(30) | 118.8(2)   | C(40)-C(39)-H(39) | 119.8      |
| C(26)-C(25)-P(2)  | 120.49(18) | C(38)-C(39)-H(39) | 119.8      |
| C(30)-C(25)-P(2)  | 120.2(2)   | C(41)-C(40)-C(39) | 119.8(3)   |
| C(27)-C(26)-C(25) | 120.3(2)   | C(41)-C(40)-H(40) | 120.1      |
| C(27)-C(26)-H(26) | 119.8      | C(39)-C(40)-H(40) | 120.1      |
| C(25)-C(26)-H(26) | 119.8      | C(40)-C(41)-C(42) | 120.2(3)   |

|                   |            |                   |            |
|-------------------|------------|-------------------|------------|
| C(40)-C(41)-H(41) | 119.9      | Cl(1)-C(45)-H(45) | 108.7      |
| C(42)-C(41)-H(41) | 119.9      | Cl(2)-C(45)-H(45) | 108.7      |
| C(37)-C(42)-C(41) | 120.3(3)   | Cl(3)-C(45)-H(45) | 108.7      |
| C(37)-C(42)-H(42) | 119.8      | Cl(4)-C(46)-Cl(6) | 110.48(18) |
| C(41)-C(42)-H(42) | 119.8      | Cl(4)-C(46)-Cl(5) | 110.5(2)   |
| O(4)-C(43)-Re(1)  | 177.2(2)   | Cl(6)-C(46)-Cl(5) | 110.29(17) |
| O(5)-C(44)-Re(1)  | 179.0(2)   | Cl(4)-C(46)-H(46) | 108.5      |
| Cl(1)-C(45)-Cl(2) | 110.20(19) | Cl(6)-C(46)-H(46) | 108.5      |
| Cl(1)-C(45)-Cl(3) | 110.7(2)   | Cl(5)-C(46)-H(46) | 108.5      |
| Cl(2)-C(45)-Cl(3) | 109.79(19) |                   |            |

---

Table S12. Anisotropic displacement parameters ( $\text{\AA}^2 \times 10^3$ ) for **3**. The anisotropic displacement factor exponent takes the form:  $-2 \pi^2 [ h^2 a^{*2} U_{11} + \dots + 2 h k a^* b^* U_{12} ]$

|       | U11    | U22   | U33    | U23    | U13    | U12    |
|-------|--------|-------|--------|--------|--------|--------|
| Re(1) | 16(1)  | 16(1) | 16(1)  | -2(1)  | -1(1)  | -3(1)  |
| Cl(1) | 164(2) | 61(1) | 57(1)  | 12(1)  | -21(1) | -41(1) |
| Cl(2) | 63(1)  | 63(1) | 47(1)  | -10(1) | -8(1)  | -21(1) |
| Cl(3) | 47(1)  | 68(1) | 97(1)  | -13(1) | -1(1)  | -13(1) |
| Cl(4) | 131(1) | 44(1) | 127(1) | -35(1) | -94(1) | 27(1)  |
| Cl(5) | 41(1)  | 72(1) | 56(1)  | -24(1) | -3(1)  | 2(1)   |
| Cl(6) | 72(1)  | 51(1) | 50(1)  | -17(1) | -7(1)  | -18(1) |
| P(1)  | 17(1)  | 18(1) | 17(1)  | -2(1)  | -2(1)  | -5(1)  |
| P(2)  | 17(1)  | 18(1) | 19(1)  | -3(1)  | -1(1)  | -4(1)  |
| O(2)  | 22(1)  | 23(1) | 19(1)  | -3(1)  | -3(1)  | -7(1)  |
| O(3)  | 41(1)  | 39(1) | 20(1)  | 6(1)   | -7(1)  | -19(1) |
| O(4)  | 43(1)  | 35(1) | 26(1)  | 6(1)   | -9(1)  | -2(1)  |
| O(5)  | 26(1)  | 48(1) | 48(1)  | -11(1) | 5(1)   | -18(1) |
| N(1)  | 20(1)  | 20(1) | 19(1)  | -5(1)  | -2(1)  | -6(1)  |
| C(1)  | 26(1)  | 23(1) | 19(1)  | -5(1)  | -2(1)  | -7(1)  |
| C(2)  | 25(1)  | 25(1) | 20(1)  | -5(1)  | -3(1)  | -10(1) |
| C(3)  | 40(2)  | 44(2) | 25(1)  | -3(1)  | 2(1)   | -26(2) |
| C(4)  | 31(2)  | 54(2) | 38(2)  | -12(1) | 4(1)   | -28(2) |
| C(5)  | 24(1)  | 44(2) | 34(1)  | -12(1) | -6(1)  | -14(1) |
| C(6)  | 23(1)  | 27(1) | 25(1)  | -6(1)  | -4(1)  | -3(1)  |
| C(7)  | 21(1)  | 22(1) | 21(1)  | -4(1)  | 1(1)   | -6(1)  |
| C(8)  | 24(1)  | 27(1) | 24(1)  | -5(1)  | -4(1)  | -8(1)  |
| C(9)  | 30(2)  | 46(2) | 31(1)  | -6(1)  | -1(1)  | -20(1) |
| C(10) | 41(2)  | 40(2) | 48(2)  | 3(1)   | 2(1)   | -25(2) |
| C(11) | 44(2)  | 38(2) | 70(2)  | 25(2)  | -15(2) | -19(2) |
| C(12) | 27(2)  | 36(2) | 53(2)  | 13(1)  | -11(1) | -13(1) |
| C(13) | 18(1)  | 24(1) | 18(1)  | -4(1)  | -1(1)  | -4(1)  |
| C(14) | 32(2)  | 31(1) | 22(1)  | -5(1)  | 1(1)   | -14(1) |
| C(15) | 41(2)  | 39(2) | 23(1)  | 1(1)   | 3(1)   | -17(1) |
| C(16) | 43(2)  | 50(2) | 17(1)  | -5(1)  | 1(1)   | -12(2) |
| C(17) | 45(2)  | 48(2) | 25(1)  | -15(1) | -1(1)  | -19(2) |
| C(18) | 33(2)  | 32(1) | 23(1)  | -8(1)  | 0(1)   | -13(1) |
| C(19) | 17(1)  | 18(1) | 24(1)  | -2(1)  | -3(1)  | -5(1)  |
| C(20) | 23(1)  | 27(1) | 27(1)  | -5(1)  | -4(1)  | -2(1)  |
| C(21) | 27(1)  | 29(1) | 32(1)  | -2(1)  | -12(1) | -5(1)  |
| C(22) | 20(1)  | 22(1) | 41(2)  | 3(1)   | -8(1)  | -5(1)  |
| C(23) | 20(1)  | 21(1) | 41(2)  | -5(1)  | 2(1)   | -4(1)  |



|       |       |       |       |        |        |        |
|-------|-------|-------|-------|--------|--------|--------|
| C(24) | 23(1) | 20(1) | 27(1) | -4(1)  | -1(1)  | -8(1)  |
| C(25) | 21(1) | 19(1) | 22(1) | -6(1)  | 0(1)   | -5(1)  |
| C(26) | 22(1) | 25(1) | 27(1) | -3(1)  | -1(1)  | -6(1)  |
| C(27) | 20(1) | 37(2) | 40(2) | -7(1)  | -1(1)  | -7(1)  |
| C(28) | 29(2) | 42(2) | 36(2) | -10(1) | 11(1)  | -15(1) |
| C(29) | 38(2) | 36(2) | 22(1) | -6(1)  | 4(1)   | -16(1) |
| C(30) | 26(1) | 26(1) | 24(1) | -6(1)  | -1(1)  | -8(1)  |
| C(31) | 24(1) | 17(1) | 21(1) | -3(1)  | -5(1)  | -6(1)  |
| C(32) | 27(1) | 23(1) | 27(1) | -5(1)  | -2(1)  | -4(1)  |
| C(33) | 33(2) | 21(1) | 41(2) | -3(1)  | -10(1) | 2(1)   |
| C(34) | 46(2) | 22(1) | 32(1) | 3(1)   | -13(1) | -12(1) |
| C(35) | 41(2) | 29(2) | 29(1) | 1(1)   | -3(1)  | -17(1) |
| C(36) | 28(1) | 27(1) | 26(1) | -4(1)  | -1(1)  | -10(1) |
| C(37) | 19(1) | 26(1) | 18(1) | -3(1)  | -1(1)  | -8(1)  |
| C(38) | 23(1) | 30(1) | 30(1) | -11(1) | -2(1)  | -4(1)  |
| C(39) | 33(2) | 35(2) | 29(1) | -14(1) | 2(1)   | -13(1) |
| C(40) | 31(2) | 41(2) | 19(1) | -4(1)  | -2(1)  | -21(1) |
| C(41) | 27(1) | 35(2) | 32(1) | 1(1)   | -10(1) | -12(1) |
| C(42) | 25(1) | 24(1) | 29(1) | -1(1)  | -6(1)  | -8(1)  |
| C(43) | 23(1) | 22(1) | 25(1) | -2(1)  | -1(1)  | -4(1)  |
| C(44) | 22(1) | 22(1) | 25(1) | -5(1)  | 0(1)   | -5(1)  |
| C(45) | 53(2) | 57(2) | 38(2) | -2(2)  | -16(2) | -27(2) |
| C(46) | 40(2) | 45(2) | 27(1) | -6(1)  | 0(1)   | -4(2)  |

---

Table S13. Hydrogen coordinates ( $\times 10^4$ ) and isotropic displacement parameters ( $\text{\AA}^2 \times 10^3$ ) for **3**.

|       | x     | y     | z     | U(eq) |
|-------|-------|-------|-------|-------|
| H(3)  | -186  | 1795  | 8563  | 41    |
| H(4)  | -1999 | 2299  | 7733  | 45    |
| H(5)  | -1925 | 3311  | 6358  | 39    |
| H(6)  | -62   | 3771  | 5832  | 31    |
| H(8)  | 1336  | 1824  | 5544  | 29    |
| H(9)  | 205   | 683   | 6098  | 40    |
| H(10) | 1133  | -734  | 7069  | 51    |
| H(11) | 3210  | -1008 | 7487  | 64    |
| H(12) | 4340  | 150   | 6972  | 48    |
| H(14) | 4642  | 3440  | 4543  | 33    |
| H(15) | 4895  | 3763  | 3002  | 42    |
| H(16) | 4288  | 2832  | 2187  | 45    |
| H(17) | 3487  | 1545  | 2901  | 44    |
| H(18) | 3303  | 1171  | 4444  | 34    |
| H(20) | 5073  | 1779  | 7409  | 32    |
| H(21) | 7061  | 796   | 7909  | 36    |
| H(22) | 8601  | -103  | 6972  | 34    |
| H(23) | 8164  | -9    | 5521  | 34    |
| H(24) | 6156  | 935   | 5020  | 28    |
| H(26) | -906  | 5245  | 7048  | 30    |
| H(27) | -2669 | 4973  | 7995  | 39    |
| H(28) | -2423 | 4346  | 9486  | 42    |
| H(29) | -414  | 3985  | 10046 | 38    |
| H(30) | 1351  | 4296  | 9118  | 30    |
| H(32) | -424  | 6688  | 7164  | 32    |
| H(33) | -802  | 8254  | 6338  | 40    |
| H(34) | 749   | 8645  | 5250  | 40    |
| H(35) | 2653  | 7442  | 4940  | 39    |
| H(36) | 3010  | 5862  | 5732  | 32    |
| H(38) | 1918  | 6526  | 8017  | 33    |
| H(39) | 3364  | 6797  | 8844  | 36    |
| H(40) | 5241  | 5566  | 9247  | 34    |
| H(41) | 5621  | 4032  | 8883  | 37    |
| H(42) | 4182  | 3750  | 8050  | 31    |
| H(45) | 3737  | 1647  | 9636  | 56    |
| H(46) | 814   | 1669  | 10076 | 47    |

Table S14. Torsion angles [°] for **3**.

|                        |             |                        |            |
|------------------------|-------------|------------------------|------------|
| C(43)-Re(1)-P(1)-C(19) | 130.98(11)  | C(44)-Re(1)-N(1)-C(2)  | 6.2(12)    |
| C(44)-Re(1)-P(1)-C(19) | 42.13(11)   | O(2)-Re(1)-N(1)-C(2)   | -0.66(17)  |
| O(2)-Re(1)-P(1)-C(19)  | -59.09(9)   | P(2)-Re(1)-N(1)-C(2)   | -86.80(17) |
| N(1)-Re(1)-P(1)-C(19)  | -133.38(10) | P(1)-Re(1)-N(1)-C(2)   | 87.68(17)  |
| P(2)-Re(1)-P(1)-C(19)  | -33.1(2)    | Re(1)-O(2)-C(1)-O(3)   | -179.0(2)  |
| C(43)-Re(1)-P(1)-C(13) | 11.25(12)   | Re(1)-O(2)-C(1)-C(2)   | -0.2(3)    |
| C(44)-Re(1)-P(1)-C(13) | -77.61(12)  | C(6)-N(1)-C(2)-C(3)    | 1.0(4)     |
| O(2)-Re(1)-P(1)-C(13)  | -178.83(10) | Re(1)-N(1)-C(2)-C(3)   | 179.7(2)   |
| N(1)-Re(1)-P(1)-C(13)  | 106.88(10)  | C(6)-N(1)-C(2)-C(1)    | -177.9(2)  |
| P(2)-Re(1)-P(1)-C(13)  | -152.9(2)   | Re(1)-N(1)-C(2)-C(1)   | 0.8(3)     |
| C(43)-Re(1)-P(1)-C(7)  | -112.20(12) | O(3)-C(1)-C(2)-N(1)    | 178.5(2)   |
| C(44)-Re(1)-P(1)-C(7)  | 158.95(12)  | O(2)-C(1)-C(2)-N(1)    | -0.4(3)    |
| O(2)-Re(1)-P(1)-C(7)   | 57.73(10)   | O(3)-C(1)-C(2)-C(3)    | -0.4(4)    |
| N(1)-Re(1)-P(1)-C(7)   | -16.56(11)  | O(2)-C(1)-C(2)-C(3)    | -179.3(3)  |
| P(2)-Re(1)-P(1)-C(7)   | 83.7(2)     | N(1)-C(2)-C(3)-C(4)    | -1.9(4)    |
| C(43)-Re(1)-P(2)-C(25) | 110.68(12)  | C(1)-C(2)-C(3)-C(4)    | 177.0(3)   |
| C(44)-Re(1)-P(2)-C(25) | -160.33(12) | C(2)-C(3)-C(4)-C(5)    | 1.0(5)     |
| O(2)-Re(1)-P(2)-C(25)  | -59.19(10)  | C(3)-C(4)-C(5)-C(6)    | 0.6(5)     |
| N(1)-Re(1)-P(2)-C(25)  | 15.14(11)   | C(2)-N(1)-C(6)-C(5)    | 0.7(4)     |
| P(1)-Re(1)-P(2)-C(25)  | -85.2(2)    | Re(1)-N(1)-C(6)-C(5)   | -177.8(2)  |
| C(43)-Re(1)-P(2)-C(31) | -12.66(12)  | C(4)-C(5)-C(6)-N(1)    | -1.5(4)    |
| C(44)-Re(1)-P(2)-C(31) | 76.33(12)   | C(19)-P(1)-C(7)-C(12)  | 17.0(3)    |
| O(2)-Re(1)-P(2)-C(31)  | 177.47(10)  | C(13)-P(1)-C(7)-C(12)  | 124.6(2)   |
| N(1)-Re(1)-P(2)-C(31)  | -108.20(11) | Re(1)-P(1)-C(7)-C(12)  | -107.3(2)  |
| P(1)-Re(1)-P(2)-C(31)  | 151.4(2)    | C(19)-P(1)-C(7)-C(8)   | -169.1(2)  |
| C(43)-Re(1)-P(2)-C(37) | -130.07(11) | C(13)-P(1)-C(7)-C(8)   | -61.5(2)   |
| C(44)-Re(1)-P(2)-C(37) | -41.09(11)  | Re(1)-P(1)-C(7)-C(8)   | 66.5(2)    |
| O(2)-Re(1)-P(2)-C(37)  | 60.06(9)    | C(12)-C(7)-C(8)-C(9)   | 0.7(4)     |
| N(1)-Re(1)-P(2)-C(37)  | 134.38(10)  | P(1)-C(7)-C(8)-C(9)    | -173.4(2)  |
| P(1)-Re(1)-P(2)-C(37)  | 34.0(2)     | C(7)-C(8)-C(9)-C(10)   | -0.9(4)    |
| C(43)-Re(1)-O(2)-C(1)  | 7.0(6)      | C(8)-C(9)-C(10)-C(11)  | 0.0(5)     |
| C(44)-Re(1)-O(2)-C(1)  | -179.01(18) | C(9)-C(10)-C(11)-C(12) | 1.0(6)     |
| N(1)-Re(1)-O(2)-C(1)   | 0.44(17)    | C(8)-C(7)-C(12)-C(11)  | 0.3(5)     |
| P(2)-Re(1)-O(2)-C(1)   | 91.05(17)   | P(1)-C(7)-C(12)-C(11)  | 174.2(3)   |
| P(1)-Re(1)-O(2)-C(1)   | -91.41(17)  | C(10)-C(11)-C(12)-C(7) | -1.2(6)    |
| C(43)-Re(1)-N(1)-C(6)  | -0.9(2)     | C(19)-P(1)-C(13)-C(18) | 100.9(2)   |
| C(44)-Re(1)-N(1)-C(6)  | -175.2(11)  | C(7)-P(1)-C(13)-C(18)  | -5.0(3)    |
| O(2)-Re(1)-N(1)-C(6)   | 177.9(2)    | Re(1)-P(1)-C(13)-C(18) | -133.3(2)  |
| P(2)-Re(1)-N(1)-C(6)   | 91.8(2)     | C(19)-P(1)-C(13)-C(14) | -79.4(2)   |
| P(1)-Re(1)-N(1)-C(6)   | -93.7(2)    | C(7)-P(1)-C(13)-C(14)  | 174.7(2)   |
| C(43)-Re(1)-N(1)-C(2)  | -179.50(18) | Re(1)-P(1)-C(13)-C(14) | 46.4(2)    |

|                         |             |                         |            |
|-------------------------|-------------|-------------------------|------------|
| C(18)-C(13)-C(14)-C(15) | 0.5(4)      | C(37)-P(2)-C(31)-C(32)  | -96.9(2)   |
| P(1)-C(13)-C(14)-C(15)  | -179.2(2)   | Re(1)-P(2)-C(31)-C(32)  | 137.7(2)   |
| C(13)-C(14)-C(15)-C(16) | 1.0(5)      | C(25)-P(2)-C(31)-C(36)  | -175.7(2)  |
| C(14)-C(15)-C(16)-C(17) | -1.1(5)     | C(37)-P(2)-C(31)-C(36)  | 76.8(2)    |
| C(15)-C(16)-C(17)-C(18) | -0.2(5)     | Re(1)-P(2)-C(31)-C(36)  | -48.6(2)   |
| C(14)-C(13)-C(18)-C(17) | -1.9(4)     | C(36)-C(31)-C(32)-C(33) | -1.3(4)    |
| P(1)-C(13)-C(18)-C(17)  | 177.8(2)    | P(2)-C(31)-C(32)-C(33)  | 172.3(2)   |
| C(16)-C(17)-C(18)-C(13) | 1.7(5)      | C(31)-C(32)-C(33)-C(34) | -0.7(4)    |
| C(13)-P(1)-C(19)-C(24)  | -23.3(2)    | C(32)-C(33)-C(34)-C(35) | 1.6(5)     |
| C(7)-P(1)-C(19)-C(24)   | 86.1(2)     | C(33)-C(34)-C(35)-C(36) | -0.6(4)    |
| Re(1)-P(1)-C(19)-C(24)  | -149.21(17) | C(34)-C(35)-C(36)-C(31) | -1.5(4)    |
| C(13)-P(1)-C(19)-C(20)  | 162.9(2)    | C(32)-C(31)-C(36)-C(35) | 2.4(4)     |
| C(7)-P(1)-C(19)-C(20)   | -87.6(2)    | P(2)-C(31)-C(36)-C(35)  | -171.7(2)  |
| Re(1)-P(1)-C(19)-C(20)  | 37.0(2)     | C(25)-P(2)-C(37)-C(42)  | 106.8(2)   |
| C(24)-C(19)-C(20)-C(21) | -2.0(4)     | C(31)-P(2)-C(37)-C(42)  | -144.2(2)  |
| P(1)-C(19)-C(20)-C(21)  | 171.9(2)    | Re(1)-P(2)-C(37)-C(42)  | -17.5(2)   |
| C(19)-C(20)-C(21)-C(22) | 1.3(4)      | C(25)-P(2)-C(37)-C(38)  | -75.3(2)   |
| C(20)-C(21)-C(22)-C(23) | 0.4(4)      | C(31)-P(2)-C(37)-C(38)  | 33.7(2)    |
| C(21)-C(22)-C(23)-C(24) | -1.4(4)     | Re(1)-P(2)-C(37)-C(38)  | 160.40(17) |
| C(22)-C(23)-C(24)-C(19) | 0.7(4)      | C(42)-C(37)-C(38)-C(39) | 1.2(4)     |
| C(20)-C(19)-C(24)-C(23) | 1.0(4)      | P(2)-C(37)-C(38)-C(39)  | -176.8(2)  |
| P(1)-C(19)-C(24)-C(23)  | -172.70(19) | C(37)-C(38)-C(39)-C(40) | 0.2(4)     |
| C(31)-P(2)-C(25)-C(26)  | 52.6(2)     | C(38)-C(39)-C(40)-C(41) | -1.6(4)    |
| C(37)-P(2)-C(25)-C(26)  | 157.3(2)    | C(39)-C(40)-C(41)-C(42) | 1.7(4)     |
| Re(1)-P(2)-C(25)-C(26)  | -76.9(2)    | C(38)-C(37)-C(42)-C(41) | -1.1(4)    |
| C(31)-P(2)-C(25)-C(30)  | -135.6(2)   | P(2)-C(37)-C(42)-C(41)  | 176.9(2)   |
| C(37)-P(2)-C(25)-C(30)  | -30.9(2)    | C(40)-C(41)-C(42)-C(37) | -0.3(4)    |
| Re(1)-P(2)-C(25)-C(30)  | 94.9(2)     | C(44)-Re(1)-C(43)-O(4)  | 178(100)   |
| C(30)-C(25)-C(26)-C(27) | 1.6(4)      | O(2)-Re(1)-C(43)-O(4)   | -8(5)      |
| P(2)-C(25)-C(26)-C(27)  | 173.5(2)    | N(1)-Re(1)-C(43)-O(4)   | -1(5)      |
| C(25)-C(26)-C(27)-C(28) | -1.3(4)     | P(2)-Re(1)-C(43)-O(4)   | -91(5)     |
| C(26)-C(27)-C(28)-C(29) | 0.0(5)      | P(1)-Re(1)-C(43)-O(4)   | 90(5)      |
| C(27)-C(28)-C(29)-C(30) | 1.1(5)      | C(43)-Re(1)-C(44)-O(5)  | -48(14)    |
| C(28)-C(29)-C(30)-C(25) | -0.8(4)     | O(2)-Re(1)-C(44)-O(5)   | 133(14)    |
| C(26)-C(25)-C(30)-C(29) | -0.5(4)     | N(1)-Re(1)-C(44)-O(5)   | 127(14)    |
| P(2)-C(25)-C(30)-C(29)  | -172.5(2)   | P(2)-Re(1)-C(44)-O(5)   | -141(14)   |
| C(25)-P(2)-C(31)-C(32)  | 10.6(3)     | P(1)-Re(1)-C(44)-O(5)   | 45(14)     |

---

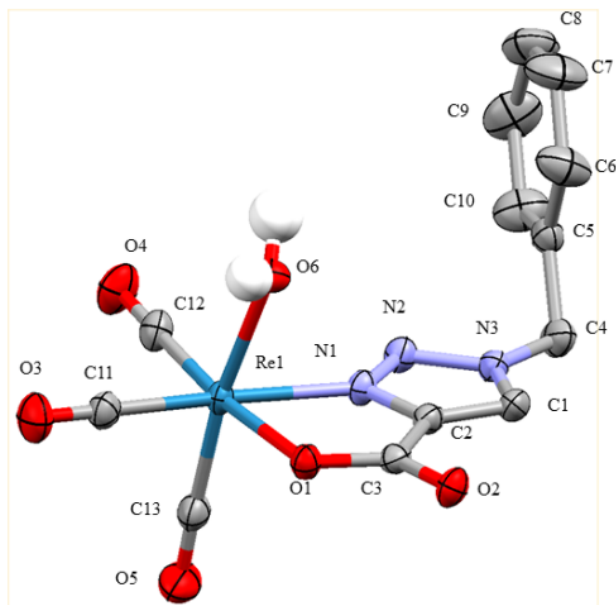

Table S15. Crystal data and structure refinement for **5**.

|                                   |                                                                  |                  |
|-----------------------------------|------------------------------------------------------------------|------------------|
| Empirical formula                 | C <sub>16</sub> H <sub>16</sub> N <sub>3</sub> O <sub>7</sub> Re |                  |
| Formula weight                    | 548.52                                                           |                  |
| Temperature                       | 173(2) K                                                         |                  |
| Wavelength                        | 0.71073 Å                                                        |                  |
| Crystal system, space group       | Triclinic, <i>P</i> -1                                           |                  |
| Unit cell dimensions              | a = 8.6015(9) Å                                                  | α = 88.9500(10)° |
|                                   | b = 10.2481(11) Å                                                | β = 74.7110(10)° |
|                                   | c = 11.3012(12) Å                                                | γ = 86.0810(10)° |
| Volume                            | 958.69(18) Å <sup>3</sup>                                        |                  |
| Z, Calculated density             | 2, 1.900 Mg/m <sup>3</sup>                                       |                  |
| Absorption coefficient            | 6.380 mm <sup>-1</sup>                                           |                  |
| F(000)                            | 528                                                              |                  |
| Crystal size                      | 0.35 x 0.25 x 0.15 mm                                            |                  |
| Theta range for data collection   | 1.87 to 27.56°                                                   |                  |
| Limiting indices                  | -11 ≤ h ≤ 11, -13 ≤ k ≤ 13, -14 ≤ l ≤ 14                         |                  |
| Reflections collected / unique    | 11290 / 4355 [R(int) = 0.0216]                                   |                  |
| Completeness to theta = 27.56     | 98.3 %                                                           |                  |
| Absorption correction             | Semi-empirical from equivalents                                  |                  |
| Max. and min. transmission        | 0.45 and 0.29                                                    |                  |
| Refinement method                 | Full-matrix least-squares on F <sup>2</sup>                      |                  |
| Data / restraints / parameters    | 4355 / 0 / 248                                                   |                  |
| Goodness-of-fit on F <sup>2</sup> | 1.045                                                            |                  |
| Final R indices [I > 2σ(I)]       | R <sub>1</sub> = 0.0166, wR <sub>2</sub> = 0.0398                |                  |
| R indices (all data)              | R <sub>1</sub> = 0.0181, wR <sub>2</sub> = 0.0404                |                  |
| Largest diff. peak and hole       | 0.534 and -0.553 e. Å <sup>-3</sup>                              |                  |

Table S16. Atomic coordinates ( $\times 10^4$ ) and equivalent isotropic displacement parameters ( $\text{\AA}^2 \times 10^3$ ) for **5**.  $U(\text{eq})$  is defined as one third of the trace of the orthogonalized  $U^{ij}$  tensor.

|       | x        | y        | z       | U(eq) |
|-------|----------|----------|---------|-------|
| Re(1) | 842(1)   | 704(1)   | 2089(1) | 20(1) |
| O(1)  | 1242(2)  | -483(2)  | 3595(2) | 24(1) |
| O(2)  | 2658(2)  | -761(2)  | 4988(2) | 28(1) |
| O(3)  | -2315(2) | -499(2)  | 2045(2) | 41(1) |
| O(4)  | 391(3)   | 2665(2)  | 117(2)  | 42(1) |
| O(5)  | 2725(3)  | -1213(2) | 103(2)  | 47(1) |
| O(6)  | -239(2)  | 1967(2)  | 3653(2) | 29(1) |
| O(7)  | -1063(3) | 4520(2)  | 3864(2) | 57(1) |
| N(1)  | 2980(2)  | 1396(2)  | 2446(2) | 22(1) |
| N(2)  | 3981(3)  | 2294(2)  | 1953(2) | 25(1) |
| N(3)  | 5046(2)  | 2282(2)  | 2638(2) | 24(1) |
| C(1)  | 4732(3)  | 1397(2)  | 3553(2) | 25(1) |
| C(2)  | 3386(3)  | 829(2)   | 3425(2) | 22(1) |
| C(3)  | 2367(3)  | -211(2)  | 4072(2) | 22(1) |
| C(4)  | 6374(3)  | 3163(3)  | 2307(3) | 33(1) |
| C(5)  | 5767(3)  | 4577(3)  | 2304(3) | 27(1) |
| C(6)  | 4789(4)  | 5160(3)  | 3360(3) | 46(1) |
| C(7)  | 4261(5)  | 6475(3)  | 3353(3) | 58(1) |
| C(8)  | 4687(5)  | 7193(3)  | 2300(4) | 53(1) |
| C(9)  | 5626(4)  | 6626(3)  | 1243(3) | 53(1) |
| C(10) | 6159(4)  | 5304(3)  | 1254(3) | 45(1) |
| C(11) | -1133(3) | -50(3)   | 2056(2) | 28(1) |
| C(12) | 560(3)   | 1916(3)  | 859(3)  | 29(1) |
| C(13) | 1996(3)  | -480(3)  | 843(3)  | 30(1) |
| C(14) | -1250(6) | 6808(3)  | 3748(5) | 79(1) |
| C(15) | -532(4)  | 5488(3)  | 3317(3) | 44(1) |
| C(16) | 793(5)   | 5373(4)  | 2169(4) | 73(1) |

Table S17. Bond lengths [ $\text{\AA}$ ] and angles [ $^\circ$ ] for **5**.

|                   |            |                  |          |
|-------------------|------------|------------------|----------|
| Re(1)-C(13)       | 1.898(3)   | C(4)-C(5)        | 1.507(4) |
| Re(1)-C(12)       | 1.899(3)   | C(4)-H(4A)       | 0.9900   |
| Re(1)-C(11)       | 1.923(3)   | C(4)-H(4B)       | 0.9900   |
| Re(1)-N(1)        | 2.152(2)   | C(5)-C(10)       | 1.366(4) |
| Re(1)-O(1)        | 2.1612(17) | C(5)-C(6)        | 1.385(4) |
| Re(1)-O(6)        | 2.1719(18) | C(6)-C(7)        | 1.393(4) |
| O(1)-C(3)         | 1.274(3)   | C(6)-H(6)        | 0.9500   |
| O(2)-C(3)         | 1.244(3)   | C(7)-C(8)        | 1.366(5) |
| O(3)-C(11)        | 1.147(3)   | C(7)-H(7)        | 0.9500   |
| O(4)-C(12)        | 1.157(3)   | C(8)-C(9)        | 1.367(5) |
| O(5)-C(13)        | 1.157(3)   | C(8)-H(8)        | 0.9500   |
| O(6)-H(2O)        | 0.8588     | C(9)-C(10)       | 1.402(5) |
| O(6)-H(1O)        | 0.8985     | C(9)-H(9)        | 0.9500   |
| O(7)-C(15)        | 1.210(4)   | C(10)-H(10)      | 0.9500   |
| N(1)-N(2)         | 1.316(3)   | C(14)-C(15)      | 1.483(5) |
| N(1)-C(2)         | 1.355(3)   | C(14)-H(14A)     | 0.9800   |
| N(2)-N(3)         | 1.345(3)   | C(14)-H(14B)     | 0.9800   |
| N(3)-C(1)         | 1.348(3)   | C(14)-H(14C)     | 0.9800   |
| N(3)-C(4)         | 1.471(3)   | C(15)-C(16)      | 1.484(5) |
| C(1)-C(2)         | 1.372(3)   | C(16)-H(16A)     | 0.9800   |
| C(1)-H(1)         | 0.9500     | C(16)-H(16B)     | 0.9800   |
| C(2)-C(3)         | 1.483(3)   | C(16)-H(16C)     | 0.9800   |
| C(13)-Re(1)-C(12) | 89.38(12)  | N(2)-N(3)-C(4)   | 119.0(2) |
| C(13)-Re(1)-C(11) | 89.48(11)  | C(1)-N(3)-C(4)   | 128.7(2) |
| C(12)-Re(1)-C(11) | 89.76(11)  | N(3)-C(1)-C(2)   | 104.4(2) |
| C(13)-Re(1)-N(1)  | 94.38(10)  | N(3)-C(1)-H(1)   | 127.8    |
| C(12)-Re(1)-N(1)  | 99.73(9)   | C(2)-C(1)-H(1)   | 127.8    |
| C(11)-Re(1)-N(1)  | 169.77(9)  | N(1)-C(2)-C(1)   | 107.4(2) |
| C(13)-Re(1)-O(1)  | 95.29(9)   | N(1)-C(2)-C(3)   | 117.0(2) |
| C(12)-Re(1)-O(1)  | 173.25(9)  | C(1)-C(2)-C(3)   | 135.6(2) |
| C(11)-Re(1)-O(1)  | 95.15(9)   | O(2)-C(3)-O(1)   | 125.0(2) |
| N(1)-Re(1)-O(1)   | 75.09(7)   | O(2)-C(3)-C(2)   | 120.4(2) |
| C(13)-Re(1)-O(6)  | 172.08(9)  | O(1)-C(3)-C(2)   | 114.5(2) |
| C(12)-Re(1)-O(6)  | 96.82(10)  | N(3)-C(4)-C(5)   | 112.1(2) |
| C(11)-Re(1)-O(6)  | 95.44(9)   | N(3)-C(4)-H(4A)  | 109.2    |
| N(1)-Re(1)-O(6)   | 79.76(7)   | C(5)-C(4)-H(4A)  | 109.2    |
| O(1)-Re(1)-O(6)   | 78.13(7)   | N(3)-C(4)-H(4B)  | 109.2    |
| C(3)-O(1)-Re(1)   | 118.59(15) | C(5)-C(4)-H(4B)  | 109.2    |
| Re(1)-O(6)-H(2O)  | 110.5      | H(4A)-C(4)-H(4B) | 107.9    |
| Re(1)-O(6)-H(1O)  | 129.2      | C(10)-C(5)-C(6)  | 118.8(3) |
| H(2O)-O(6)-H(1O)  | 110.8      | C(10)-C(5)-C(4)  | 120.5(3) |
| N(2)-N(1)-C(2)    | 110.9(2)   | C(6)-C(5)-C(4)   | 120.7(3) |
| N(2)-N(1)-Re(1)   | 134.59(16) | C(5)-C(6)-C(7)   | 120.2(3) |
| C(2)-N(1)-Re(1)   | 114.41(16) | C(5)-C(6)-H(6)   | 119.9    |
| N(1)-N(2)-N(3)    | 105.0(2)   | C(7)-C(6)-H(6)   | 119.9    |
| N(2)-N(3)-C(1)    | 112.3(2)   | C(8)-C(7)-C(6)   | 120.2(3) |

|                    |          |                     |          |
|--------------------|----------|---------------------|----------|
| C(8)-C(7)-H(7)     | 119.9    | C(15)-C(14)-H(14B)  | 109.5    |
| C(6)-C(7)-H(7)     | 119.9    | H(14A)-C(14)-H(14B) | 109.5    |
| C(7)-C(8)-C(9)     | 120.4(3) | C(15)-C(14)-H(14C)  | 109.5    |
| C(7)-C(8)-H(8)     | 119.8    | H(14A)-C(14)-H(14C) | 109.5    |
| C(9)-C(8)-H(8)     | 119.8    | H(14B)-C(14)-H(14C) | 109.5    |
| C(8)-C(9)-C(10)    | 119.3(3) | O(7)-C(15)-C(14)    | 120.5(4) |
| C(8)-C(9)-H(9)     | 120.4    | O(7)-C(15)-C(16)    | 120.6(3) |
| C(10)-C(9)-H(9)    | 120.4    | C(14)-C(15)-C(16)   | 118.8(3) |
| C(5)-C(10)-C(9)    | 121.1(3) | C(15)-C(16)-H(16A)  | 109.5    |
| C(5)-C(10)-H(10)   | 119.4    | C(15)-C(16)-H(16B)  | 109.5    |
| C(9)-C(10)-H(10)   | 119.4    | H(16A)-C(16)-H(16B) | 109.5    |
| O(3)-C(11)-Re(1)   | 179.5(3) | C(15)-C(16)-H(16C)  | 109.5    |
| O(4)-C(12)-Re(1)   | 179.3(3) | H(16A)-C(16)-H(16C) | 109.5    |
| O(5)-C(13)-Re(1)   | 178.2(2) | H(16B)-C(16)-H(16C) | 109.5    |
| C(15)-C(14)-H(14A) | 109.5    |                     |          |

---



Table S18. Anisotropic displacement parameters ( $\text{\AA}^2 \times 10^3$ ) for **5**. The anisotropic displacement factor exponent takes the form:  $-2 \pi^2 [ h^2 a^{*2} U11 + \dots + 2 h k a^* b^* U12 ]$

|       | U11   | U22   | U33    | U23    | U13    | U12    |
|-------|-------|-------|--------|--------|--------|--------|
| Re(1) | 20(1) | 24(1) | 20(1)  | 2(1)   | -8(1)  | -2(1)  |
| O(1)  | 26(1) | 24(1) | 25(1)  | 4(1)   | -11(1) | -4(1)  |
| O(2)  | 27(1) | 33(1) | 25(1)  | 8(1)   | -12(1) | -1(1)  |
| O(3)  | 32(1) | 48(1) | 48(1)  | 3(1)   | -16(1) | -14(1) |
| O(4)  | 44(1) | 48(1) | 38(1)  | 20(1)  | -18(1) | -4(1)  |
| O(5)  | 47(1) | 55(1) | 38(1)  | -16(1) | -16(1) | 15(1)  |
| O(6)  | 32(1) | 25(1) | 26(1)  | 0(1)   | -1(1)  | -1(1)  |
| O(7)  | 70(2) | 26(1) | 63(2)  | 3(1)   | 2(1)   | -6(1)  |
| N(1)  | 23(1) | 25(1) | 21(1)  | 4(1)   | -8(1)  | -3(1)  |
| N(2)  | 23(1) | 27(1) | 27(1)  | 3(1)   | -9(1)  | -3(1)  |
| N(3)  | 21(1) | 22(1) | 33(1)  | 0(1)   | -11(1) | -1(1)  |
| C(1)  | 26(1) | 23(1) | 29(1)  | 0(1)   | -13(1) | 2(1)   |
| C(2)  | 24(1) | 22(1) | 22(1)  | -1(1)  | -8(1)  | 3(1)   |
| C(3)  | 23(1) | 22(1) | 22(1)  | -1(1)  | -6(1)  | 3(1)   |
| C(4)  | 22(1) | 29(1) | 48(2)  | 0(1)   | -10(1) | -4(1)  |
| C(5)  | 26(1) | 27(1) | 32(1)  | 0(1)   | -11(1) | -5(1)  |
| C(6)  | 74(2) | 31(2) | 28(2)  | 0(1)   | -7(2)  | -2(2)  |
| C(7)  | 85(3) | 37(2) | 44(2)  | -12(2) | -5(2)  | 8(2)   |
| C(8)  | 63(2) | 26(2) | 69(3)  | 5(2)   | -16(2) | 1(2)   |
| C(9)  | 57(2) | 46(2) | 49(2)  | 23(2)  | -4(2)  | -5(2)  |
| C(10) | 42(2) | 44(2) | 37(2)  | 6(1)   | 7(1)   | 2(1)   |
| C(11) | 29(1) | 30(1) | 26(1)  | 2(1)   | -12(1) | -1(1)  |
| C(12) | 24(1) | 37(1) | 27(1)  | 2(1)   | -9(1)  | -3(1)  |
| C(13) | 28(1) | 36(1) | 29(2)  | 0(1)   | -13(1) | 1(1)   |
| C(14) | 90(3) | 26(2) | 125(4) | 1(2)   | -35(3) | -7(2)  |
| C(15) | 52(2) | 33(2) | 53(2)  | 7(1)   | -24(2) | -9(1)  |
| C(16) | 81(3) | 70(3) | 66(3)  | 21(2)  | -13(2) | -19(2) |

Table S19. Hydrogen coordinates ( $\times 10^4$ ) and isotropic displacement parameters ( $\text{\AA}^2 \times 10^3$ ) for **5**.

|        | x     | y    | z    | U(eq)  |
|--------|-------|------|------|--------|
| H(1)   | 5311  | 1209 | 4152 | 30     |
| H(4A)  | 7071  | 2926 | 1482 | 39     |
| H(4B)  | 7041  | 3045 | 2899 | 39     |
| H(6)   | 4479  | 4663 | 4092 | 55     |
| H(7)   | 3601  | 6874 | 4083 | 70     |
| H(8)   | 4329  | 8091 | 2303 | 64     |
| H(9)   | 5915  | 7124 | 509  | 63     |
| H(10)  | 6805  | 4906 | 519  | 54     |
| H(14A) | -1956 | 6745 | 4581 | 119    |
| H(14B) | -1883 | 7166 | 3198 | 119    |
| H(14C) | -387  | 7384 | 3749 | 119    |
| H(16A) | 1316  | 4488 | 2105 | 110    |
| H(16B) | 1588  | 6010 | 2181 | 110    |
| H(16C) | 348   | 5545 | 1463 | 110    |
| H(2O)  | -1036 | 1610 | 4143 | 49(10) |
| H(1O)  | -394  | 2843 | 3681 | 64(12) |

Table S20. Torsion angles [°] for **5**.

---

|                       |             |                        |           |
|-----------------------|-------------|------------------------|-----------|
| C(13)-Re(1)-O(1)-C(3) | 98.93(19)   | N(1)-C(2)-C(3)-O(1)    | 2.3(3)    |
| C(12)-Re(1)-O(1)-C(3) | -34.6(8)    | C(1)-C(2)-C(3)-O(1)    | -176.7(3) |
| C(11)-Re(1)-O(1)-C(3) | -171.12(18) | N(2)-N(3)-C(4)-C(5)    | 58.3(3)   |
| N(1)-Re(1)-O(1)-C(3)  | 5.79(17)    | C(1)-N(3)-C(4)-C(5)    | -123.4(3) |
| O(6)-Re(1)-O(1)-C(3)  | -76.62(17)  | N(3)-C(4)-C(5)-C(10)   | -119.2(3) |
| C(13)-Re(1)-N(1)-N(2) | 84.4(2)     | N(3)-C(4)-C(5)-C(6)    | 60.3(4)   |
| C(12)-Re(1)-N(1)-N(2) | -5.7(3)     | C(10)-C(5)-C(6)-C(7)   | -1.8(5)   |
| C(11)-Re(1)-N(1)-N(2) | -163.6(5)   | C(4)-C(5)-C(6)-C(7)    | 178.7(3)  |
| O(1)-Re(1)-N(1)-N(2)  | 178.8(2)    | C(5)-C(6)-C(7)-C(8)    | 0.8(6)    |
| O(6)-Re(1)-N(1)-N(2)  | -100.9(2)   | C(6)-C(7)-C(8)-C(9)    | 0.4(6)    |
| C(13)-Re(1)-N(1)-C(2) | -98.43(18)  | C(7)-C(8)-C(9)-C(10)   | -0.6(6)   |
| C(12)-Re(1)-N(1)-C(2) | 171.46(18)  | C(6)-C(5)-C(10)-C(9)   | 1.7(5)    |
| C(11)-Re(1)-N(1)-C(2) | 13.5(6)     | C(4)-C(5)-C(10)-C(9)   | -178.9(3) |
| O(1)-Re(1)-N(1)-C(2)  | -4.11(16)   | C(8)-C(9)-C(10)-C(5)   | -0.5(6)   |
| O(6)-Re(1)-N(1)-C(2)  | 76.21(17)   | C(13)-Re(1)-C(11)-O(3) | 144(30)   |
| C(2)-N(1)-N(2)-N(3)   | 0.3(3)      | C(12)-Re(1)-C(11)-O(3) | -127(30)  |
| Re(1)-N(1)-N(2)-N(3)  | 177.54(17)  | N(1)-Re(1)-C(11)-O(3)  | 31(30)    |
| N(1)-N(2)-N(3)-C(1)   | -0.1(3)     | O(1)-Re(1)-C(11)-O(3)  | 48(30)    |
| N(1)-N(2)-N(3)-C(4)   | 178.4(2)    | O(6)-Re(1)-C(11)-O(3)  | -30(30)   |
| N(2)-N(3)-C(1)-C(2)   | -0.1(3)     | C(13)-Re(1)-C(12)-O(4) | -141(20)  |
| C(4)-N(3)-C(1)-C(2)   | -178.5(2)   | C(11)-Re(1)-C(12)-O(4) | 129(20)   |
| N(2)-N(1)-C(2)-C(1)   | -0.4(3)     | N(1)-Re(1)-C(12)-O(4)  | -47(20)   |
| Re(1)-N(1)-C(2)-C(1)  | -178.21(16) | O(1)-Re(1)-C(12)-O(4)  | -8(20)    |
| N(2)-N(1)-C(2)-C(3)   | -179.6(2)   | O(6)-Re(1)-C(12)-O(4)  | 34(20)    |
| Re(1)-N(1)-C(2)-C(3)  | 2.6(3)      | C(12)-Re(1)-C(13)-O(5) | 147(9)    |
| N(3)-C(1)-C(2)-N(1)   | 0.3(3)      | C(11)-Re(1)-C(13)-O(5) | -124(9)   |
| N(3)-C(1)-C(2)-C(3)   | 179.3(3)    | N(1)-Re(1)-C(13)-O(5)  | 47(9)     |
| Re(1)-O(1)-C(3)-O(2)  | 175.21(18)  | O(1)-Re(1)-C(13)-O(5)  | -28(9)    |
| Re(1)-O(1)-C(3)-C(2)  | -6.1(3)     | O(6)-Re(1)-C(13)-O(5)  | 5(9)      |
| N(1)-C(2)-C(3)-O(2)   | -179.0(2)   |                        |           |
| C(1)-C(2)-C(3)-O(2)   | 2.1(4)      |                        |           |

---

Table S21. Hydrogen bonds for **5** [ $\text{\AA}$  and  $^\circ$ ].

| D-H...A             | d(D-H) | d(H...A) | d(D...A) | $\angle(\text{DHA})$ |
|---------------------|--------|----------|----------|----------------------|
| O(6)-H(2O)...O(2)#1 | 0.86   | 1.75     | 2.610(3) | 173.6                |
| O(6)-H(1O)...O(7)   | 0.90   | 1.77     | 2.662(3) | 169.8                |

Symmetry transformations used to generate equivalent atoms: #1 -x,-y,-z+1

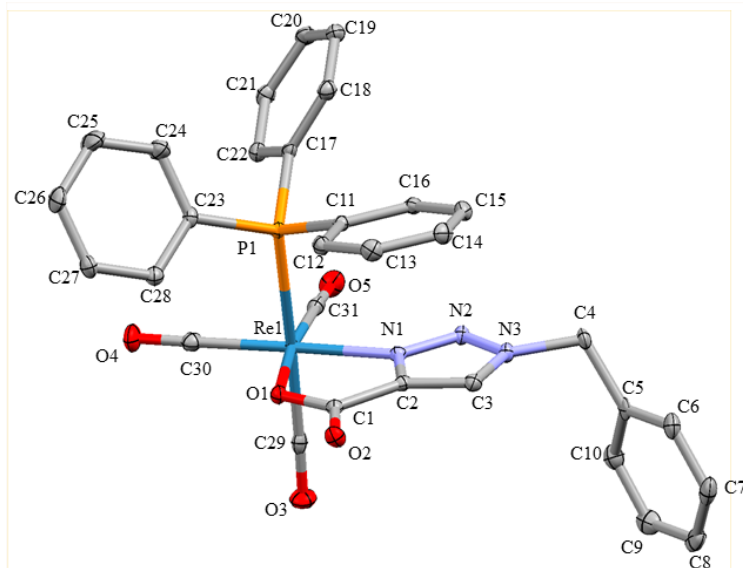

Table S22. Crystal data and structure refinement for **6**.

|                                   |                                                                   |                  |
|-----------------------------------|-------------------------------------------------------------------|------------------|
| Empirical formula                 | C <sub>33</sub> H <sub>29</sub> N <sub>3</sub> O <sub>6</sub> PRE |                  |
| Formula weight                    | 780.76                                                            |                  |
| Temperature                       | 100(2) K                                                          |                  |
| Wavelength                        | 0.71073 Å                                                         |                  |
| Crystal system, space group       | Triclinic, P-1                                                    |                  |
| Unit cell dimensions              | a = 10.1876(14) Å                                                 | α = 86.0620(10)° |
|                                   | b = 10.5072(14) Å                                                 | β = 70.4170(10)° |
|                                   | c = 15.090(2) Å                                                   | γ = 86.9510(10)° |
| Volume                            | 1517.5(4) Å <sup>3</sup>                                          |                  |
| Z                                 | 2                                                                 |                  |
| Density (calculated)              | 1.709 Mg/m <sup>3</sup>                                           |                  |
| Absorption coefficient            | 4.107 mm <sup>-1</sup>                                            |                  |
| F(000)                            | 772                                                               |                  |
| Crystal size                      | 0.500 x 0.500 x 0.200 mm <sup>3</sup>                             |                  |
| Theta range for data collection   | 1.434 to 26.367°                                                  |                  |
| Index ranges                      | -12 ≤ h ≤ 12, -13 ≤ k ≤ 13, -18 ≤ l ≤ 18                          |                  |
| Reflections collected             | 16777                                                             |                  |
| Independent reflections           | 6183 [R(int) = 0.0175]                                            |                  |
| Completeness to theta = 25.242°   | 99.8 %                                                            |                  |
| Absorption correction             | Semi-empirical from equivalents                                   |                  |
| Max. and min. transmission        | 0.49 and 0.33                                                     |                  |
| Refinement method                 | Full-matrix least-squares on F <sup>2</sup>                       |                  |
| Data / restraints / parameters    | 6183 / 0 / 402                                                    |                  |
| Goodness-of-fit on F <sup>2</sup> | 1.079                                                             |                  |
| Final R indices [I > 2σ(I)]       | R <sub>1</sub> = 0.0141, wR <sub>2</sub> = 0.0338                 |                  |
| R indices (all data)              | R <sub>1</sub> = 0.0145, wR <sub>2</sub> = 0.0339                 |                  |
| Extinction coefficient            | n/a                                                               |                  |
| Largest diff. peak and hole       | 0.875 and -0.635 e.Å <sup>-3</sup>                                |                  |

Table S23. Atomic coordinates ( $\times 10^4$ ) and equivalent isotropic displacement parameters ( $\text{\AA}^2 \times 10^3$ ) for **6**.  $U(\text{eq})$  is defined as one third of the trace of the orthogonalized  $U^{ij}$  tensor.

|       | x       | y        | z       | $U(\text{eq})$ |
|-------|---------|----------|---------|----------------|
| Re(1) | 4464(1) | 4209(1)  | 2878(1) | 9(1)           |
| P(1)  | 3976(1) | 2560(1)  | 1911(1) | 9(1)           |
| O(1)  | 6130(1) | 2874(1)  | 2984(1) | 12(1)          |
| N(1)  | 3522(2) | 2983(1)  | 4112(1) | 10(1)          |
| C(1)  | 5867(2) | 2045(2)  | 3684(1) | 11(1)          |
| O(2)  | 6724(1) | 1280(1)  | 3853(1) | 15(1)          |
| N(2)  | 2252(2) | 2897(2)  | 4719(1) | 12(1)          |
| C(2)  | 4391(2) | 2072(2)  | 4317(1) | 10(1)          |
| O(3)  | 5342(2) | 6087(1)  | 4059(1) | 21(1)          |
| N(3)  | 2331(2) | 1910(2)  | 5318(1) | 11(1)          |
| C(3)  | 3622(2) | 1373(2)  | 5102(1) | 12(1)          |
| O(4)  | 6107(2) | 5669(2)  | 1036(1) | 24(1)          |
| C(4)  | 1072(2) | 1552(2)  | 6111(1) | 15(1)          |
| O(5)  | 1890(2) | 5934(1)  | 3004(1) | 21(1)          |
| C(5)  | 1264(2) | 1769(2)  | 7039(1) | 14(1)          |
| C(6)  | 1328(2) | 745(2)   | 7658(1) | 17(1)          |
| C(7)  | 1542(2) | 952(2)   | 8501(1) | 21(1)          |
| C(8)  | 1729(2) | 2176(2)  | 8714(2) | 23(1)          |
| C(9)  | 1655(2) | 3201(2)  | 8101(2) | 22(1)          |
| C(10) | 1414(2) | 3006(2)  | 7271(2) | 18(1)          |
| C(11) | 3739(2) | 995(2)   | 2542(1) | 10(1)          |
| C(12) | 4879(2) | 145(2)   | 2419(1) | 13(1)          |
| C(13) | 4761(2) | -969(2)  | 2994(1) | 15(1)          |
| C(14) | 3508(2) | -1238(2) | 3695(1) | 15(1)          |
| C(15) | 2362(2) | -400(2)  | 3817(1) | 14(1)          |
| C(16) | 2469(2) | 712(2)   | 3248(1) | 12(1)          |
| C(17) | 2455(2) | 2911(2)  | 1543(1) | 11(1)          |
| C(18) | 1494(2) | 2000(2)  | 1555(1) | 14(1)          |
| C(19) | 332(2)  | 2363(2)  | 1301(1) | 16(1)          |
| C(20) | 128(2)  | 3622(2)  | 1021(1) | 16(1)          |
| C(21) | 1102(2) | 4520(2)  | 972(1)  | 16(1)          |
| C(22) | 2260(2) | 4170(2)  | 1233(1) | 13(1)          |
| C(23) | 5392(2) | 2290(2)  | 805(1)  | 11(1)          |
| C(24) | 5120(2) | 1991(2)  | -1(2)   | 20(1)          |
| C(25) | 6209(2) | 1786(2)  | -833(2) | 25(1)          |
| C(26) | 7581(2) | 1863(2)  | -864(1) | 20(1)          |
| C(27) | 7857(2) | 2145(2)  | -63(1)  | 16(1)          |
| C(28) | 6777(2) | 2372(2)  | 767(1)  | 14(1)          |
| C(29) | 5000(2) | 5391(2)  | 3629(1) | 14(1)          |
| C(30) | 5498(2) | 5125(2)  | 1728(1) | 15(1)          |
| C(31) | 2860(2) | 5281(2)  | 2942(1) | 14(1)          |
| O(1S) | 9300(2) | 1886(1)  | 3904(1) | 22(1)          |
| C(1S) | 8592(3) | 3957(2)  | 4565(2) | 32(1)          |
| C(2S) | 9504(2) | 3229(2)  | 3754(2) | 19(1)          |

Table S24. Bond lengths [Å] and angles [°] for **6**.

|                   |            |                  |           |
|-------------------|------------|------------------|-----------|
| Re(1)-C(31)       | 1.913(2)   | C(12)-H(12)      | 0.9500    |
| Re(1)-C(30)       | 1.924(2)   | C(13)-C(14)      | 1.386(3)  |
| Re(1)-C(29)       | 1.951(2)   | C(13)-H(13)      | 0.9500    |
| Re(1)-N(1)        | 2.1570(15) | C(14)-C(15)      | 1.392(3)  |
| Re(1)-O(1)        | 2.1843(13) | C(14)-H(14)      | 0.9500    |
| Re(1)-P(1)        | 2.5098(5)  | C(15)-C(16)      | 1.389(3)  |
| P(1)-C(17)        | 1.8247(19) | C(15)-H(15)      | 0.9500    |
| P(1)-C(11)        | 1.8279(19) | C(16)-H(16)      | 0.9500    |
| P(1)-C(23)        | 1.8316(19) | C(17)-C(22)      | 1.399(3)  |
| O(1)-C(1)         | 1.287(2)   | C(17)-C(18)      | 1.400(3)  |
| N(1)-N(2)         | 1.314(2)   | C(18)-C(19)      | 1.390(3)  |
| N(1)-C(2)         | 1.360(2)   | C(18)-H(18)      | 0.9500    |
| C(1)-O(2)         | 1.233(2)   | C(19)-C(20)      | 1.387(3)  |
| C(1)-C(2)         | 1.486(3)   | C(19)-H(19)      | 0.9500    |
| N(2)-N(3)         | 1.345(2)   | C(20)-C(21)      | 1.386(3)  |
| C(2)-C(3)         | 1.369(3)   | C(20)-H(20)      | 0.9500    |
| O(3)-C(29)        | 1.149(2)   | C(21)-C(22)      | 1.389(3)  |
| N(3)-C(3)         | 1.346(2)   | C(21)-H(21)      | 0.9500    |
| N(3)-C(4)         | 1.476(2)   | C(22)-H(22)      | 0.9500    |
| C(3)-H(3)         | 0.9500     | C(23)-C(24)      | 1.393(3)  |
| O(4)-C(30)        | 1.150(2)   | C(23)-C(28)      | 1.400(3)  |
| C(4)-C(5)         | 1.511(3)   | C(24)-C(25)      | 1.390(3)  |
| C(4)-H(4A)        | 0.9900     | C(24)-H(24)      | 0.9500    |
| C(4)-H(4B)        | 0.9900     | C(25)-C(26)      | 1.390(3)  |
| O(5)-C(31)        | 1.154(2)   | C(25)-H(25)      | 0.9500    |
| C(5)-C(6)         | 1.390(3)   | C(26)-C(27)      | 1.384(3)  |
| C(5)-C(10)        | 1.397(3)   | C(26)-H(26)      | 0.9500    |
| C(6)-C(7)         | 1.393(3)   | C(27)-C(28)      | 1.388(3)  |
| C(6)-H(6)         | 0.9500     | C(27)-H(27)      | 0.9500    |
| C(7)-C(8)         | 1.385(3)   | C(28)-H(28)      | 0.9500    |
| C(7)-H(7)         | 0.9500     | O(1S)-C(2S)      | 1.429(2)  |
| C(8)-C(9)         | 1.387(3)   | O(1S)-H(1OS)     | 0.74(3)   |
| C(8)-H(8)         | 0.9500     | C(1S)-C(2S)      | 1.495(3)  |
| C(9)-C(10)        | 1.385(3)   | C(1S)-H(1S1)     | 0.9800    |
| C(9)-H(9)         | 0.9500     | C(1S)-H(1S2)     | 0.9800    |
| C(10)-H(10)       | 0.9500     | C(1S)-H(1S3)     | 0.9800    |
| C(11)-C(12)       | 1.396(3)   | C(2S)-H(2S1)     | 0.9900    |
| C(11)-C(16)       | 1.404(3)   | C(2S)-H(2S2)     | 0.9900    |
| C(12)-C(13)       | 1.393(3)   |                  |           |
| C(31)-Re(1)-C(30) | 89.51(8)   | N(1)-Re(1)-O(1)  | 74.68(5)  |
| C(31)-Re(1)-C(29) | 89.44(8)   | C(31)-Re(1)-P(1) | 96.01(6)  |
| C(30)-Re(1)-C(29) | 91.34(8)   | C(30)-Re(1)-P(1) | 88.82(6)  |
| C(31)-Re(1)-N(1)  | 97.85(7)   | C(29)-Re(1)-P(1) | 174.56(6) |
| C(30)-Re(1)-N(1)  | 172.28(7)  | N(1)-Re(1)-P(1)  | 88.10(4)  |
| C(29)-Re(1)-N(1)  | 91.07(7)   | O(1)-Re(1)-P(1)  | 84.80(4)  |
| C(31)-Re(1)-O(1)  | 172.47(6)  | C(17)-P(1)-C(11) | 107.32(8) |
| C(30)-Re(1)-O(1)  | 97.99(7)   | C(17)-P(1)-C(23) | 103.76(9) |
| C(29)-Re(1)-O(1)  | 89.79(7)   | C(11)-P(1)-C(23) | 104.28(8) |

|                   |            |                    |            |
|-------------------|------------|--------------------|------------|
| C(17)-P(1)-Re(1)  | 115.22(6)  | C(14)-C(13)-H(13)  | 120.0      |
| C(11)-P(1)-Re(1)  | 111.16(6)  | C(12)-C(13)-H(13)  | 120.0      |
| C(23)-P(1)-Re(1)  | 114.19(6)  | C(13)-C(14)-C(15)  | 119.88(18) |
| C(1)-O(1)-Re(1)   | 118.77(11) | C(13)-C(14)-H(14)  | 120.1      |
| N(2)-N(1)-C(2)    | 110.91(15) | C(15)-C(14)-H(14)  | 120.1      |
| N(2)-N(1)-Re(1)   | 133.83(12) | C(16)-C(15)-C(14)  | 120.50(18) |
| C(2)-N(1)-Re(1)   | 115.24(12) | C(16)-C(15)-H(15)  | 119.8      |
| O(2)-C(1)-O(1)    | 125.42(17) | C(14)-C(15)-H(15)  | 119.8      |
| O(2)-C(1)-C(2)    | 120.40(17) | C(15)-C(16)-C(11)  | 119.88(17) |
| O(1)-C(1)-C(2)    | 114.18(16) | C(15)-C(16)-H(16)  | 120.1      |
| N(1)-N(2)-N(3)    | 104.77(14) | C(11)-C(16)-H(16)  | 120.1      |
| N(1)-C(2)-C(3)    | 107.40(16) | C(22)-C(17)-C(18)  | 119.12(17) |
| N(1)-C(2)-C(1)    | 117.06(16) | C(22)-C(17)-P(1)   | 117.04(14) |
| C(3)-C(2)-C(1)    | 135.54(17) | C(18)-C(17)-P(1)   | 123.83(14) |
| N(2)-N(3)-C(3)    | 112.68(15) | C(19)-C(18)-C(17)  | 119.98(18) |
| N(2)-N(3)-C(4)    | 119.31(15) | C(19)-C(18)-H(18)  | 120.0      |
| C(3)-N(3)-C(4)    | 128.00(16) | C(17)-C(18)-H(18)  | 120.0      |
| N(3)-C(3)-C(2)    | 104.23(16) | C(20)-C(19)-C(18)  | 120.34(18) |
| N(3)-C(3)-H(3)    | 127.9      | C(20)-C(19)-H(19)  | 119.8      |
| C(2)-C(3)-H(3)    | 127.9      | C(18)-C(19)-H(19)  | 119.8      |
| N(3)-C(4)-C(5)    | 110.45(15) | C(21)-C(20)-C(19)  | 120.03(18) |
| N(3)-C(4)-H(4A)   | 109.6      | C(21)-C(20)-H(20)  | 120.0      |
| C(5)-C(4)-H(4A)   | 109.6      | C(19)-C(20)-H(20)  | 120.0      |
| N(3)-C(4)-H(4B)   | 109.6      | C(20)-C(21)-C(22)  | 120.06(18) |
| C(5)-C(4)-H(4B)   | 109.6      | C(20)-C(21)-H(21)  | 120.0      |
| H(4A)-C(4)-H(4B)  | 108.1      | C(22)-C(21)-H(21)  | 120.0      |
| C(6)-C(5)-C(10)   | 119.40(19) | C(21)-C(22)-C(17)  | 120.38(18) |
| C(6)-C(5)-C(4)    | 120.57(18) | C(21)-C(22)-H(22)  | 119.8      |
| C(10)-C(5)-C(4)   | 120.01(18) | C(17)-C(22)-H(22)  | 119.8      |
| C(5)-C(6)-C(7)    | 120.12(19) | C(24)-C(23)-C(28)  | 119.10(18) |
| C(5)-C(6)-H(6)    | 119.9      | C(24)-C(23)-P(1)   | 121.31(15) |
| C(7)-C(6)-H(6)    | 119.9      | C(28)-C(23)-P(1)   | 119.58(14) |
| C(8)-C(7)-C(6)    | 120.2(2)   | C(25)-C(24)-C(23)  | 120.50(19) |
| C(8)-C(7)-H(7)    | 119.9      | C(25)-C(24)-H(24)  | 119.7      |
| C(6)-C(7)-H(7)    | 119.9      | C(23)-C(24)-H(24)  | 119.7      |
| C(7)-C(8)-C(9)    | 119.8(2)   | C(26)-C(25)-C(24)  | 120.0(2)   |
| C(7)-C(8)-H(8)    | 120.1      | C(26)-C(25)-H(25)  | 120.0      |
| C(9)-C(8)-H(8)    | 120.1      | C(24)-C(25)-H(25)  | 120.0      |
| C(10)-C(9)-C(8)   | 120.4(2)   | C(27)-C(26)-C(25)  | 119.70(19) |
| C(10)-C(9)-H(9)   | 119.8      | C(27)-C(26)-H(26)  | 120.2      |
| C(8)-C(9)-H(9)    | 119.8      | C(25)-C(26)-H(26)  | 120.2      |
| C(9)-C(10)-C(5)   | 120.1(2)   | C(26)-C(27)-C(28)  | 120.64(19) |
| C(9)-C(10)-H(10)  | 120.0      | C(26)-C(27)-H(27)  | 119.7      |
| C(5)-C(10)-H(10)  | 120.0      | C(28)-C(27)-H(27)  | 119.7      |
| C(12)-C(11)-C(16) | 119.23(17) | C(27)-C(28)-C(23)  | 119.99(18) |
| C(12)-C(11)-P(1)  | 119.88(14) | C(27)-C(28)-H(28)  | 120.0      |
| C(16)-C(11)-P(1)  | 120.27(14) | C(23)-C(28)-H(28)  | 120.0      |
| C(13)-C(12)-C(11) | 120.46(17) | O(3)-C(29)-Re(1)   | 178.63(18) |
| C(13)-C(12)-H(12) | 119.8      | O(4)-C(30)-Re(1)   | 179.29(18) |
| C(11)-C(12)-H(12) | 119.8      | O(5)-C(31)-Re(1)   | 178.24(17) |
| C(14)-C(13)-C(12) | 120.05(18) | C(2S)-O(1S)-H(10S) | 107(2)     |



|                     |       |                     |            |
|---------------------|-------|---------------------|------------|
| C(2S)-C(1S)-H(1S1)  | 109.5 | O(1S)-C(2S)-C(1S)   | 112.27(18) |
| C(2S)-C(1S)-H(1S2)  | 109.5 | O(1S)-C(2S)-H(2S1)  | 109.2      |
| H(1S1)-C(1S)-H(1S2) | 109.5 | C(1S)-C(2S)-H(2S1)  | 109.2      |
| C(2S)-C(1S)-H(1S3)  | 109.5 | O(1S)-C(2S)-H(2S2)  | 109.2      |
| H(1S1)-C(1S)-H(1S3) | 109.5 | C(1S)-C(2S)-H(2S2)  | 109.2      |
| H(1S2)-C(1S)-H(1S3) | 109.5 | H(2S1)-C(2S)-H(2S2) | 107.9      |

---

Table S25. Anisotropic displacement parameters ( $\text{\AA}^2 \times 10^3$ ) for **6**. The anisotropic displacement factor exponent takes the form:  $-2\pi^2 [h^2 a^{*2} U^{11} + \dots + 2 h k a^* b^* U^{12}]$

|       | U <sup>11</sup> | U <sup>22</sup> | U <sup>33</sup> | U <sup>23</sup> | U <sup>13</sup> | U <sup>12</sup> |
|-------|-----------------|-----------------|-----------------|-----------------|-----------------|-----------------|
| Re(1) | 9(1)            | 8(1)            | 8(1)            | 1(1)            | -2(1)           | -1(1)           |
| P(1)  | 8(1)            | 10(1)           | 8(1)            | 0(1)            | -2(1)           | 0(1)            |
| O(1)  | 10(1)           | 13(1)           | 10(1)           | 1(1)            | -2(1)           | 0(1)            |
| N(1)  | 11(1)           | 10(1)           | 10(1)           | -1(1)           | -3(1)           | -1(1)           |
| C(1)  | 12(1)           | 12(1)           | 10(1)           | -2(1)           | -3(1)           | -3(1)           |
| O(2)  | 12(1)           | 14(1)           | 18(1)           | 2(1)            | -6(1)           | 1(1)            |
| N(2)  | 12(1)           | 12(1)           | 9(1)            | 0(1)            | -1(1)           | -1(1)           |
| C(2)  | 13(1)           | 9(1)            | 10(1)           | -1(1)           | -6(1)           | 0(1)            |
| O(3)  | 27(1)           | 17(1)           | 22(1)           | -5(1)           | -11(1)          | -3(1)           |
| N(3)  | 11(1)           | 11(1)           | 10(1)           | 1(1)            | -1(1)           | -2(1)           |
| C(3)  | 12(1)           | 12(1)           | 11(1)           | -1(1)           | -4(1)           | -1(1)           |
| O(4)  | 27(1)           | 24(1)           | 16(1)           | 7(1)            | -2(1)           | -9(1)           |
| C(4)  | 10(1)           | 18(1)           | 13(1)           | 2(1)            | 1(1)            | -4(1)           |
| O(5)  | 21(1)           | 21(1)           | 20(1)           | -2(1)           | -7(1)           | 9(1)            |
| C(5)  | 7(1)            | 18(1)           | 11(1)           | 0(1)            | 3(1)            | 0(1)            |
| C(6)  | 15(1)           | 17(1)           | 14(1)           | 1(1)            | 2(1)            | -1(1)           |
| C(7)  | 16(1)           | 28(1)           | 13(1)           | 5(1)            | 1(1)            | 4(1)            |
| C(8)  | 14(1)           | 39(1)           | 12(1)           | -7(1)           | -1(1)           | 4(1)            |
| C(9)  | 17(1)           | 24(1)           | 25(1)           | -10(1)          | -3(1)           | 3(1)            |
| C(10) | 16(1)           | 17(1)           | 20(1)           | -1(1)           | -3(1)           | 1(1)            |
| C(11) | 12(1)           | 10(1)           | 10(1)           | 0(1)            | -5(1)           | -2(1)           |
| C(12) | 11(1)           | 14(1)           | 13(1)           | -1(1)           | -2(1)           | -1(1)           |
| C(13) | 15(1)           | 12(1)           | 18(1)           | -1(1)           | -6(1)           | 2(1)            |
| C(14) | 19(1)           | 12(1)           | 16(1)           | 4(1)            | -7(1)           | -3(1)           |
| C(15) | 13(1)           | 17(1)           | 13(1)           | 1(1)            | -2(1)           | -5(1)           |
| C(16) | 10(1)           | 14(1)           | 12(1)           | -3(1)           | -4(1)           | 0(1)            |
| C(17) | 9(1)            | 16(1)           | 7(1)            | -1(1)           | -1(1)           | 1(1)            |
| C(18) | 16(1)           | 13(1)           | 13(1)           | 2(1)            | -6(1)           | -1(1)           |
| C(19) | 15(1)           | 21(1)           | 13(1)           | 2(1)            | -6(1)           | -5(1)           |
| C(20) | 13(1)           | 23(1)           | 14(1)           | 0(1)            | -6(1)           | 2(1)            |
| C(21) | 18(1)           | 16(1)           | 13(1)           | 1(1)            | -6(1)           | 2(1)            |
| C(22) | 14(1)           | 15(1)           | 11(1)           | 0(1)            | -3(1)           | -2(1)           |
| C(23) | 12(1)           | 9(1)            | 10(1)           | 1(1)            | -1(1)           | 0(1)            |
| C(24) | 14(1)           | 29(1)           | 17(1)           | -4(1)           | -6(1)           | 0(1)            |
| C(25) | 23(1)           | 40(1)           | 14(1)           | -10(1)          | -6(1)           | 0(1)            |
| C(26) | 17(1)           | 25(1)           | 12(1)           | -4(1)           | 2(1)            | 1(1)            |
| C(27) | 10(1)           | 18(1)           | 16(1)           | 0(1)            | -1(1)           | -1(1)           |
| C(28) | 14(1)           | 15(1)           | 13(1)           | -1(1)           | -3(1)           | -2(1)           |
| C(29) | 15(1)           | 13(1)           | 12(1)           | 4(1)            | -1(1)           | 1(1)            |
| C(30) | 17(1)           | 14(1)           | 15(1)           | -1(1)           | -7(1)           | -1(1)           |
| C(31) | 19(1)           | 13(1)           | 9(1)            | 0(1)            | -4(1)           | -2(1)           |
| O(1S) | 12(1)           | 16(1)           | 38(1)           | -2(1)           | -7(1)           | 0(1)            |
| C(1S) | 45(2)           | 21(1)           | 22(1)           | -2(1)           | -1(1)           | 3(1)            |
| C(2S) | 18(1)           | 18(1)           | 20(1)           | 1(1)            | -4(1)           | -1(1)           |

Table S26. Hydrogen coordinates ( $\times 10^4$ ) and isotropic displacement parameters ( $\text{\AA}^2 \times 10^3$ ) for **6**.

|        | x        | y        | z        | U(eq) |
|--------|----------|----------|----------|-------|
| H(3)   | 3930     | 671      | 5421     | 14    |
| H(4A)  | 888      | 642      | 6087     | 18    |
| H(4B)  | 259      | 2069     | 6056     | 18    |
| H(6)   | 1224     | -99      | 7507     | 20    |
| H(7)   | 1561     | 252      | 8930     | 25    |
| H(8)   | 1907     | 2313     | 9278     | 27    |
| H(9)   | 1770     | 4042     | 8251     | 27    |
| H(10)  | 1351     | 3713     | 6858     | 22    |
| H(12)  | 5741     | 327      | 1941     | 15    |
| H(13)  | 5540     | -1544    | 2905     | 18    |
| H(14)  | 3430     | -1992    | 4092     | 19    |
| H(15)  | 1502     | -591     | 4294     | 17    |
| H(16)  | 1684     | 1280     | 3335     | 14    |
| H(18)  | 1637     | 1135     | 1737     | 17    |
| H(19)  | -326     | 1746     | 1319     | 19    |
| H(20)  | -680     | 3869     | 862      | 19    |
| H(21)  | 976      | 5376     | 761      | 19    |
| H(22)  | 2924     | 4788     | 1200     | 16    |
| H(24)  | 4184     | 1926     | 19       | 24    |
| H(25)  | 6014     | 1594     | -1382    | 30    |
| H(26)  | 8326     | 1724     | -1433    | 24    |
| H(27)  | 8796     | 2183     | -81      | 19    |
| H(28)  | 6977     | 2584     | 1309     | 17    |
| H(10S) | 8610(30) | 1770(20) | 3879(19) | 25(7) |
| H(1S1) | 7617     | 3906     | 4603     | 48    |
| H(1S2) | 8857     | 4852     | 4472     | 48    |
| H(1S3) | 8706     | 3589     | 5150     | 48    |
| H(2S1) | 9303     | 3536     | 3176     | 23    |
| H(2S2) | 10492    | 3397     | 3655     | 23    |

Table S27. Torsion angles [°] for **6**.

|                        |             |                         |             |
|------------------------|-------------|-------------------------|-------------|
| Re(1)-O(1)-C(1)-O(2)   | -176.35(14) | C(16)-C(11)-C(12)-C(13) | -0.3(3)     |
| Re(1)-O(1)-C(1)-C(2)   | 3.2(2)      | P(1)-C(11)-C(12)-C(13)  | 170.59(15)  |
| C(2)-N(1)-N(2)-N(3)    | 0.07(19)    | C(11)-C(12)-C(13)-C(14) | -0.2(3)     |
| Re(1)-N(1)-N(2)-N(3)   | 178.41(12)  | C(12)-C(13)-C(14)-C(15) | 0.7(3)      |
| N(2)-N(1)-C(2)-C(3)    | -0.2(2)     | C(13)-C(14)-C(15)-C(16) | -0.7(3)     |
| Re(1)-N(1)-C(2)-C(3)   | -178.85(12) | C(14)-C(15)-C(16)-C(11) | 0.1(3)      |
| N(2)-N(1)-C(2)-C(1)    | 179.62(15)  | C(12)-C(11)-C(16)-C(15) | 0.4(3)      |
| Re(1)-N(1)-C(2)-C(1)   | 0.9(2)      | P(1)-C(11)-C(16)-C(15)  | -170.50(14) |
| O(2)-C(1)-C(2)-N(1)    | 176.84(16)  | C(11)-P(1)-C(17)-C(22)  | 166.27(14)  |
| O(1)-C(1)-C(2)-N(1)    | -2.7(2)     | C(23)-P(1)-C(17)-C(22)  | -83.70(16)  |
| O(2)-C(1)-C(2)-C(3)    | -3.5(3)     | Re(1)-P(1)-C(17)-C(22)  | 41.88(16)   |
| O(1)-C(1)-C(2)-C(3)    | 177.0(2)    | C(11)-P(1)-C(17)-C(18)  | -13.82(18)  |
| N(1)-N(2)-N(3)-C(3)    | 0.1(2)      | C(23)-P(1)-C(17)-C(18)  | 96.20(17)   |
| N(1)-N(2)-N(3)-C(4)    | 179.21(15)  | Re(1)-P(1)-C(17)-C(18)  | -138.22(14) |
| N(2)-N(3)-C(3)-C(2)    | -0.2(2)     | C(22)-C(17)-C(18)-C(19) | -2.8(3)     |
| C(4)-N(3)-C(3)-C(2)    | -179.22(17) | P(1)-C(17)-C(18)-C(19)  | 177.25(15)  |
| N(1)-C(2)-C(3)-N(3)    | 0.2(2)      | C(17)-C(18)-C(19)-C(20) | 1.0(3)      |
| C(1)-C(2)-C(3)-N(3)    | -179.5(2)   | C(18)-C(19)-C(20)-C(21) | 1.5(3)      |
| N(2)-N(3)-C(4)-C(5)    | -114.85(18) | C(19)-C(20)-C(21)-C(22) | -2.1(3)     |
| C(3)-N(3)-C(4)-C(5)    | 64.1(2)     | C(20)-C(21)-C(22)-C(17) | 0.2(3)      |
| N(3)-C(4)-C(5)-C(6)    | -113.47(19) | C(18)-C(17)-C(22)-C(21) | 2.3(3)      |
| N(3)-C(4)-C(5)-C(10)   | 64.9(2)     | P(1)-C(17)-C(22)-C(21)  | -177.79(15) |
| C(10)-C(5)-C(6)-C(7)   | -0.1(3)     | C(17)-P(1)-C(23)-C(24)  | -19.73(18)  |
| C(4)-C(5)-C(6)-C(7)    | 178.24(18)  | C(11)-P(1)-C(23)-C(24)  | 92.52(17)   |
| C(5)-C(6)-C(7)-C(8)    | -1.7(3)     | Re(1)-P(1)-C(23)-C(24)  | -145.96(15) |
| C(6)-C(7)-C(8)-C(9)    | 2.2(3)      | C(17)-P(1)-C(23)-C(28)  | 160.85(15)  |
| C(7)-C(8)-C(9)-C(10)   | -0.9(3)     | C(11)-P(1)-C(23)-C(28)  | -86.90(16)  |
| C(8)-C(9)-C(10)-C(5)   | -0.9(3)     | Re(1)-P(1)-C(23)-C(28)  | 34.62(17)   |
| C(6)-C(5)-C(10)-C(9)   | 1.4(3)      | C(28)-C(23)-C(24)-C(25) | -0.5(3)     |
| C(4)-C(5)-C(10)-C(9)   | -176.98(18) | P(1)-C(23)-C(24)-C(25)  | -179.88(17) |
| C(17)-P(1)-C(11)-C(12) | 141.15(15)  | C(23)-C(24)-C(25)-C(26) | 0.8(3)      |
| C(23)-P(1)-C(11)-C(12) | 31.48(17)   | C(24)-C(25)-C(26)-C(27) | 0.0(3)      |
| Re(1)-P(1)-C(11)-C(12) | -92.03(15)  | C(25)-C(26)-C(27)-C(28) | -1.1(3)     |
| C(17)-P(1)-C(11)-C(16) | -48.02(17)  | C(26)-C(27)-C(28)-C(23) | 1.4(3)      |
| C(23)-P(1)-C(11)-C(16) | -157.69(15) | C(24)-C(23)-C(28)-C(27) | -0.7(3)     |
| Re(1)-P(1)-C(11)-C(16) | 78.81(15)   | P(1)-C(23)-C(28)-C(27)  | 178.78(15)  |

Table S28. Hydrogen bonds for **6**. [ $\text{\AA}$  and  $^\circ$ ].

---

| D-H...A             | d(D-H)  | d(H...A) | d(D...A) | $\angle$ (DHA) |
|---------------------|---------|----------|----------|----------------|
| O(1S)-H(1OS)...O(2) | 0.74(3) | 2.03(3)  | 2.761(2) | 175(3)         |

---

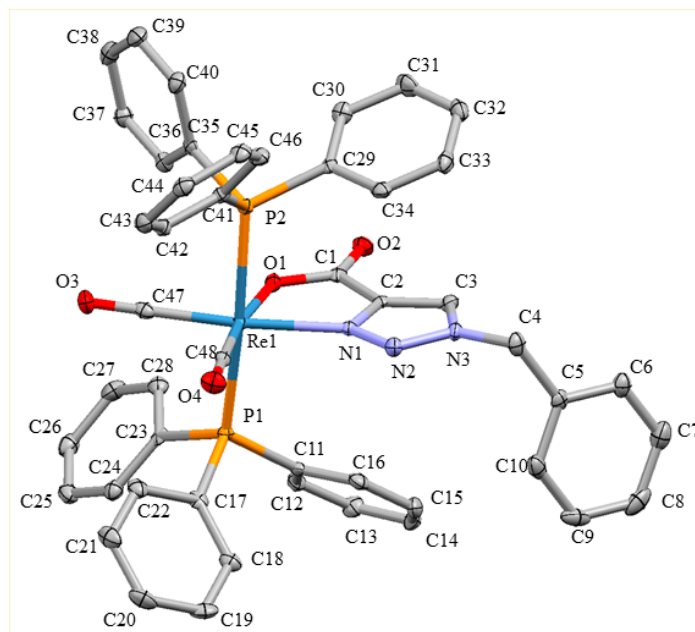

Table S29. Crystal data and structure refinement for 7.

|                                      |                                                              |                              |
|--------------------------------------|--------------------------------------------------------------|------------------------------|
| Empirical formula                    | $C_{49}H_{39}Cl_3N_3O_4P_2Re$                                |                              |
| Formula weight                       | 1088.32                                                      |                              |
| Temperature                          | 100(2) K                                                     |                              |
| Wavelength                           | 0.71073 Å                                                    |                              |
| Crystal system, space group          | Monoclinic, $P2_1/c$                                         |                              |
| Unit cell dimensions                 | $a = 17.1322(6)$ Å                                           | $\alpha = 90^\circ$          |
|                                      | $b = 12.2900(4)$ Å                                           | $\beta = 100.7630(10)^\circ$ |
|                                      | $c = 21.1693(8)$ Å                                           | $\gamma = 90^\circ$          |
| Volume                               | $4378.9(3)$ Å <sup>3</sup>                                   |                              |
| Z                                    | 4                                                            |                              |
| Density (calculated)                 | 1.651 Mg/m <sup>3</sup>                                      |                              |
| Absorption coefficient               | 3.081 mm <sup>-1</sup>                                       |                              |
| F(000)                               | 2168                                                         |                              |
| Crystal size                         | 0.200 x 0.200 x 0.150 mm <sup>3</sup>                        |                              |
| Theta range for data collection      | 1.210 to 26.371°                                             |                              |
| Index ranges                         | $-21 \leq h \leq 21, -15 \leq k \leq 14, -25 \leq l \leq 26$ |                              |
| Reflections collected                | 31375                                                        |                              |
| Independent reflections              | 8949 [R(int) = 0.0473]                                       |                              |
| Completeness to theta = 25.242°      | 99.9 %                                                       |                              |
| Absorption correction                | Semi-empirical from equivalents                              |                              |
| Max. and min. transmission           | 0.66 and 0.60                                                |                              |
| Refinement method                    | Full-matrix least-squares on F <sup>2</sup>                  |                              |
| Data / restraints / parameters       | 8949 / 0 / 559                                               |                              |
| Goodness-of-fit on F <sup>2</sup>    | 1.032                                                        |                              |
| Final R indices [ $I > 2\sigma(I)$ ] | $R_1 = 0.0299, wR_2 = 0.0537$                                |                              |
| R indices (all data)                 | $R_1 = 0.0426, wR_2 = 0.0587$                                |                              |
| Extinction coefficient               | n/a                                                          |                              |
| Largest diff. peak and hole          | 0.753 and -0.622 e.Å <sup>-3</sup>                           |                              |

Table S30. Atomic coordinates ( $\times 10^4$ ) and equivalent isotropic displacement parameters ( $\text{\AA}^2 \times 10^3$ ) for 7.  $U(\text{eq})$  is defined as one third of the trace of the orthogonalized  $U^{ij}$  tensor.

|       | x       | y       | z       | $U(\text{eq})$ |
|-------|---------|---------|---------|----------------|
| Re(1) | 2205(1) | 5448(1) | 3486(1) | 10(1)          |
| P(1)  | 2127(1) | 7355(1) | 3197(1) | 11(1)          |
| O(1)  | 2682(1) | 5909(2) | 4486(1) | 13(1)          |
| N(1)  | 3490(2) | 5378(2) | 3589(1) | 10(1)          |
| C(1)  | 3441(2) | 5843(3) | 4696(2) | 14(1)          |
| P(2)  | 2210(1) | 3592(1) | 3884(1) | 11(1)          |
| O(2)  | 3777(1) | 5971(2) | 5261(1) | 16(1)          |
| N(2)  | 3975(2) | 5090(2) | 3200(1) | 14(1)          |
| C(2)  | 3904(2) | 5574(2) | 4193(2) | 11(1)          |
| O(3)  | 425(1)  | 5521(2) | 3519(1) | 22(1)          |
| N(3)  | 4713(2) | 5102(2) | 3572(1) | 14(1)          |
| C(3)  | 4696(2) | 5393(3) | 4183(2) | 14(1)          |
| O(4)  | 1793(1) | 4792(2) | 2072(1) | 19(1)          |
| C(4)  | 5400(2) | 4785(3) | 3287(2) | 17(1)          |
| C(5)  | 5945(2) | 5732(3) | 3236(2) | 14(1)          |
| C(6)  | 6692(2) | 5779(3) | 3623(2) | 18(1)          |
| C(7)  | 7191(2) | 6652(3) | 3585(2) | 25(1)          |
| C(8)  | 6941(2) | 7507(3) | 3176(2) | 26(1)          |
| C(9)  | 6194(2) | 7478(3) | 2791(2) | 25(1)          |
| C(10) | 5699(2) | 6587(3) | 2809(2) | 21(1)          |
| C(11) | 3030(2) | 8182(3) | 3419(2) | 12(1)          |
| C(12) | 3078(2) | 9053(3) | 3856(2) | 16(1)          |
| C(13) | 3775(2) | 9637(3) | 4026(2) | 18(1)          |
| C(14) | 4437(2) | 9392(3) | 3771(2) | 19(1)          |
| C(15) | 4400(2) | 8525(3) | 3342(2) | 18(1)          |
| C(16) | 3708(2) | 7913(3) | 3172(2) | 16(1)          |
| C(17) | 1769(2) | 7625(3) | 2341(2) | 13(1)          |
| C(18) | 2160(2) | 8258(3) | 1952(2) | 16(1)          |
| C(19) | 1821(2) | 8453(3) | 1309(2) | 21(1)          |
| C(20) | 1076(2) | 8036(3) | 1054(2) | 22(1)          |
| C(21) | 680(2)  | 7398(3) | 1433(2) | 21(1)          |
| C(22) | 1029(2) | 7182(3) | 2068(2) | 17(1)          |
| C(23) | 1414(2) | 8135(3) | 3568(2) | 12(1)          |
| C(24) | 901(2)  | 8899(3) | 3228(2) | 16(1)          |
| C(25) | 424(2)  | 9537(3) | 3540(2) | 20(1)          |
| C(26) | 462(2)  | 9445(3) | 4189(2) | 21(1)          |
| C(27) | 963(2)  | 8676(3) | 4537(2) | 20(1)          |
| C(28) | 1433(2) | 8016(3) | 4228(2) | 16(1)          |
| C(29) | 3178(2) | 3041(3) | 4271(2) | 11(1)          |
| C(30) | 3360(2) | 2834(3) | 4928(2) | 16(1)          |
| C(31) | 4115(2) | 2457(3) | 5207(2) | 23(1)          |
| C(32) | 4689(2) | 2297(3) | 4836(2) | 20(1)          |
| C(33) | 4507(2) | 2498(3) | 4182(2) | 18(1)          |
| C(34) | 3761(2) | 2872(3) | 3902(2) | 16(1)          |
| C(35) | 1597(2) | 3372(3) | 4495(2) | 12(1)          |
| C(36) | 1349(2) | 4241(3) | 4835(2) | 15(1)          |

|        |         |          |         |       |
|--------|---------|----------|---------|-------|
| C(37)  | 890(2)  | 4057(3)  | 5296(2) | 17(1) |
| C(38)  | 685(2)  | 3008(3)  | 5441(2) | 19(1) |
| C(39)  | 942(2)  | 2136(3)  | 5117(2) | 21(1) |
| C(40)  | 1387(2) | 2311(3)  | 4646(2) | 16(1) |
| C(41)  | 1840(2) | 2572(3)  | 3268(2) | 12(1) |
| C(42)  | 1141(2) | 2798(3)  | 2829(2) | 14(1) |
| C(43)  | 864(2)  | 2078(3)  | 2330(2) | 17(1) |
| C(44)  | 1273(2) | 1124(3)  | 2266(2) | 17(1) |
| C(45)  | 1950(2) | 884(3)   | 2708(2) | 17(1) |
| C(46)  | 2230(2) | 1592(3)  | 3211(2) | 16(1) |
| C(47)  | 1106(2) | 5502(3)  | 3508(2) | 15(1) |
| C(48)  | 1944(2) | 5032(3)  | 2618(2) | 14(1) |
| Cl(1S) | 2737(1) | 10289(1) | 5534(1) | 45(1) |
| C(1S)  | 2872(2) | 9142(3)  | 6042(2) | 21(1) |
| Cl(2S) | 3535(1) | 9452(1)  | 6764(1) | 28(1) |
| Cl(3S) | 3216(1) | 8022(1)  | 5660(1) | 26(1) |

---



Table S31. Bond lengths [Å] and angles [°] for 7.

|             |           |             |          |
|-------------|-----------|-------------|----------|
| Re(1)-C(48) | 1.879(4)  | C(17)-C(22) | 1.402(4) |
| Re(1)-C(47) | 1.892(4)  | C(18)-C(19) | 1.397(5) |
| Re(1)-N(1)  | 2.173(3)  | C(18)-H(18) | 0.9500   |
| Re(1)-O(1)  | 2.198(2)  | C(19)-C(20) | 1.388(5) |
| Re(1)-P(1)  | 2.4196(9) | C(19)-H(19) | 0.9500   |
| Re(1)-P(2)  | 2.4318(9) | C(20)-C(21) | 1.386(5) |
| P(1)-C(17)  | 1.832(4)  | C(20)-H(20) | 0.9500   |
| P(1)-C(11)  | 1.838(3)  | C(21)-C(22) | 1.390(5) |
| P(1)-C(23)  | 1.839(4)  | C(21)-H(21) | 0.9500   |
| O(1)-C(1)   | 1.295(4)  | C(22)-H(22) | 0.9500   |
| N(1)-N(2)   | 1.323(4)  | C(23)-C(24) | 1.393(4) |
| N(1)-C(2)   | 1.361(4)  | C(23)-C(28) | 1.400(5) |
| C(1)-O(2)   | 1.237(4)  | C(24)-C(25) | 1.386(5) |
| C(1)-C(2)   | 1.480(5)  | C(24)-H(24) | 0.9500   |
| P(2)-C(35)  | 1.832(4)  | C(25)-C(26) | 1.367(5) |
| P(2)-C(41)  | 1.833(3)  | C(25)-H(25) | 0.9500   |
| P(2)-C(29)  | 1.836(3)  | C(26)-C(27) | 1.391(5) |
| N(2)-N(3)   | 1.358(3)  | C(26)-H(26) | 0.9500   |
| C(2)-C(3)   | 1.379(5)  | C(27)-C(28) | 1.390(5) |
| O(3)-C(47)  | 1.172(4)  | C(27)-H(27) | 0.9500   |
| N(3)-C(3)   | 1.347(4)  | C(28)-H(28) | 0.9500   |
| N(3)-C(4)   | 1.472(4)  | C(29)-C(30) | 1.391(5) |
| C(3)-H(3)   | 0.9500    | C(29)-C(34) | 1.394(5) |
| O(4)-C(48)  | 1.173(4)  | C(30)-C(31) | 1.397(5) |
| C(4)-C(5)   | 1.509(5)  | C(30)-H(30) | 0.9500   |
| C(4)-H(4A)  | 0.9900    | C(31)-C(32) | 1.383(5) |
| C(4)-H(4B)  | 0.9900    | C(31)-H(31) | 0.9500   |
| C(5)-C(6)   | 1.386(4)  | C(32)-C(33) | 1.382(5) |
| C(5)-C(10)  | 1.398(5)  | C(32)-H(32) | 0.9500   |
| C(6)-C(7)   | 1.383(5)  | C(33)-C(34) | 1.385(4) |
| C(6)-H(6)   | 0.9500    | C(33)-H(33) | 0.9500   |
| C(7)-C(8)   | 1.379(5)  | C(34)-H(34) | 0.9500   |
| C(7)-H(7)   | 0.9500    | C(35)-C(36) | 1.399(5) |
| C(8)-C(9)   | 1.383(5)  | C(35)-C(40) | 1.405(4) |
| C(8)-H(8)   | 0.9500    | C(36)-C(37) | 1.383(5) |
| C(9)-C(10)  | 1.390(5)  | C(36)-H(36) | 0.9500   |
| C(9)-H(9)   | 0.9500    | C(37)-C(38) | 1.386(5) |
| C(10)-H(10) | 0.9500    | C(37)-H(37) | 0.9500   |
| C(11)-C(16) | 1.400(5)  | C(38)-C(39) | 1.387(5) |
| C(11)-C(12) | 1.407(5)  | C(38)-H(38) | 0.9500   |
| C(12)-C(13) | 1.382(5)  | C(39)-C(40) | 1.381(5) |
| C(12)-H(12) | 0.9500    | C(39)-H(39) | 0.9500   |
| C(13)-C(14) | 1.378(5)  | C(40)-H(40) | 0.9500   |
| C(13)-H(13) | 0.9500    | C(41)-C(46) | 1.395(5) |
| C(14)-C(15) | 1.395(5)  | C(41)-C(42) | 1.399(4) |
| C(14)-H(14) | 0.9500    | C(42)-C(43) | 1.391(5) |
| C(15)-C(16) | 1.393(5)  | C(42)-H(42) | 0.9500   |
| C(15)-H(15) | 0.9500    | C(43)-C(44) | 1.387(5) |
| C(16)-H(16) | 0.9500    | C(43)-H(43) | 0.9500   |
| C(17)-C(18) | 1.392(5)  | C(44)-C(45) | 1.380(5) |

|                   |            |                   |          |
|-------------------|------------|-------------------|----------|
| C(44)-H(44)       | 0.9500     | Cl(1S)-C(1S)      | 1.763(4) |
| C(45)-C(46)       | 1.389(5)   | C(1S)-Cl(3S)      | 1.754(4) |
| C(45)-H(45)       | 0.9500     | C(1S)-Cl(2S)      | 1.767(3) |
| C(46)-H(46)       | 0.9500     | C(1S)-H(1S)       | 1.0000   |
|                   |            |                   |          |
| C(48)-Re(1)-C(47) | 88.73(15)  | N(3)-C(4)-H(4A)   | 109.2    |
| C(48)-Re(1)-N(1)  | 98.01(13)  | C(5)-C(4)-H(4A)   | 109.2    |
| C(47)-Re(1)-N(1)  | 172.90(13) | N(3)-C(4)-H(4B)   | 109.2    |
| C(48)-Re(1)-O(1)  | 172.06(12) | C(5)-C(4)-H(4B)   | 109.2    |
| C(47)-Re(1)-O(1)  | 99.20(12)  | H(4A)-C(4)-H(4B)  | 107.9    |
| N(1)-Re(1)-O(1)   | 74.05(9)   | C(6)-C(5)-C(10)   | 118.9(3) |
| C(48)-Re(1)-P(1)  | 91.44(10)  | C(6)-C(5)-C(4)    | 120.4(3) |
| C(47)-Re(1)-P(1)  | 87.96(10)  | C(10)-C(5)-C(4)   | 120.7(3) |
| N(1)-Re(1)-P(1)   | 94.10(7)   | C(7)-C(6)-C(5)    | 120.7(3) |
| O(1)-Re(1)-P(1)   | 89.25(6)   | C(7)-C(6)-H(6)    | 119.6    |
| C(48)-Re(1)-P(2)  | 93.90(10)  | C(5)-C(6)-H(6)    | 119.6    |
| C(47)-Re(1)-P(2)  | 87.88(10)  | C(8)-C(7)-C(6)    | 120.3(4) |
| N(1)-Re(1)-P(2)   | 89.40(7)   | C(8)-C(7)-H(7)    | 119.8    |
| O(1)-Re(1)-P(2)   | 86.05(6)   | C(6)-C(7)-H(7)    | 119.8    |
| P(1)-Re(1)-P(2)   | 173.15(3)  | C(7)-C(8)-C(9)    | 119.7(4) |
| C(17)-P(1)-C(11)  | 105.23(16) | C(7)-C(8)-H(8)    | 120.2    |
| C(17)-P(1)-C(23)  | 101.66(15) | C(9)-C(8)-H(8)    | 120.2    |
| C(11)-P(1)-C(23)  | 101.38(15) | C(8)-C(9)-C(10)   | 120.3(4) |
| C(17)-P(1)-Re(1)  | 114.70(11) | C(8)-C(9)-H(9)    | 119.8    |
| C(11)-P(1)-Re(1)  | 117.84(11) | C(10)-C(9)-H(9)   | 119.8    |
| C(23)-P(1)-Re(1)  | 113.98(11) | C(9)-C(10)-C(5)   | 120.0(3) |
| C(1)-O(1)-Re(1)   | 118.9(2)   | C(9)-C(10)-H(10)  | 120.0    |
| N(2)-N(1)-C(2)    | 110.7(3)   | C(5)-C(10)-H(10)  | 120.0    |
| N(2)-N(1)-Re(1)   | 133.7(2)   | C(16)-C(11)-C(12) | 118.4(3) |
| C(2)-N(1)-Re(1)   | 115.3(2)   | C(16)-C(11)-P(1)  | 119.4(3) |
| O(2)-C(1)-O(1)    | 125.5(3)   | C(12)-C(11)-P(1)  | 122.1(3) |
| O(2)-C(1)-C(2)    | 120.6(3)   | C(13)-C(12)-C(11) | 120.5(3) |
| O(1)-C(1)-C(2)    | 113.9(3)   | C(13)-C(12)-H(12) | 119.8    |
| C(35)-P(2)-C(41)  | 103.47(15) | C(11)-C(12)-H(12) | 119.8    |
| C(35)-P(2)-C(29)  | 102.65(15) | C(14)-C(13)-C(12) | 121.3(3) |
| C(41)-P(2)-C(29)  | 103.22(15) | C(14)-C(13)-H(13) | 119.4    |
| C(35)-P(2)-Re(1)  | 114.71(11) | C(12)-C(13)-H(13) | 119.4    |
| C(41)-P(2)-Re(1)  | 114.62(11) | C(13)-C(14)-C(15) | 118.8(3) |
| C(29)-P(2)-Re(1)  | 116.44(11) | C(13)-C(14)-H(14) | 120.6    |
| N(1)-N(2)-N(3)    | 105.1(3)   | C(15)-C(14)-H(14) | 120.6    |
| N(1)-C(2)-C(3)    | 107.4(3)   | C(16)-C(15)-C(14) | 120.9(3) |
| N(1)-C(2)-C(1)    | 117.4(3)   | C(16)-C(15)-H(15) | 119.5    |
| C(3)-C(2)-C(1)    | 135.1(3)   | C(14)-C(15)-H(15) | 119.5    |
| C(3)-N(3)-N(2)    | 112.0(3)   | C(15)-C(16)-C(11) | 120.1(3) |
| C(3)-N(3)-C(4)    | 128.8(3)   | C(15)-C(16)-H(16) | 120.0    |
| N(2)-N(3)-C(4)    | 119.2(3)   | C(11)-C(16)-H(16) | 120.0    |
| N(3)-C(3)-C(2)    | 104.8(3)   | C(18)-C(17)-C(22) | 118.1(3) |
| N(3)-C(3)-H(3)    | 127.6      | C(18)-C(17)-P(1)  | 125.3(3) |
| C(2)-C(3)-H(3)    | 127.6      | C(22)-C(17)-P(1)  | 116.6(3) |
| N(3)-C(4)-C(5)    | 112.2(3)   | C(17)-C(18)-C(19) | 121.0(3) |

|                   |          |                     |            |
|-------------------|----------|---------------------|------------|
| C(17)-C(18)-H(18) | 119.5    | C(33)-C(34)-C(29)   | 120.7(3)   |
| C(19)-C(18)-H(18) | 119.5    | C(33)-C(34)-H(34)   | 119.7      |
| C(20)-C(19)-C(18) | 120.0(4) | C(29)-C(34)-H(34)   | 119.7      |
| C(20)-C(19)-H(19) | 120.0    | C(36)-C(35)-C(40)   | 118.5(3)   |
| C(18)-C(19)-H(19) | 120.0    | C(36)-C(35)-P(2)    | 121.3(3)   |
| C(21)-C(20)-C(19) | 119.9(3) | C(40)-C(35)-P(2)    | 120.2(3)   |
| C(21)-C(20)-H(20) | 120.1    | C(37)-C(36)-C(35)   | 120.4(3)   |
| C(19)-C(20)-H(20) | 120.1    | C(37)-C(36)-H(36)   | 119.8      |
| C(20)-C(21)-C(22) | 120.0(3) | C(35)-C(36)-H(36)   | 119.8      |
| C(20)-C(21)-H(21) | 120.0    | C(36)-C(37)-C(38)   | 120.6(3)   |
| C(22)-C(21)-H(21) | 120.0    | C(36)-C(37)-H(37)   | 119.7      |
| C(21)-C(22)-C(17) | 121.1(3) | C(38)-C(37)-H(37)   | 119.7      |
| C(21)-C(22)-H(22) | 119.5    | C(37)-C(38)-C(39)   | 119.6(4)   |
| C(17)-C(22)-H(22) | 119.5    | C(37)-C(38)-H(38)   | 120.2      |
| C(24)-C(23)-C(28) | 118.8(3) | C(39)-C(38)-H(38)   | 120.2      |
| C(24)-C(23)-P(1)  | 122.4(3) | C(40)-C(39)-C(38)   | 120.4(3)   |
| C(28)-C(23)-P(1)  | 118.6(3) | C(40)-C(39)-H(39)   | 119.8      |
| C(25)-C(24)-C(23) | 120.4(3) | C(38)-C(39)-H(39)   | 119.8      |
| C(25)-C(24)-H(24) | 119.8    | C(39)-C(40)-C(35)   | 120.6(3)   |
| C(23)-C(24)-H(24) | 119.8    | C(39)-C(40)-H(40)   | 119.7      |
| C(26)-C(25)-C(24) | 120.7(3) | C(35)-C(40)-H(40)   | 119.7      |
| C(26)-C(25)-H(25) | 119.6    | C(46)-C(41)-C(42)   | 118.5(3)   |
| C(24)-C(25)-H(25) | 119.6    | C(46)-C(41)-P(2)    | 123.0(3)   |
| C(25)-C(26)-C(27) | 119.7(4) | C(42)-C(41)-P(2)    | 118.4(3)   |
| C(25)-C(26)-H(26) | 120.1    | C(43)-C(42)-C(41)   | 120.5(3)   |
| C(27)-C(26)-H(26) | 120.1    | C(43)-C(42)-H(42)   | 119.7      |
| C(28)-C(27)-C(26) | 120.2(4) | C(41)-C(42)-H(42)   | 119.7      |
| C(28)-C(27)-H(27) | 119.9    | C(44)-C(43)-C(42)   | 120.3(3)   |
| C(26)-C(27)-H(27) | 119.9    | C(44)-C(43)-H(43)   | 119.8      |
| C(27)-C(28)-C(23) | 120.1(3) | C(42)-C(43)-H(43)   | 119.8      |
| C(27)-C(28)-H(28) | 120.0    | C(45)-C(44)-C(43)   | 119.4(3)   |
| C(23)-C(28)-H(28) | 120.0    | C(45)-C(44)-H(44)   | 120.3      |
| C(30)-C(29)-C(34) | 118.9(3) | C(43)-C(44)-H(44)   | 120.3      |
| C(30)-C(29)-P(2)  | 122.0(3) | C(44)-C(45)-C(46)   | 120.8(3)   |
| C(34)-C(29)-P(2)  | 119.1(3) | C(44)-C(45)-H(45)   | 119.6      |
| C(29)-C(30)-C(31) | 120.1(4) | C(46)-C(45)-H(45)   | 119.6      |
| C(29)-C(30)-H(30) | 120.0    | C(45)-C(46)-C(41)   | 120.4(3)   |
| C(31)-C(30)-H(30) | 120.0    | C(45)-C(46)-H(46)   | 119.8      |
| C(32)-C(31)-C(30) | 120.5(3) | C(41)-C(46)-H(46)   | 119.8      |
| C(32)-C(31)-H(31) | 119.8    | O(3)-C(47)-Re(1)    | 179.1(3)   |
| C(30)-C(31)-H(31) | 119.8    | O(4)-C(48)-Re(1)    | 178.4(3)   |
| C(33)-C(32)-C(31) | 119.5(3) | Cl(3S)-C(1S)-Cl(1S) | 111.3(2)   |
| C(33)-C(32)-H(32) | 120.3    | Cl(3S)-C(1S)-Cl(2S) | 110.58(19) |
| C(31)-C(32)-H(32) | 120.3    | Cl(1S)-C(1S)-Cl(2S) | 110.2(2)   |
| C(32)-C(33)-C(34) | 120.4(4) | Cl(3S)-C(1S)-H(1S)  | 108.2      |
| C(32)-C(33)-H(33) | 119.8    | Cl(1S)-C(1S)-H(1S)  | 108.2      |
| C(34)-C(33)-H(33) | 119.8    | Cl(2S)-C(1S)-H(1S)  | 108.2      |

Table S32. Anisotropic displacement parameters ( $\text{\AA}^2 \times 10^3$ ) for 7. The anisotropic displacement factor exponent takes the form:  $-2\pi^2 [h^2 a^{*2} U^{11} + \dots + 2 h k a^* b^* U^{12}]$

|       | U11   | U22   | U33   | U23   | U13   | U12   |
|-------|-------|-------|-------|-------|-------|-------|
| Re(1) | 9(1)  | 9(1)  | 11(1) | 1(1)  | 1(1)  | 0(1)  |
| P(1)  | 11(1) | 10(1) | 11(1) | 1(1)  | 2(1)  | 0(1)  |
| O(1)  | 10(1) | 14(1) | 15(1) | -1(1) | 2(1)  | -1(1) |
| N(1)  | 11(1) | 9(1)  | 12(2) | 1(1)  | 2(1)  | 0(1)  |
| C(1)  | 14(2) | 7(2)  | 22(2) | 3(2)  | 4(2)  | -1(1) |
| P(2)  | 10(1) | 10(1) | 12(1) | 1(1)  | 2(1)  | 0(1)  |
| O(2)  | 18(1) | 18(1) | 12(1) | 1(1)  | -2(1) | -1(1) |
| N(2)  | 11(2) | 15(2) | 16(2) | 1(1)  | 2(1)  | 0(1)  |
| C(2)  | 11(2) | 7(2)  | 15(2) | 3(1)  | 2(1)  | -2(1) |
| O(3)  | 11(1) | 26(2) | 30(2) | 6(1)  | 2(1)  | 3(1)  |
| N(3)  | 9(2)  | 14(2) | 20(2) | 1(1)  | 3(1)  | 0(1)  |
| C(3)  | 15(2) | 14(2) | 13(2) | 1(2)  | 4(1)  | -2(2) |
| O(4)  | 25(2) | 20(1) | 12(1) | -3(1) | 1(1)  | 0(1)  |
| C(4)  | 14(2) | 20(2) | 17(2) | -4(2) | 6(2)  | 4(2)  |
| C(5)  | 14(2) | 17(2) | 14(2) | -2(2) | 7(2)  | 2(2)  |
| C(6)  | 15(2) | 23(2) | 18(2) | -3(2) | 5(2)  | 1(2)  |
| C(7)  | 17(2) | 34(2) | 24(2) | -6(2) | 6(2)  | -4(2) |
| C(8)  | 28(2) | 25(2) | 33(3) | -9(2) | 21(2) | -8(2) |
| C(9)  | 41(3) | 16(2) | 23(2) | 6(2)  | 20(2) | 11(2) |
| C(10) | 16(2) | 30(2) | 17(2) | 2(2)  | 5(2)  | 8(2)  |
| C(11) | 14(2) | 10(2) | 12(2) | 4(2)  | 0(2)  | -1(1) |
| C(12) | 13(2) | 12(2) | 21(2) | 1(2)  | 2(2)  | 1(2)  |
| C(13) | 19(2) | 15(2) | 21(2) | -3(2) | 2(2)  | -4(2) |
| C(14) | 13(2) | 19(2) | 22(2) | 5(2)  | -1(2) | -6(2) |
| C(15) | 11(2) | 20(2) | 24(2) | 5(2)  | 5(2)  | 3(2)  |
| C(16) | 18(2) | 12(2) | 18(2) | 4(2)  | 2(2)  | 5(2)  |
| C(17) | 17(2) | 6(2)  | 15(2) | -4(1) | 3(2)  | 3(1)  |
| C(18) | 20(2) | 12(2) | 15(2) | -1(2) | 2(2)  | 2(2)  |
| C(19) | 34(2) | 10(2) | 20(2) | 3(2)  | 8(2)  | -1(2) |
| C(20) | 33(2) | 19(2) | 13(2) | 1(2)  | -2(2) | 6(2)  |
| C(21) | 22(2) | 16(2) | 21(2) | 0(2)  | -7(2) | -3(2) |
| C(22) | 18(2) | 10(2) | 23(2) | 1(2)  | 1(2)  | 2(2)  |
| C(23) | 11(2) | 7(2)  | 18(2) | -2(2) | 2(2)  | -5(1) |
| C(24) | 15(2) | 13(2) | 21(2) | -2(2) | 5(2)  | -1(2) |
| C(25) | 16(2) | 14(2) | 27(2) | 3(2)  | 2(2)  | 2(2)  |
| C(26) | 21(2) | 16(2) | 30(2) | -3(2) | 13(2) | 0(2)  |
| C(27) | 24(2) | 19(2) | 20(2) | 0(2)  | 9(2)  | -5(2) |
| C(28) | 16(2) | 11(2) | 23(2) | -1(2) | 3(2)  | -1(2) |
| C(29) | 10(2) | 7(2)  | 16(2) | -1(1) | 1(2)  | -3(1) |
| C(30) | 17(2) | 17(2) | 16(2) | -5(2) | 3(2)  | -2(2) |
| C(31) | 21(2) | 24(2) | 19(2) | 2(2)  | -6(2) | -1(2) |
| C(32) | 14(2) | 14(2) | 29(2) | 1(2)  | -3(2) | 0(2)  |
| C(33) | 12(2) | 13(2) | 30(2) | -2(2) | 8(2)  | 2(2)  |
| C(34) | 18(2) | 11(2) | 19(2) | 3(2)  | 2(2)  | -2(2) |
| C(35) | 9(2)  | 15(2) | 12(2) | 0(2)  | -2(1) | 1(1)  |
| C(36) | 14(2) | 14(2) | 16(2) | 0(2)  | 2(2)  | 1(2)  |
| C(37) | 16(2) | 18(2) | 18(2) | -2(2) | 4(2)  | 2(2)  |

|        |       |       |       |       |       |       |
|--------|-------|-------|-------|-------|-------|-------|
| C(38)  | 15(2) | 28(2) | 13(2) | -2(2) | 2(2)  | -6(2) |
| C(39)  | 17(2) | 19(2) | 26(2) | 5(2)  | 2(2)  | -5(2) |
| C(40)  | 14(2) | 16(2) | 19(2) | -2(2) | 4(2)  | -3(2) |
| C(41)  | 13(2) | 12(2) | 12(2) | -1(2) | 3(2)  | -2(1) |
| C(42)  | 13(2) | 12(2) | 17(2) | 1(2)  | 2(2)  | 1(1)  |
| C(43)  | 16(2) | 19(2) | 16(2) | 2(2)  | -1(2) | -2(2) |
| C(44)  | 19(2) | 15(2) | 16(2) | -2(2) | 3(2)  | -5(2) |
| C(45)  | 19(2) | 11(2) | 23(2) | -1(2) | 5(2)  | -2(2) |
| C(46)  | 17(2) | 12(2) | 18(2) | 0(2)  | -1(2) | -4(2) |
| C(47)  | 19(2) | 10(2) | 14(2) | 0(2)  | 0(2)  | 1(2)  |
| C(48)  | 10(2) | 9(2)  | 24(2) | 3(2)  | 4(2)  | 2(1)  |
| Cl(1S) | 79(1) | 26(1) | 25(1) | 4(1)  | -3(1) | 9(1)  |
| C(1S)  | 24(2) | 21(2) | 15(2) | -6(2) | 0(2)  | 5(2)  |
| Cl(2S) | 30(1) | 29(1) | 21(1) | -5(1) | -4(1) | 3(1)  |
| Cl(3S) | 28(1) | 24(1) | 26(1) | -8(1) | 7(1)  | 3(1)  |

---

Table S33. Hydrogen coordinates ( $\times 10^4$ ) and isotropic displacement parameters ( $\text{\AA}^2 \times 10^3$ ) for 7.

|       | x    | y     | z    | U(eq) |
|-------|------|-------|------|-------|
| H(3)  | 5133 | 5459  | 4530 | 17    |
| H(4A) | 5208 | 4480  | 2853 | 20    |
| H(4B) | 5702 | 4208  | 3554 | 20    |
| H(6)  | 6862 | 5206  | 3918 | 22    |
| H(7)  | 7708 | 6661  | 3842 | 30    |
| H(8)  | 7280 | 8114  | 3158 | 32    |
| H(9)  | 6018 | 8071  | 2512 | 30    |
| H(10) | 5195 | 6559  | 2532 | 25    |
| H(12) | 2628 | 9241  | 4036 | 19    |
| H(13) | 3798 | 10219 | 4325 | 22    |
| H(14) | 4910 | 9807  | 3885 | 22    |
| H(15) | 4853 | 8348  | 3163 | 22    |
| H(16) | 3697 | 7312  | 2888 | 20    |
| H(18) | 2664 | 8562  | 2126 | 19    |
| H(19) | 2101 | 8871  | 1046 | 25    |
| H(20) | 838  | 8187  | 621  | 27    |
| H(21) | 171  | 7109  | 1259 | 26    |
| H(22) | 761  | 6727  | 2321 | 21    |
| H(24) | 877  | 8984  | 2778 | 20    |
| H(25) | 67   | 10044 | 3301 | 23    |
| H(26) | 147  | 9904  | 4402 | 26    |
| H(27) | 984  | 8603  | 4986 | 24    |
| H(28) | 1768 | 7483  | 4466 | 20    |
| H(30) | 2971 | 2948  | 5187 | 20    |
| H(31) | 4236 | 2311  | 5655 | 27    |
| H(32) | 5204 | 2049  | 5028 | 24    |
| H(33) | 4897 | 2380  | 3924 | 21    |
| H(34) | 3644 | 3016  | 3453 | 19    |
| H(36) | 1497 | 4963  | 4749 | 18    |
| H(37) | 713  | 4656  | 5516 | 21    |
| H(38) | 371  | 2886  | 5759 | 23    |
| H(39) | 811  | 1414  | 5220 | 25    |
| H(40) | 1552 | 1709  | 4422 | 19    |
| H(42) | 855  | 3447  | 2872 | 17    |
| H(43) | 391  | 2242  | 2033 | 21    |
| H(44) | 1089 | 640   | 1920 | 20    |
| H(45) | 2228 | 226   | 2668 | 21    |
| H(46) | 2690 | 1407  | 3517 | 19    |
| H(1S) | 2346 | 8946  | 6152 | 25    |

Table S34. Torsion angles [°] for 7.

|                         |           |                         |           |
|-------------------------|-----------|-------------------------|-----------|
| Re(1)-O(1)-C(1)-O(2)    | -172.4(3) | Re(1)-P(1)-C(17)-C(22)  | 55.9(3)   |
| Re(1)-O(1)-C(1)-C(2)    | 6.7(4)    | C(22)-C(17)-C(18)-C(19) | 0.5(5)    |
| C(2)-N(1)-N(2)-N(3)     | 0.3(3)    | P(1)-C(17)-C(18)-C(19)  | -177.3(3) |
| Re(1)-N(1)-N(2)-N(3)    | -173.0(2) | C(17)-C(18)-C(19)-C(20) | 1.6(5)    |
| N(2)-N(1)-C(2)-C(3)     | -0.3(4)   | C(18)-C(19)-C(20)-C(21) | -2.0(5)   |
| Re(1)-N(1)-C(2)-C(3)    | 174.3(2)  | C(19)-C(20)-C(21)-C(22) | 0.3(6)    |
| N(2)-N(1)-C(2)-C(1)     | -176.5(3) | C(20)-C(21)-C(22)-C(17) | 1.8(5)    |
| Re(1)-N(1)-C(2)-C(1)    | -1.9(4)   | C(18)-C(17)-C(22)-C(21) | -2.2(5)   |
| O(2)-C(1)-C(2)-N(1)     | 176.0(3)  | P(1)-C(17)-C(22)-C(21)  | 175.8(3)  |
| O(1)-C(1)-C(2)-N(1)     | -3.1(4)   | C(17)-P(1)-C(23)-C(24)  | -13.3(3)  |
| O(2)-C(1)-C(2)-C(3)     | 1.2(6)    | C(11)-P(1)-C(23)-C(24)  | 95.1(3)   |
| O(1)-C(1)-C(2)-C(3)     | -177.9(3) | Re(1)-P(1)-C(23)-C(24)  | -137.2(2) |
| N(1)-N(2)-N(3)-C(3)     | -0.1(4)   | C(17)-P(1)-C(23)-C(28)  | 171.9(3)  |
| N(1)-N(2)-N(3)-C(4)     | 178.3(3)  | C(11)-P(1)-C(23)-C(28)  | -79.7(3)  |
| N(2)-N(3)-C(3)-C(2)     | -0.1(4)   | Re(1)-P(1)-C(23)-C(28)  | 47.9(3)   |
| C(4)-N(3)-C(3)-C(2)     | -178.3(3) | C(28)-C(23)-C(24)-C(25) | 0.7(5)    |
| N(1)-C(2)-C(3)-N(3)     | 0.2(4)    | P(1)-C(23)-C(24)-C(25)  | -174.2(3) |
| C(1)-C(2)-C(3)-N(3)     | 175.4(3)  | C(23)-C(24)-C(25)-C(26) | 1.5(5)    |
| C(3)-N(3)-C(4)-C(5)     | -69.9(4)  | C(24)-C(25)-C(26)-C(27) | -2.3(5)   |
| N(2)-N(3)-C(4)-C(5)     | 112.0(3)  | C(25)-C(26)-C(27)-C(28) | 1.0(5)    |
| N(3)-C(4)-C(5)-C(6)     | 110.2(4)  | C(26)-C(27)-C(28)-C(23) | 1.1(5)    |
| N(3)-C(4)-C(5)-C(10)    | -68.3(4)  | C(24)-C(23)-C(28)-C(27) | -1.9(5)   |
| C(10)-C(5)-C(6)-C(7)    | -0.6(5)   | P(1)-C(23)-C(28)-C(27)  | 173.1(3)  |
| C(4)-C(5)-C(6)-C(7)     | -179.1(3) | C(35)-P(2)-C(29)-C(30)  | -15.5(3)  |
| C(5)-C(6)-C(7)-C(8)     | 2.2(6)    | C(41)-P(2)-C(29)-C(30)  | -122.8(3) |
| C(6)-C(7)-C(8)-C(9)     | -1.5(6)   | Re(1)-P(2)-C(29)-C(30)  | 110.7(3)  |
| C(7)-C(8)-C(9)-C(10)    | -0.8(6)   | C(35)-P(2)-C(29)-C(34)  | 167.6(3)  |
| C(8)-C(9)-C(10)-C(5)    | 2.4(6)    | C(41)-P(2)-C(29)-C(34)  | 60.2(3)   |
| C(6)-C(5)-C(10)-C(9)    | -1.7(5)   | Re(1)-P(2)-C(29)-C(34)  | -66.3(3)  |
| C(4)-C(5)-C(10)-C(9)    | 176.8(3)  | C(34)-C(29)-C(30)-C(31) | -0.4(5)   |
| C(17)-P(1)-C(11)-C(16)  | -68.5(3)  | P(2)-C(29)-C(30)-C(31)  | -177.3(3) |
| C(23)-P(1)-C(11)-C(16)  | -174.1(3) | C(29)-C(30)-C(31)-C(32) | 0.6(5)    |
| Re(1)-P(1)-C(11)-C(16)  | 60.8(3)   | C(30)-C(31)-C(32)-C(33) | -0.8(5)   |
| C(17)-P(1)-C(11)-C(12)  | 114.7(3)  | C(31)-C(32)-C(33)-C(34) | 0.9(5)    |
| C(23)-P(1)-C(11)-C(12)  | 9.1(3)    | C(32)-C(33)-C(34)-C(29) | -0.7(5)   |
| Re(1)-P(1)-C(11)-C(12)  | -116.0(3) | C(30)-C(29)-C(34)-C(33) | 0.4(5)    |
| C(16)-C(11)-C(12)-C(13) | 1.2(5)    | P(2)-C(29)-C(34)-C(33)  | 177.5(3)  |
| P(1)-C(11)-C(12)-C(13)  | 178.1(3)  | C(41)-P(2)-C(35)-C(36)  | -143.7(3) |
| C(11)-C(12)-C(13)-C(14) | 0.5(5)    | C(29)-P(2)-C(35)-C(36)  | 109.2(3)  |
| C(12)-C(13)-C(14)-C(15) | -1.1(5)   | Re(1)-P(2)-C(35)-C(36)  | -18.1(3)  |
| C(13)-C(14)-C(15)-C(16) | 0.0(5)    | C(41)-P(2)-C(35)-C(40)  | 38.4(3)   |
| C(14)-C(15)-C(16)-C(11) | 1.7(5)    | C(29)-P(2)-C(35)-C(40)  | -68.8(3)  |
| C(12)-C(11)-C(16)-C(15) | -2.3(5)   | Re(1)-P(2)-C(35)-C(40)  | 164.0(2)  |
| P(1)-C(11)-C(16)-C(15)  | -179.2(3) | C(40)-C(35)-C(36)-C(37) | -1.7(5)   |
| C(11)-P(1)-C(17)-C(18)  | 4.8(3)    | P(2)-C(35)-C(36)-C(37)  | -179.7(2) |
| C(23)-P(1)-C(17)-C(18)  | 110.2(3)  | C(35)-C(36)-C(37)-C(38) | 1.7(5)    |
| Re(1)-P(1)-C(17)-C(18)  | -126.3(3) | C(36)-C(37)-C(38)-C(39) | -0.2(5)   |
| C(11)-P(1)-C(17)-C(22)  | -173.0(3) | C(37)-C(38)-C(39)-C(40) | -1.1(5)   |
| C(23)-P(1)-C(17)-C(22)  | -67.6(3)  | C(38)-C(39)-C(40)-C(35) | 1.1(5)    |

|                         |           |                         |           |
|-------------------------|-----------|-------------------------|-----------|
| C(36)-C(35)-C(40)-C(39) | 0.3(5)    | C(46)-C(41)-C(42)-C(43) | -2.7(5)   |
| P(2)-C(35)-C(40)-C(39)  | 178.4(3)  | P(2)-C(41)-C(42)-C(43)  | 176.1(3)  |
| C(35)-P(2)-C(41)-C(46)  | -100.9(3) | C(41)-C(42)-C(43)-C(44) | 0.5(5)    |
| C(29)-P(2)-C(41)-C(46)  | 5.8(3)    | C(42)-C(43)-C(44)-C(45) | 1.3(5)    |
| Re(1)-P(2)-C(41)-C(46)  | 133.5(3)  | C(43)-C(44)-C(45)-C(46) | -0.8(5)   |
| C(35)-P(2)-C(41)-C(42)  | 80.3(3)   | C(44)-C(45)-C(46)-C(41) | -1.5(6)   |
| C(29)-P(2)-C(41)-C(42)  | -173.0(3) | C(42)-C(41)-C(46)-C(45) | 3.2(5)    |
| Re(1)-P(2)-C(41)-C(42)  | -45.3(3)  | P(2)-C(41)-C(46)-C(45)  | -175.6(3) |

---



## References:

1. C. P. Casey, M. W. Meszaros, S. M. Neumann, I. G. Cesa and K. J. Haller, *Organometallics*, 1985, **4**, 143-149.
2. H. He, J. E. Morely, E. Silva-Lopez, B. Bottenus, M. Montajano, G. A. Fugate, B. Twamley and P. D. Benny, *Bioconjugate Chem.*, 2009, **20**, 78-86.
3. A. Maisonial, P. Serafin, M. Traïkia, E. Debiton, V. Théry, D. J. Aitken, P. Lemoine, B. Viossat and A. Gautier, *Eur. J. Inorg. Chem.*, 2008, **2008**, 298-305.
4. G. M. Sheldrick, SADABS. Version 2.10; University of Göttingen: Göttingen, Germany, 2003.
5. G. M. Sheldrick, SHELXS-97, Crystal Structure Solution; University of Göttingen: Göttingen, Germany, 1997.
6. G.G. Sheldrick, SHELXL-97, Crystal Structure Refinement; University of Göttingen: Göttingen, Germany, 1997.
7. G.G. Sheldrick, SHELXL-2013, Crystal Structure Refinement; University of Göttingen: Göttingen, Germany, 2013.
8. X-SEED: L. J. Barbour, *J. Supramol. Chem.* 2001, **1**, 189-191.
